# Supplementary material for: Copper-catalyzed C–H/N–H cross-coupling reactions for the synthesis of 3-heteroaryl quinoxalin-2(1H)-ones
Source: Royal Society of Chemistry journal article supplement (doi:10.1039/c9ob00294d), 2019-01-01

Copper-catalyzed C-H/N-H cross-coupling reactions for the synthesis of  
3-heteroaryl quinoxalin-2(1H)-ones

Tao Guo,<sup>\*a</sup> Chuan-Chuan Wang,<sup>b</sup> Xiang-Heng Fu,<sup>a</sup> Yu Liu,<sup>a</sup> and Pan-Ke Zhang<sup>\*c</sup>

<sup>a</sup> *College of Chemistry, Chemical and Environmental Engineering, Henan University of  
Technology, Zhengzhou, Henan 450001, PR China*

<sup>b</sup> *Faculty of science, Henan University of Animal Husbandry and Economy, No. 2 Yingcai  
Street, Huiji District, Zhengzhou 450044, Henan, PR China*

<sup>c</sup> *College of Chemistry and Molecular Engineering, Zhengzhou University, 100 Kexue Avenue,  
Zhengzhou, Henan 450001, PR China*

**Supplementary Information**

**Table of Content**

|                                                                                   |    |
|-----------------------------------------------------------------------------------|----|
| 1 General Experimental.....                                                       | 2  |
| 2 General procedure for the synthesis of 3-heteroaryl quinoxalin-2(1H)-ones ..... | 2  |
| 3 General procedure for antiproliferative activity assays.....                    | 11 |
| 4 Copies of <sup>1</sup> H and <sup>13</sup> C NMR Spectra .....                  | 12 |

## 1 General Experimental

Reactions were monitored by thin layer chromatography (TLC), on glass plates coated with silica gel with Fluorescent indicator (Huanghai, HSGF254). Flash chromatography was performed on silica gel (Huanghai, 300-400) using hexane-EtOAc as eluent.  $^1\text{H}$  NMR and  $^{13}\text{C}$  NMR spectra were recorded on a Bruker AM500 (500, 400MHz) with chemical shift values in ppm relative to TMS ( $\delta\text{H}$  0.00 and  $\delta\text{C}$  0.0) or residual chloroform ( $\delta\text{H}$  7.28 and  $\delta\text{C}$  77.1) as standard. Mass spectra were recorded on Thermo-Q Exactive Plus instrument or HP-5989A instrument.

## 2 General procedure for the synthesis of 3-heteroaryl quinoxalin-2(1H)-ones

0.5 mL DMAc was added into the flask charged with quinoxalin-2(1H)-ones (**1**, 0.375 mmol), unprotected 2-quinoxalinones or 2-quinolinones (**2**, 0.25 mmol),  $\text{Cu}(\text{OAc})_2$  (10 mol%),  $\text{K}_2\text{CO}_3$  (0.1 mmol). The mixture was stirred at 120 °C under air for 8h. Then the reaction was cooled down to room temperature, diluted with 20 mL ethyl acetate and washed with 10 mL  $\text{H}_2\text{O}$ . The aqueous layer was extracted twice with ethyl acetate (5 mL) and the combined organic phase was dried over  $\text{Na}_2\text{SO}_4$ . After evaporation of the solvents the residue was purified by flash column chromatography (silica gel, PE-EtOAc, 3:1 to 1:1) to afford the desired products.

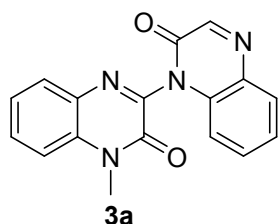

4'-methyl-2H-[1,2'-biquinoxaline]-2,3'(4'H)-dione

Purified by flash chromatograph column (PE : EtOAc = 2 : 1). Yellow solid. mp 258-260 °C

$^1\text{H}$  NMR (500 MHz,  $\text{DMSO-d}_6$ )  $\delta$  8.42 (s, 1H), 7.97 – 7.93 (m, 2H), 7.88 – 7.84 (m, 1H), 7.77 (d,  $J$  = 8.0 Hz, 1H), 7.55 – 7.52 (m, 2H), 7.45 (t,  $J$  = 7.5 Hz, 1H), 7.26 (d,  $J$  = 8.0 Hz, 1H), 3.75 (s, 3H)

$^{13}\text{C}$  NMR (125 MHz,  $\text{DMSO-d}_6$ )  $\delta$  153.5, 151.2, 150.7, 145.4, 134.6, 132.7, 132.2, 131.7, 131.4, 131.0, 130.0, 129.8, 124.6, 124.4, 115.5, 115.3, 30.0

IR (KBr) 2922, 2853, 1655, 1600, 1460, 1219, 729  $\text{cm}^{-1}$

HRMS for  $\text{C}_{17}\text{H}_{13}\text{N}_4\text{O}_2^+(\text{M}^+\text{+H})$ : calcd. 305.10330, found 305.10321

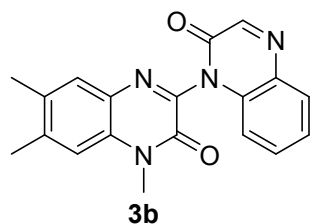

4',6',7'-trimethyl-2H-[1,2'-biquinoxaline]-2,3'(4'H)-dione

Purified by flash chromatograph column (PE : EtOAc = 2 : 1). Yellow solid. mp 236-238 °C

**<sup>1</sup>H NMR (400 MHz, DMSO-*d*<sub>6</sub>)** δ 8.40 (s, 1H), 7.94 (dd, *J* = 7.6, 1.2 Hz, 1H), 7.69 (s, 1H), 7.58 (s, 1H), 7.53 – 7.49 (m, 1H), 7.45 – 7.41 (m, 1H), 7.14 (dd, *J* = 8.4, 0.8 Hz, 1H), 3.72 (s, 3H), 2.48 (s, 3H), 2.36 (s, 3H)

**<sup>13</sup>C NMR (100 MHz, DMSO-*d*<sub>6</sub>)** δ 153.4, 151.1, 150.7, 144.0, 142.9, 133.3, 132.6, 132.2, 131.8, 131.3, 129.7, 129.6, 129.3, 124.4, 115.6, 115.1, 29.9, 20.2, 18.6

**IR (KBr)** 2921, 2852, 1656, 1458, 1312, 1298, 1040, 755 cm<sup>-1</sup>

**HRMS for C<sub>19</sub>H<sub>17</sub>N<sub>4</sub>O<sub>2</sub><sup>+</sup>(M<sup>+</sup>+H):** calcd. 333.13460, found 333.13409

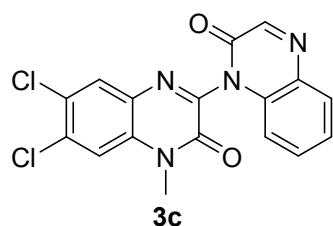

6',7'-dichloro-4'-methyl-2H-[1,2'-biquinoxaline]-2,3'(4'H)-dione

Purified by flash chromatograph column (PE : EtOAc = 2 : 1). Yellow solid. mp 247-249 °C

**<sup>1</sup>H NMR (400 MHz, DMSO-*d*<sub>6</sub>)** δ 8.43 (s, 1H), 8.27 (s, 1H), 8.11 (s, 1H), 7.96 (dd, *J* = 8.0, 1.2 Hz, 1H), 7.57 – 7.53 (m, 1H), 7.48 – 7.44 (m, 1H), 7.31 (dd, *J* = 8.4, 0.8 Hz, 1H), 3.74 (s, 3H)

**<sup>13</sup>C NMR (100 MHz, DMSO-*d*<sub>6</sub>)** δ 153.3, 150.8, 150.5, 146.8, 135.1, 134.5, 132.1, 131.5, 131.3, 130.6, 130.3, 129.7, 126.4, 124.6, 117.3, 115.3, 30.5

**IR (KBr)** 2921, 2852, 1660, 1598, 1461, 1299, 1189, 1101, 756 cm<sup>-1</sup>

**HRMS for C<sub>17</sub>H<sub>11</sub>Cl<sub>2</sub>N<sub>4</sub>O<sub>2</sub><sup>+</sup>(M<sup>+</sup>+H):** calcd. 373.02536, found 373.02505

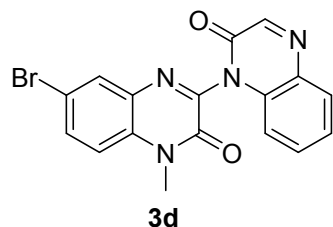

7'-bromo-4'-methyl-2H-[1,2'-biquinoxaline]-2,3'(4'H)-dione

Purified by flash chromatograph column (PE : EtOAc = 2 : 1). Yellow solid. mp 266-268 °C

**<sup>1</sup>H NMR (400 MHz, DMSO-*d*<sub>6</sub>)** δ 8.46 (s, 1H), 8.05 (d, *J* = 2.0 Hz, 1H), 7.99 (dd, *J* = 7.6, 0.8 Hz, 1H), 7.89 (d, *J* = 8.4 Hz, 1H), 7.73 (dd, *J* = 8.8, 2.0 Hz, 1H), 7.60 – 7.56 (m, 1H), 7.51 – 7.47 (m, 1H), 7.31 (d, *J* = 8.4 Hz, 1H), 3.77 (s, 3H)

**<sup>13</sup>C NMR (100 MHz, DMSO-*d*<sub>6</sub>)** δ 153.4, 151.0, 150.6, 145.7, 135.8, 132.1, 131.6, 131.5, 131.3, 130.0, 129.7, 127.3, 126.1, 124.6, 118.3, 115.3, 30.2

**IR (KBr)** 2921, 2851, 1664, 1594, 1458, 1294, 1078, 831, 781 cm<sup>-1</sup>

**HRMS for C<sub>17</sub>H<sub>12</sub>BrN<sub>4</sub>O<sub>2</sub><sup>+</sup>(M<sup>+</sup>+H):** calcd. 383.01381, found 383.01373

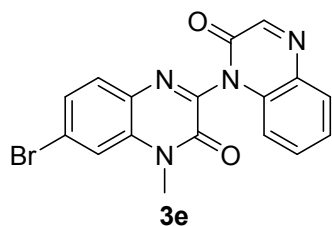

6'-bromo-4'-methyl-2H-[1,2'-biquinoxaline]-2,3'(4'H)-dione

Purified by flash chromatograph column (PE : EtOAc = 2 : 1). Yellow solid. mp 279-281 °C

**<sup>1</sup>H NMR (400 MHz, DMSO-*d*<sub>6</sub>)** δ 8.42 (s, 1H), 8.16 (d, *J* = 2.4 Hz, 1H), 8.00 (dd, *J* = 9.2, 2.4 Hz, 1H), 7.95 (dd, *J* = 8.0, 1.2 Hz, 1H), 7.73 (d, *J* = 9.2 Hz, 1H), 7.56 – 7.51 (m, 1H), 7.48 – 7.43 (m, 1H), 7.29 (dd, *J* = 8.4, 0.8 Hz, 1H), 3.73 (s, 3H)

**<sup>13</sup>C NMR (100 MHz, DMSO-*d*<sub>6</sub>)** δ 153.4, 151.0, 150.6, 146.6, 135.0, 134.0, 132.1, 131.9, 131.7, 131.6, 131.3, 129.7, 124.6, 117.6, 115.9, 115.3, 30.2

**IR (KBr)** 2921, 2852, 1662, 1456, 1299, 1188, 814, 755 cm<sup>-1</sup>

**HRMS for C<sub>17</sub>H<sub>12</sub>BrN<sub>4</sub>O<sub>2</sub><sup>+</sup>(M<sup>+</sup>+H):** calcd. 383.01381, found 383.01389

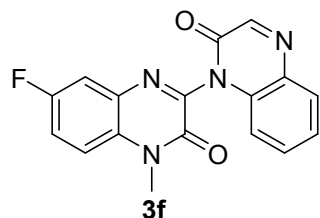

7'-fluoro-4'-methyl-2H-[1,2'-biquinoxaline]-2,3'(4'H)-dione

Purified by flash chromatograph column (PE : EtOAc = 2 : 1). Yellow solid. mp 265-267 °C

**<sup>1</sup>H NMR (400 MHz, DMSO-*d*<sub>6</sub>)** δ 8.41 (s, 1H), 8.01 – 7.94 (m, 2H), 7.70 (dd, *J* = 6.8, 2.4 Hz, 1H), 7.55 – 7.51 (m, 1H), 7.47 – 7.38 (m, 2H), 7.28 – 7.26 (m, 1H), 3.71 (s, 3H)

**<sup>13</sup>C NMR (100 MHz, DMSO-*d*<sub>6</sub>)** δ 164.1 (d, *J*<sub>C-F</sub> = 248.8 Hz), 153.4, 151.1, 150.6, 144.4 (d, *J*<sub>C-F</sub> = 4.3 Hz), 136.5 (d, *J*<sub>C-F</sub> = 12.5 Hz), 132.4 (d, *J*<sub>C-F</sub> = 11.8 Hz), 132.1, 131.7, 131.3, 129.7, 128.0, 124.5, 115.3, 112.3 (d, *J*<sub>C-F</sub> = 24.3 Hz), 102.5 (d, *J*<sub>C-F</sub> = 28.0 Hz), 30.4

**IR (KBr)** 2920, 2851, 1659, 1598, 1460, 1223, 1093, 763 cm<sup>-1</sup>

**HRMS for C<sub>17</sub>H<sub>12</sub>FN<sub>4</sub>O<sub>2</sub><sup>+</sup>(M<sup>+</sup>+H):** calcd. 323.09388, found 323.09348

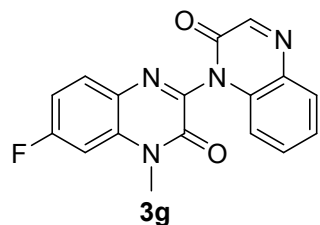

6'-fluoro-4'-methyl-2H-[1,2'-biquinoxaline]-2,3'(4'H)-dione

Purified by flash chromatograph column (PE : EtOAc = 2 : 1). Yellow solid. mp 270-271 °C

**<sup>1</sup>H NMR (500 MHz, DMSO-*d*<sub>6</sub>)** δ 8.43 (s, 1H), 7.96 (d, *J* = 8.0 Hz, 1H), 7.86 – 7.80 (m, 3H), 7.54 (t, *J* = 7.5 Hz, 1H), 7.46 (t, *J* = 7.5 Hz, 1H), 7.29 (d, *J* = 8.5 Hz, 1H), 3.76 (s, 3H)

**<sup>13</sup>C NMR (125 MHz, DMSO-*d*<sub>6</sub>)** δ 158.3 (d, *J*<sub>C-F</sub> = 240.4 Hz), 153.4, 150.9, 150.6, 146.8, 132.1, 131.7 (d, *J*<sub>C-F</sub> = 1.8 Hz), 131.6, 131.5 (d, *J*<sub>C-F</sub> = 12.4 Hz), 131.4, 129.8, 124.6, 120.4 (d, *J*<sub>C-F</sub> = 22.9 Hz), 117.3

(d,  $J_{C-F} = 8.6$  Hz), 115.3, 115.0 (d,  $J_{C-F} = 22.1$  Hz), 30.4

**IR (KBr)** 2922, 2853, 1651, 1601, 1456, 1265, 1123, 814, 755  $\text{cm}^{-1}$

**HRMS for  $\text{C}_{17}\text{H}_{12}\text{FN}_4\text{O}_2^+(\text{M}^++\text{H})$ :** calcd. 323.09388, found 323.09357

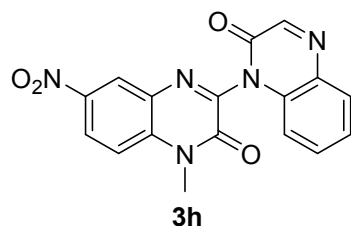

4'-methyl-7'-nitro-2H-[1,2'-biquinoxaline]-2,3'(4'H)-dione

Purified by flash chromatograph column (PE : EtOAc = 2 : 1). Yellow solid. mp 307-309 °C

**$^1\text{H}$  NMR (500 MHz, DMSO- $d_6$ )**  $\delta$  8.72 (s, 1H), 8.62 (dd,  $J = 9.5, 2.0$  Hz, 1H), 8.44 (s, 1H), 7.97 (d,  $J = 9.0$  Hz, 2H), 7.55 (t,  $J = 8.0$  Hz, 1H), 7.47 (t,  $J = 7.5$  Hz, 1H), 7.38 (d,  $J = 8.5$  Hz, 1H), 3.79 (s, 3H)

**$^{13}\text{C}$  NMR (125 MHz, DMSO- $d_6$ )**  $\delta$  153.4, 151.2, 150.6, 147.8, 143.1, 139.4, 132.2, 131.5, 131.4, 130.1, 129.8, 126.6, 125.2, 124.8, 117.0, 115.4, 30.7

**IR (KBr)** 2921, 2852, 1683, 1600, 1457, 1343, 1040, 748  $\text{cm}^{-1}$

**HRMS for  $\text{C}_{17}\text{H}_{12}\text{N}_5\text{O}_4^+(\text{M}^++\text{H})$ :** calcd. 350.08838, found 350.08826

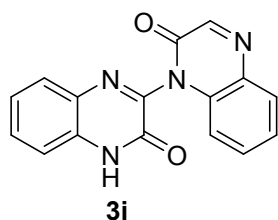

2H-[1,2'-biquinoxaline]-2,3'(4'H)-dione

Purified by flash chromatograph column (PE : EtOAc = 2 : 1). Yellow solid. mp 298-300 °C

**$^1\text{H}$  NMR (400 MHz, DMSO- $d_6$ )**  $\delta$  13.2 (s, 1H), 8.45 (s, 1H), 8.00 – 7.98 (m, 1H), 7.91 (d,  $J = 8.0$  Hz, 1H), 7.78 (t,  $J = 7.2$  Hz, 1H), 7.57 – 7.46 (m, 4H), 7.30 (d,  $J = 8.4$  Hz, 1H)

**$^{13}\text{C}$  NMR (100 MHz, DMSO- $d_6$ )**  $\delta$  153.4, 151.4, 150.6, 146.6, 133.5, 132.3, 132.1, 131.7, 131.4, 130.9, 129.7, 129.1, 124.5, 124.0, 116.0, 115.2

**IR (KBr)** 2920, 2852, 1687, 1588, 1346, 1172, 1042, 748  $\text{cm}^{-1}$

**HRMS for  $\text{C}_{16}\text{H}_{11}\text{N}_4\text{O}_2^+(\text{M}^++\text{H})$ :** calcd. 291.08765, found 291.08752

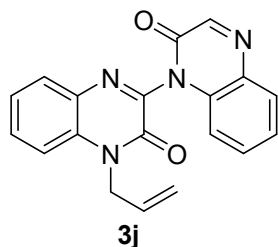

4'-allyl-2H-[1,2'-biquinoxaline]-2,3'(4'H)-dione

Purified by flash chromatograph column (PE : EtOAc = 2 : 1). Yellow solid. mp 211-213 °C

**$^1\text{H}$  NMR (500 MHz, DMSO- $d_6$ )**  $\delta$  8.42 (s, 1H), 7.96 (d,  $J = 8.0$  Hz, 2H), 7.83 (t,  $J = 7.5$  Hz, 1H), 7.71

(d,  $J = 8.5$  Hz, 1H), 7.56 – 7.52 (m, 2H), 7.46 (t,  $J = 7.5$  Hz, 1H), 7.32 (d,  $J = 8.0$  Hz, 1H), 6.03 – 5.96 (m, 1H), 5.26 – 5.18 (m, 2H), 5.04 – 4.95 (m, 2H)

$^{13}\text{C}$  NMR (125 MHz, DMSO- $d_6$ )  $\delta$  153.4, 150.8, 150.6, 145.3, 133.6, 132.6, 132.1, 131.7, 131.4, 131.2, 131.0, 130.1, 129.7, 124.5, 124.4, 117.5, 115.7, 115.2, 44.8

IR (KBr) 2921, 2852, 1658, 1600, 1460, 1298, 1078, 760  $\text{cm}^{-1}$

HRMS for  $\text{C}_{19}\text{H}_{15}\text{N}_4\text{O}_2^+(\text{M}^+\text{+H})$ : calcd. 331.11895, found 331.11887

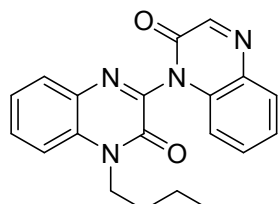

**3k**

4'-butyl-2H-[1,2'-biquinoxaline]-2,3'(4'H)-dione

Purified by flash chromatograph column (PE : EtOAc = 2 : 1). Yellow solid. mp 175-177  $^{\circ}\text{C}$

$^1\text{H}$  NMR (400 MHz, DMSO- $d_6$ )  $\delta$  8.42 (s, 1H), 7.97 – 7.94 (m, 2H), 7.85 – 7.81 (m, 2H), 7.55 – 7.50 (m, 2H), 7.47 – 7.43 (m, 1H), 7.27 (dd,  $J = 8.4, 0.8$  Hz, 1H), 4.41 – 4.26 (m, 2H), 1.73 – 1.66 (m, 2H), 1.46 – 1.37 (m, 2H), 0.92 (t,  $J = 7.6$  Hz, 3H)

$^{13}\text{C}$  NMR (100 MHz, DMSO- $d_6$ )  $\delta$  153.4, 150.9, 150.6, 145.3, 133.6, 132.7, 132.1, 131.7, 131.4, 131.2, 130.2, 129.7, 124.5, 124.2, 115.3, 115.2, 42.4, 29.0, 19.5, 13.6

IR (KBr) 2924, 2858, 1660, 1603, 1463, 1314, 1191, 1109, 748  $\text{cm}^{-1}$

HRMS for  $\text{C}_{20}\text{H}_{19}\text{N}_4\text{O}_2^+(\text{M}^+\text{+H})$ : calcd. 347.15025, found 347.15027

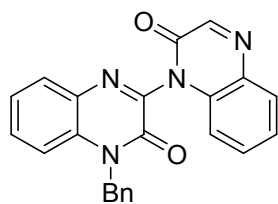

**3l**

4'-benzyl-2H-[1,2'-biquinoxaline]-2,3'(4'H)-dione

Purified by flash chromatograph column (PE : EtOAc = 2 : 1). Yellow solid. mp 223-225  $^{\circ}\text{C}$

$^1\text{H}$  NMR (400 MHz, DMSO- $d_6$ )  $\delta$  8.48 (s, 1H), 8.02 – 7.99 (m, 2H), 7.81 – 7.77 (m, 1H), 7.70 (d,  $J = 8.0$  Hz, 1H), 7.63 – 7.59 (m, 1H), 7.55 – 7.47 (m, 2H), 7.44 (dd,  $J = 8.4, 0.8$  Hz, 1H), 7.40 – 7.39 (m, 4H), 7.35 – 7.30 (m, 1H), 5.75 (d,  $J = 16.0$  Hz, 1H), 5.55 (d,  $J = 16.0$  Hz, 1H)

$^{13}\text{C}$  NMR (100 MHz, DMSO- $d_6$ )  $\delta$  153.5, 151.5, 150.6, 145.5, 135.3, 133.6, 132.7, 132.2, 131.7, 131.5, 131.3, 130.2, 129.8, 128.8, 127.6, 126.9, 124.6, 124.5, 115.7, 115.3, 45.8

IR (KBr) 2921, 2852, 1668, 1601, 1455, 1261, 1109, 1020, 733  $\text{cm}^{-1}$

HRMS for  $\text{C}_{23}\text{H}_{17}\text{N}_4\text{O}_2^+(\text{M}^+\text{+H})$ : calcd. 381.13460, found 381.13474

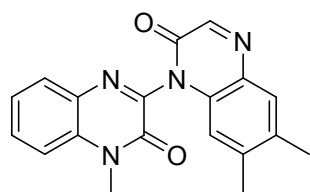

**3m**

4',6,7-trimethyl-2H-[1,2'-biquinoxaline]-2,3'(4H)-dione

Purified by flash chromatograph column (CH<sub>2</sub>Cl<sub>2</sub> : EtOAc = 4 : 1). Yellow solid. mp 273-274 °C

**<sup>1</sup>H NMR (400 MHz, DMSO-*d*<sub>6</sub>)** δ 8.29 (s, 1H), 7.93 (d, *J* = 7.6 Hz, 1H), 7.85 (t, *J* = 7.6 Hz, 1H), 7.77 (d, *J* = 7.6 Hz, 1H), 7.71 (s, 1H), 7.53 (t, *J* = 7.6 Hz, 1H), 7.06 (s, 1H), 3.75 (s, 3H), 2.31 (s, 3H), 2.23 (s, 3H)

**<sup>13</sup>C NMR (100 MHz, DMSO-*d*<sub>6</sub>)** δ 153.6, 151.2, 149.2, 145.5, 141.4, 134.6, 133.2, 132.5, 131.0, 130.6, 129.9, 129.7, 129.5, 124.2, 115.4, 115.2, 30.0, 19.5, 18.7

**IR (KBr)** 2920, 2850, 1687, 1603, 1458, 1242, 1098, 765 cm<sup>-1</sup>

**HRMS for C<sub>19</sub>H<sub>17</sub>N<sub>4</sub>O<sub>2</sub><sup>+</sup>(M<sup>+</sup>+H):** calcd. 333.13460, found 333.13480

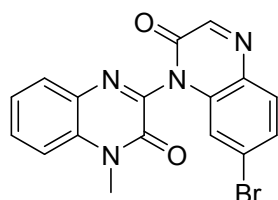

**3n**

7-bromo-4'-methyl-2H-[1,2'-biquinoxaline]-2,3'(4H)-dione

Purified by flash chromatograph column (CH<sub>2</sub>Cl<sub>2</sub> : EtOAc = 4 : 1). Yellow solid. mp 228-231 °C

**<sup>1</sup>H NMR (400 MHz, DMSO-*d*<sub>6</sub>)** δ 8.43 (s, 1H), 7.93 (dd, *J* = 8.0, 0.8 Hz, 1H), 7.88 – 7.84 (m, 2H), 7.77 (d, *J* = 8.0 Hz, 1H), 7.70 (d, *J* = 2.0 Hz, 1H), 7.61 (dd, *J* = 8.8, 2.0 Hz, 1H), 7.53 (t, *J* = 7.6 Hz, 1H), 3.73 (s, 3H)

**<sup>13</sup>C NMR (100 MHz, DMSO-*d*<sub>6</sub>)** δ 153.3, 151.4, 151.1, 145.0, 134.9, 132.9, 132.6, 131.4, 131.2, 131.2, 129.9, 127.7, 124.8, 124.2, 118.0, 115.5, 30.0

**IR (KBr)** 2922, 2852, 1650, 1586, 1344, 1078, 742 cm<sup>-1</sup>

**HRMS for C<sub>17</sub>H<sub>12</sub>BrN<sub>4</sub>O<sub>2</sub><sup>+</sup>(M<sup>+</sup>+H):** calcd. 383.01381, found 383.01389

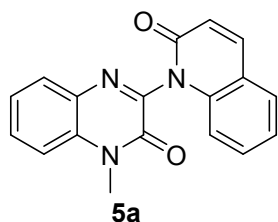

**5a**

1-methyl-3-(2-oxoquinolin-1(2H)-yl)quinoxalin-2(1H)-one

Purified by flash chromatograph column (PE : EtOAc = 2 : 1). Yellow solid. mp 284-286 °C

**<sup>1</sup>H NMR (400 MHz, DMSO-*d*<sub>6</sub>)** δ 8.12 (d, *J* = 9.6 Hz, 1H), 7.90 (dd, *J* = 8.0, 1.2 Hz, 1H), 7.84 – 7.80 (m, 2H), 7.73 (d, *J* = 8.4 Hz, 1H), 7.52 – 7.49 (m, 1H), 7.47 – 7.43 (m, 1H), 7.32 – 7.28 (m, 1H), 7.07 (d, *J* = 8.4 Hz, 1H), 6.69 (d, *J* = 9.6 Hz, 1H), 3.73 (s, 3H)

$^{13}\text{C}$  NMR (100 MHz, DMSO- $d_6$ )  $\delta$  161.1, 151.6, 147.6, 141.5, 138.9, 134.4, 132.1, 131.0, 130.9, 129.8, 128.9, 124.1, 122.9, 121.1, 119.6, 115.3, 114.7, 29.9

IR (KBr) 2922, 2853, 1652, 1585, 1448, 1212, 827, 787  $\text{cm}^{-1}$

HRMS for  $\text{C}_{18}\text{H}_{14}\text{N}_3\text{O}_2^+(\text{M}^+\text{+H})$ : calcd. 304.10805, found 304.10818

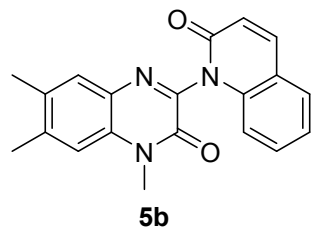

1,6,7-trimethyl-3-(2-oxoquinolin-1(2H)-yl)quinoxalin-2(1H)-one

Purified by flash chromatograph column ( $\text{CH}_2\text{Cl}_2$  : EtOAc = 4 : 1). Yellow solid. mp 221-223°C

$^1\text{H}$  NMR (400 MHz, DMSO- $d_6$ )  $\delta$  8.10 (d,  $J$  = 10.0 Hz, 1H), 7.81 (d,  $J$  = 7.6 Hz, 1H), 7.66 (s, 1H), 7.54 (s, 1H), 7.44 (t,  $J$  = 7.6 Hz, 1H), 7.29 (t,  $J$  = 7.2 Hz, 1H), 6.97 (d,  $J$  = 8.4 Hz, 1H), 6.69 (d,  $J$  = 9.6 Hz, 1H), 3.70 (s, 3H), 2.46 (s, 3H), 2.35 (s, 3H)

$^{13}\text{C}$  NMR (100 MHz, DMSO- $d_6$ )  $\delta$  161.1, 151.6, 146.3, 142.1, 141.3, 139.0, 132.9, 132.4, 130.8, 129.4, 129.4, 128.8, 122.7, 121.1, 119.6, 115.4, 114.5, 29.7, 20.1, 18.6

IR (KBr) 2921, 2853, 1651, 1620, 1376, 1219, 1005, 755  $\text{cm}^{-1}$

HRMS for  $\text{C}_{20}\text{H}_{18}\text{N}_3\text{O}_2^+(\text{M}^+\text{+H})$ : calcd. 332.13935, found 332.13904

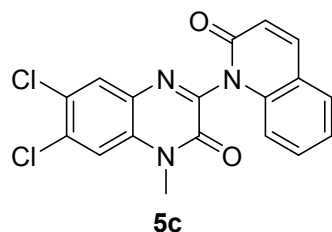

6,7-dichloro-1-methyl-3-(2-oxoquinolin-1(2H)-yl)quinoxalin-2(1H)-one

Purified by flash chromatograph column ( $\text{CH}_2\text{Cl}_2$  : EtOAc = 4 : 1). Yellow solid. mp 221-223 °C

$^1\text{H}$  NMR (400 MHz, DMSO- $d_6$ )  $\delta$  8.22 (s, 1H), 8.12 (d,  $J$  = 9.6 Hz, 1H), 8.06 (s, 1H), 7.83 – 7.81 (m, 1H), 7.48 – 7.43 (m, 1H), 7.31 (t,  $J$  = 7.6 Hz, 1H), 7.14 (d,  $J$  = 8.4 Hz, 1H), 6.69 (d,  $J$  = 9.6 Hz, 1H), 3.70 (s, 3H)

$^{13}\text{C}$  NMR (100 MHz, DMSO- $d_6$ )  $\delta$  161.0, 151.3, 149.1, 141.7, 138.7, 134.5, 134.4, 130.9, 130.5, 130.4, 128.9, 126.1, 123.0, 120.9, 119.6, 117.2, 114.8, 30.3

IR (KBr) 2919, 2849, 1652, 1590, 1452, 1251, 798, 722  $\text{cm}^{-1}$

HRMS for  $\text{C}_{18}\text{H}_{12}\text{Cl}_2\text{N}_3\text{O}_2^+(\text{M}^+\text{+H})$ : calcd. 372.03011, found 372.03012

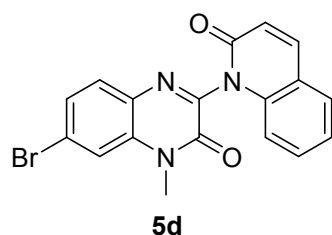

7-bromo-1-methyl-3-(2-oxoquinolin-1(2H)-yl)quinoxalin-2(1H)-one



Purified by flash chromatograph column (CH<sub>2</sub>Cl<sub>2</sub> : EtOAc = 4 : 1). Yellow solid. mp 209-211 °C

**<sup>1</sup>H NMR (400 MHz, DMSO-d<sub>6</sub>)** δ 8.15 – 8.13 (m, 2H), 7.97 (dd, *J* = 8.8, 2.0 Hz, 1H), 7.84 (d, *J* = 7.2 Hz, 1H), 7.71 (d, *J* = 9.2 Hz, 1H), 7.49 – 7.45 (m, 1H), 7.33 (t, *J* = 7.6 Hz, 1H), 7.14 (d, *J* = 8.4 Hz, 1H), 6.72 (d, *J* = 9.6 Hz, 1H), 3.73 (s, 3H)

**<sup>13</sup>C NMR (100 MHz, DMSO-d<sub>6</sub>)** δ 161.1, 151.4, 148.9, 141.6, 138.8, 134.5, 133.9, 132.0, 131.6, 130.9, 128.9, 123.0, 121.0, 119.6, 117.4, 115.7, 114.8, 30.1

**IR (KBr)** 2921, 2852, 1655, 1592, 1450, 1215, 819, 747 cm<sup>-1</sup>

**HRMS for C<sub>18</sub>H<sub>13</sub>BrN<sub>3</sub>O<sub>2</sub><sup>+</sup>(M<sup>+</sup>+H):** calcd. 382.01857, found 382.01849

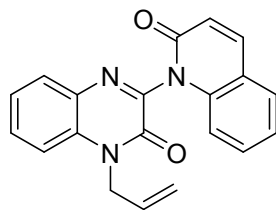

**5e**

1-allyl-3-(2-oxoquinolin-1(2H)-yl)quinoxalin-2(1H)-one

Purified by flash chromatograph column (CH<sub>2</sub>Cl<sub>2</sub> : EtOAc = 5 : 1). Yellow solid. mp 205-207 °C

**<sup>1</sup>H NMR (400 MHz, DMSO-d<sub>6</sub>)** δ 8.15 (d, *J* = 10.0 Hz, 1H), 7.95 (dd, *J* = 8.0, 1.2 Hz, 1H), 7.86 – 7.79 (m, 2H), 7.69 (d, *J* = 8.0 Hz, 1H), 7.54 – 7.47 (m, 2H), 7.33 (t, *J* = 7.6 Hz, 1H), 7.15 (d, *J* = 8.4 Hz, 1H), 6.72 (d, *J* = 9.6 Hz, 1H), 6.06 – 5.97 (m, 1H), 5.27 – 5.17 (m, 2H), 5.06 – 4.95 (m, 2H)

**<sup>13</sup>C NMR (100 MHz, DMSO-d<sub>6</sub>)** δ 161.1, 151.3, 147.6, 141.5, 138.9, 133.4, 132.1, 131.3, 131.1, 131.0, 130.0, 128.9, 124.2, 122.9, 121.0, 119.6, 117.4, 115.6, 114.7, 44.6

**IR (KBr)** 2933, 1654, 1601, 1443, 1220, 1108, 761 cm<sup>-1</sup>

**HRMS for C<sub>20</sub>H<sub>16</sub>N<sub>3</sub>O<sub>2</sub><sup>+</sup>(M<sup>+</sup>+H):** calcd. 330.12370, found 330.12344

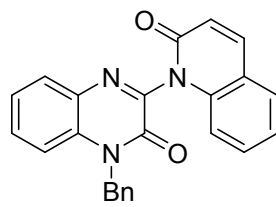

**5f**

1-benzyl-3-(2-oxoquinolin-1(2H)-yl)quinoxalin-2(1H)-one

Purified by flash chromatograph column (CH<sub>2</sub>Cl<sub>2</sub> : EtOAc = 3 : 1). Yellow solid. mp 257-259 °C

**<sup>1</sup>H NMR (400 MHz, DMSO-d<sub>6</sub>)** δ 8.15 (d, *J* = 9.6 Hz, 1H), 7.94 (d, *J* = 7.6 Hz, 1H), 7.85 (d, *J* = 7.6 Hz, 1H), 7.73 – 7.62 (m, 2H), 7.53 – 7.46 (m, 2H), 7.35 – 7.29 (m, 6H), 7.22 (d, *J* = 8.4 Hz, 1H), 6.73 (d, *J* = 9.6 Hz, 1H), 5.76 – 5.70 (m, 1H), 5.56 – 5.49 (m, 1H)

**<sup>13</sup>C NMR (100 MHz, DMSO-d<sub>6</sub>)** δ 161.2, 151.9, 147.8, 141.6, 138.9, 135.4, 133.4, 132.2, 131.4, 131.0, 130.1, 129.0, 128.8, 127.5, 126.9, 124.3, 123.0, 121.0, 120.0, 115.5, 114.7, 45.6

**IR (KBr)** 2921, 1654, 1586, 1447, 1252, 1078, 748 cm<sup>-1</sup>

**HRMS for C<sub>24</sub>H<sub>18</sub>N<sub>3</sub>O<sub>2</sub><sup>+</sup>(M<sup>+</sup>+H):** calcd. 380.13935, found 380.13943

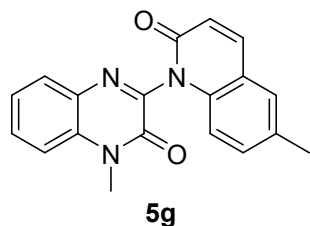

1-methyl-3-(6-methyl-2-oxoquinolin-1(2H)-yl)quinoxalin-2(1H)-one

Purified by flash chromatograph column (CH<sub>2</sub>Cl<sub>2</sub> : EtOAc = 4 : 1). Yellow solid. mp 243-245 °C

**<sup>1</sup>H NMR (400 MHz, DMSO-*d*<sub>6</sub>)** δ 8.04 (d, *J* = 9.6 Hz, 1H), 7.91 (d, *J* = 8.0 Hz, 1H), 7.81 (t, *J* = 8.4 Hz, 1H), 7.72 (d, *J* = 8.4 Hz, 1H), 7.61 (s, 1H), 7.51 (t, *J* = 7.6 Hz, 1H), 7.28 (dd, *J* = 8.8, 1.2 Hz, 1H), 6.97 (d, *J* = 8.4 Hz, 1H), 6.68 (d, *J* = 9.6 Hz, 1H), 3.74 (s, 3H), 2.36 (s, 3H)

**<sup>13</sup>C NMR (100 MHz, DMSO-*d*<sub>6</sub>)** δ 161.0, 151.6, 147.7, 141.2, 137.0, 134.4, 132.1, 132.0, 131.9, 131.0, 129.7, 128.4, 124.1, 121.0, 119.6, 115.3, 114.6, 29.8, 20.1

**IR (KBr)** 2922, 1648, 1554, 1316, 1215, 1094, 753 cm<sup>-1</sup>

**HRMS for C<sub>19</sub>H<sub>16</sub>N<sub>3</sub>O<sub>2</sub><sup>+</sup>(M<sup>+</sup>+H):** calcd. 318.12370, found 318.12396

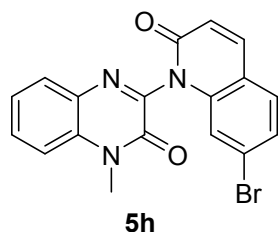

3-(7-bromo-2-oxoquinolin-1(2H)-yl)-1-methylquinoxalin-2(1H)-one

Purified by flash chromatograph column (CH<sub>2</sub>Cl<sub>2</sub> : EtOAc = 4 : 1). Yellow solid. mp 254-256 °C

**<sup>1</sup>H NMR (400 MHz, DMSO-*d*<sub>6</sub>)** δ 8.15 (d, *J* = 9.6 Hz, 1H), 7.95 (d, *J* = 8.0 Hz, 1H), 7.88 – 7.78 (m, 3H), 7.56 – 7.52 (m, 3H), 6.77 (d, *J* = 10.0 Hz, 1H), 3.76 (s, 3H)

**<sup>13</sup>C NMR (100 MHz, DMSO-*d*<sub>6</sub>)** δ 160.9, 151.8, 147.2, 141.0, 139.9, 134.7, 132.1, 131.2, 130.6, 129.8, 126.0, 124.6, 124.0, 121.4, 118.7, 117.3, 115.3, 29.8

**IR (KBr)** 2923, 1668, 1581, 1394, 1212, 1083, 795, 757 cm<sup>-1</sup>

**HRMS for C<sub>18</sub>H<sub>13</sub>BrN<sub>3</sub>O<sub>2</sub><sup>+</sup>(M<sup>+</sup>+H):** calcd. 382.01857, found 382.01859

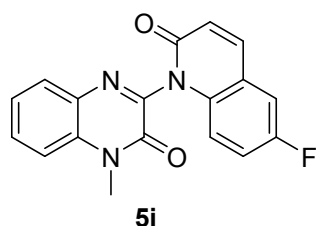

3-(6-fluoro-2-oxoquinolin-1(2H)-yl)-1-methylquinoxalin-2(1H)-one

Purified by flash chromatograph column (CH<sub>2</sub>Cl<sub>2</sub> : EtOAc = 4 : 1). Yellow solid. mp 261-263 °C

**<sup>1</sup>H NMR (400 MHz, DMSO-*d*<sub>6</sub>)** δ 8.10 (d, *J* = 9.6 Hz, 1H), 7.91 (d, *J* = 7.6 Hz, 1H), 7.81 (t, *J* = 7.6 Hz, 1H), 7.72 (d, *J* = 8.8 Hz, 2H), 7.50 (d, *J* = 7.6 Hz, 1H), 7.34 (td, *J* = 9.2, 2.8 Hz, 1H), 7.20 – 7.17 (m, 1H), 6.78 (d, *J* = 9.6 Hz, 1H), 3.73 (s, 3H)

**<sup>13</sup>C NMR (100 MHz, DMSO-*d*<sub>6</sub>)** δ 160.8, 157.5 (d, *J*<sub>C-F</sub> = 238.4 Hz), 151.6, 147.4, 140.5 (d, *J*<sub>C-F</sub> = 2.7 Hz), 135.6, 134.5, 132.2, 131.1, 129.8, 124.1, 122.4, 120.6 (d, *J*<sub>C-F</sub> = 9.6 Hz), 118.5 (d, *J*<sub>C-F</sub> = 23.3 Hz),

116.9 (d,  $J_{C-F} = 8.2$  Hz), 115.3, 113.8 (d,  $J_{C-F} = 22.9$  Hz), 29.9

**IR (KBr)** 2922, 2853, 1652, 1602, 1439, 1250, 750  $\text{cm}^{-1}$

**HRMS for  $\text{C}_{18}\text{H}_{13}\text{FN}_3\text{O}_2^+(\text{M}^+\text{+H})$ :** calcd. 322.09863, found 322.09872

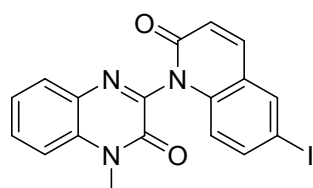

**5j**

3-(6-iodo-2-oxoquinolin-1(2H)-yl)-1-methylquinoxalin-2(1H)-one

Purified by flash chromatograph column ( $\text{CH}_2\text{Cl}_2$  : EtOAc = 4 : 1). Yellow solid. mp 282-284 °C

**$^1\text{H}$  NMR (400 MHz,  $\text{DMSO-d}_6$ )**  $\delta$  8.25 (d,  $J = 1.6$  Hz, 1H), 8.08 (d,  $J = 9.2$  Hz, 1H), 7.90 (dd,  $J = 8.0$ , 0.8 Hz, 1H), 7.85 – 7.80 (m, 1H), 7.75 – 7.71 (m, 2H), 7.51 (t,  $J = 7.2$  Hz, 1H), 6.95 (d,  $J = 9.2$  Hz, 1H), 6.74 (d,  $J = 9.6$  Hz, 1H), 3.73 (s, 3H)

**$^{13}\text{C}$  NMR (100 MHz,  $\text{DMSO-d}_6$ )**  $\delta$  160.8, 151.5, 147.1, 140.3, 138.8, 138.4, 136.8, 134.4, 132.3, 131.0, 129.8, 124.1, 122.1, 121.7, 117.1, 115.3, 86.5, 29.9

**IR (KBr)** 2922, 1661, 1602, 1471, 1205, 1136, 824, 762  $\text{cm}^{-1}$

**HRMS for  $\text{C}_{18}\text{H}_{13}\text{IN}_3\text{O}_2^+(\text{M}^+\text{+H})$ :** calcd. 430.00470, found 430.00510

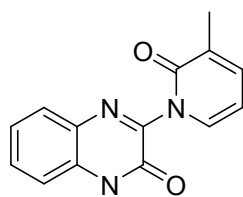

**5k**

1-methyl-3-(3-methyl-2-oxopyridin-1(2H)-yl)quinoxalin-2(1H)-one

Purified by flash chromatograph column ( $\text{CH}_2\text{Cl}_2$  : EtOAc = 4 : 1). Yellow solid. mp 210-211 °C

**$^1\text{H}$  NMR (400 MHz,  $\text{DMSO-d}_6$ )**  $\delta$  7.86 (d,  $J = 8.0$  Hz, 1H), 7.77 – 7.74 (m, 1H), 7.66 (d,  $J = 8.0$  Hz, 1H), 7.58 (d,  $J = 6.0$  Hz, 1H), 7.48 – 7.44 (m, 2H), 6.30 (t,  $J = 6.8$  Hz, 1H), 3.70 (s, 3H), 2.04 (s, 3H)

**$^{13}\text{C}$  NMR (100 MHz,  $\text{DMSO-d}_6$ )**  $\delta$  161.6, 151.2, 149.7, 138.2, 134.5, 134.1, 131.7, 130.5, 129.5, 128.9, 124.0, 115.1, 105.2, 29.6, 16.3

**IR (KBr)** 2924, 1653, 1606, 1541, 1458, 1298, 1155, 754  $\text{cm}^{-1}$

**HRMS for  $\text{C}_{15}\text{H}_{14}\text{N}_3\text{O}_2^+(\text{M}^+\text{+H})$ :** calcd. 268.10805, found 268.10760

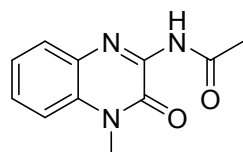

**6**

N-(4-methyl-3-oxo-3,4-dihydroquinoxalin-2-yl)acetamide

Purified by flash chromatograph column ( $\text{CH}_2\text{Cl}_2$  : EtOAc = 10 : 1). Yellow solid. mp 208-210 °C <sup>[1]</sup>

**$^1\text{H}$  NMR (400 MHz,  $\text{CDCl}_3$ )**  $\delta$  9.02 (s, 1H), 7.75 (dd,  $J = 8.0$ , 1.2 Hz, 1H), 7.49 – 7.45 (m, 1H), 7.38 –

7.34 (m, 1H), 7.29 (d,  $J = 8.4$  Hz, 1H), 3.76 (s, 3H), 2.61 (s, 3H)

$^{13}\text{C}$  NMR (100 MHz,  $\text{CDCl}_3$ )  $\delta$  170.5, 151.1, 144.2, 131.8, 131.1, 128.8, 128.2, 124.7, 113.8, 30.0, 25.8

## Reference

[1] J. Yuan, S. Liu, Y. Xiao, P. Mao, L. Yang and L. Qu, *Org. Biomol. Chem.*, 2019, **17**, 876

## 3 General procedure for antiproliferative activity assays

Exponentially growing cells were seeded into 96-well plates at a concentration of  $5 \times 10^3$  cells per well. After 24 h incubation at 37 °C, the culture medium was removed and replaced with fresh medium containing the candidate compounds in different concentrations. The cells were incubated for another 72 h. Afterward, 20  $\mu\text{L}$  of MTT solution (5 mg/mL) was added to all wells and incubated for 4 h at 37 °C. Discarded the suspension and added 150  $\mu\text{L}$  of dimethyl sulfoxide (DMSO) to each well and shook the plates to dissolve the dark blue crystals (formazan); the absorbance was measured using a microplate reader at a wavelength of 562 nm. Each concentration was analyzed in triplicate and the experiment was repeated three times. The average 50% inhibitory concentration ( $\text{IC}_{50}$ ) was determined from the dose-response curves according to the inhibition ratio for each concentration.

*In vitro* antiproliferative activity of products on EC109 (human esophageal carcinoma), Te-1 (human esophageal carcinoma), BGC-823 (human gastric carcinoma), and MGC-803 (human gastric carcinoma)

| Compound  | $\text{IC}_{50}$ ( $\mu\text{M}$ ) |      |                  |                  |
|-----------|------------------------------------|------|------------------|------------------|
|           | EC109                              | Te-1 | BGC-823          | MGC-803          |
| <b>3a</b> | >128                               | >128 | 97.4 $\pm$ 13.1  | 110.9 $\pm$ 14.3 |
| <b>3c</b> | >128                               | >128 | 113.7 $\pm$ 20.1 | 117 $\pm$ 18.8   |
| <b>3e</b> | >128                               | >128 | 102.2 $\pm$ 14.2 | 103.3 $\pm$ 16.3 |
| <b>3f</b> | >128                               | >128 | 115.8 $\pm$ 21.0 | 108.8 $\pm$ 17.5 |
| <b>3g</b> | >128                               | >128 | 95.2 $\pm$ 7.3   | 80.3 $\pm$ 12.1  |
| <b>3h</b> | >128                               | >128 | 26.4 $\pm$ 4.3   | 28.2 $\pm$ 6.6   |
| <b>3j</b> | >128                               | >128 | >128             | 107.2 $\pm$ 14.7 |
| <b>3k</b> | >128                               | >128 | 118.0 $\pm$ 18.5 | 117.5 $\pm$ 20.3 |
| <b>3l</b> | >128                               | >128 | 111.8 $\pm$ 22.7 | 112.5 $\pm$ 16.2 |
| <b>5c</b> | >128                               | >128 | >128             | 121.1 $\pm$ 17.3 |
| <b>5e</b> | >128                               | >128 | 107.7 $\pm$ 19.6 | 104.8 $\pm$ 10.3 |

|           |            |      |            |            |
|-----------|------------|------|------------|------------|
| <b>5f</b> | >128       | >128 | 108.1±17.8 | 112.0±9.4  |
| <b>5g</b> | >128       | >128 | 114.3±20.8 | 121.2±19.3 |
| <b>5h</b> | >128       | >128 | 117.5±24.4 | 90.1±11.1  |
| <b>5j</b> | 100.9±13.8 | >128 | 101.3±16.8 | 82.3±13.8  |

---

#### **4 Copies of <sup>1</sup>H and <sup>13</sup>C NMR Spectra**

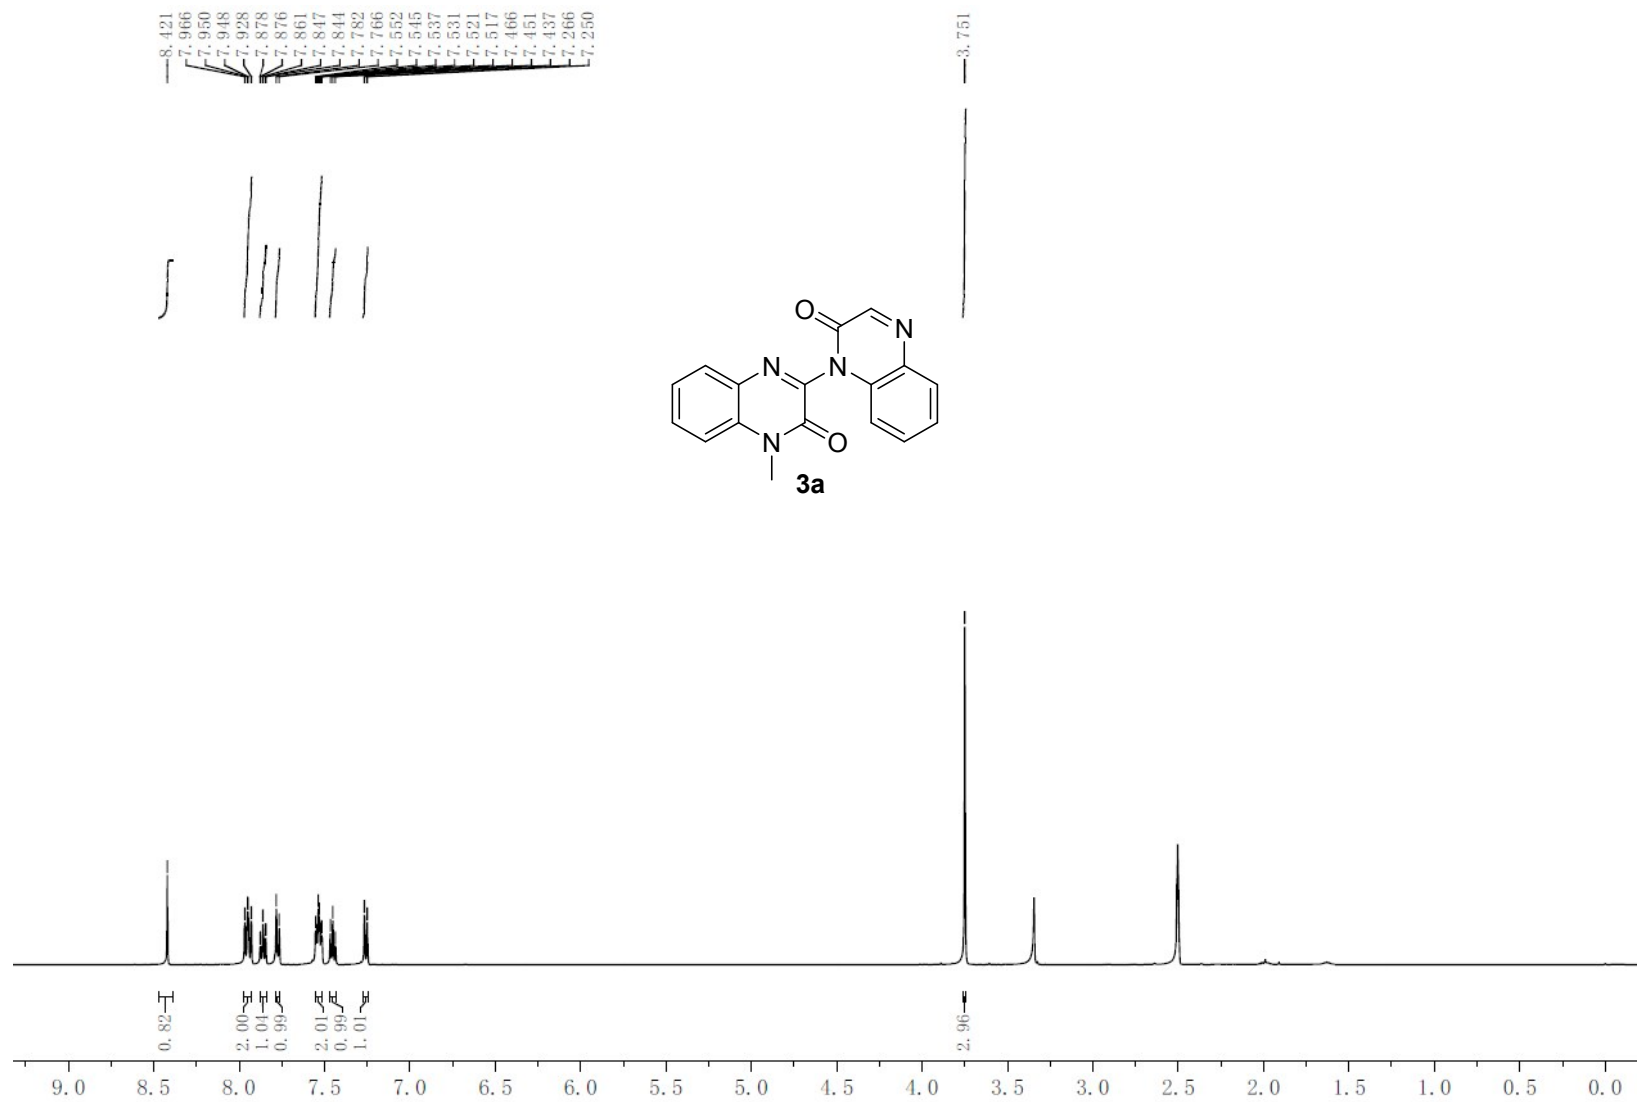

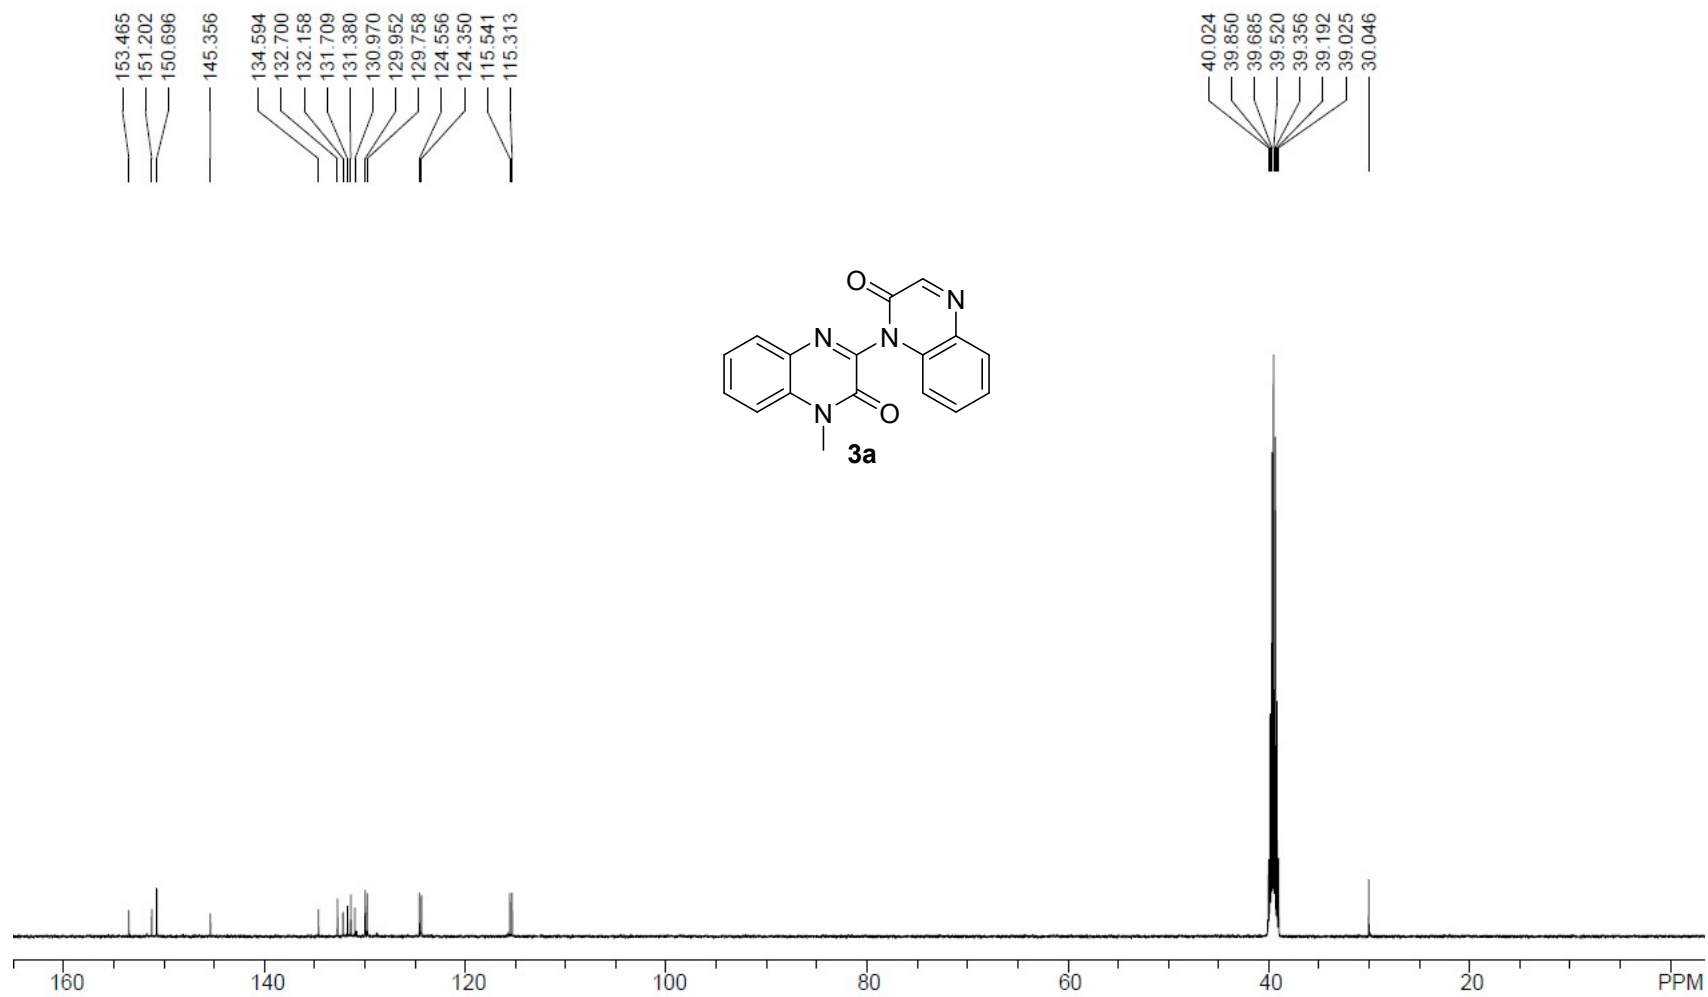

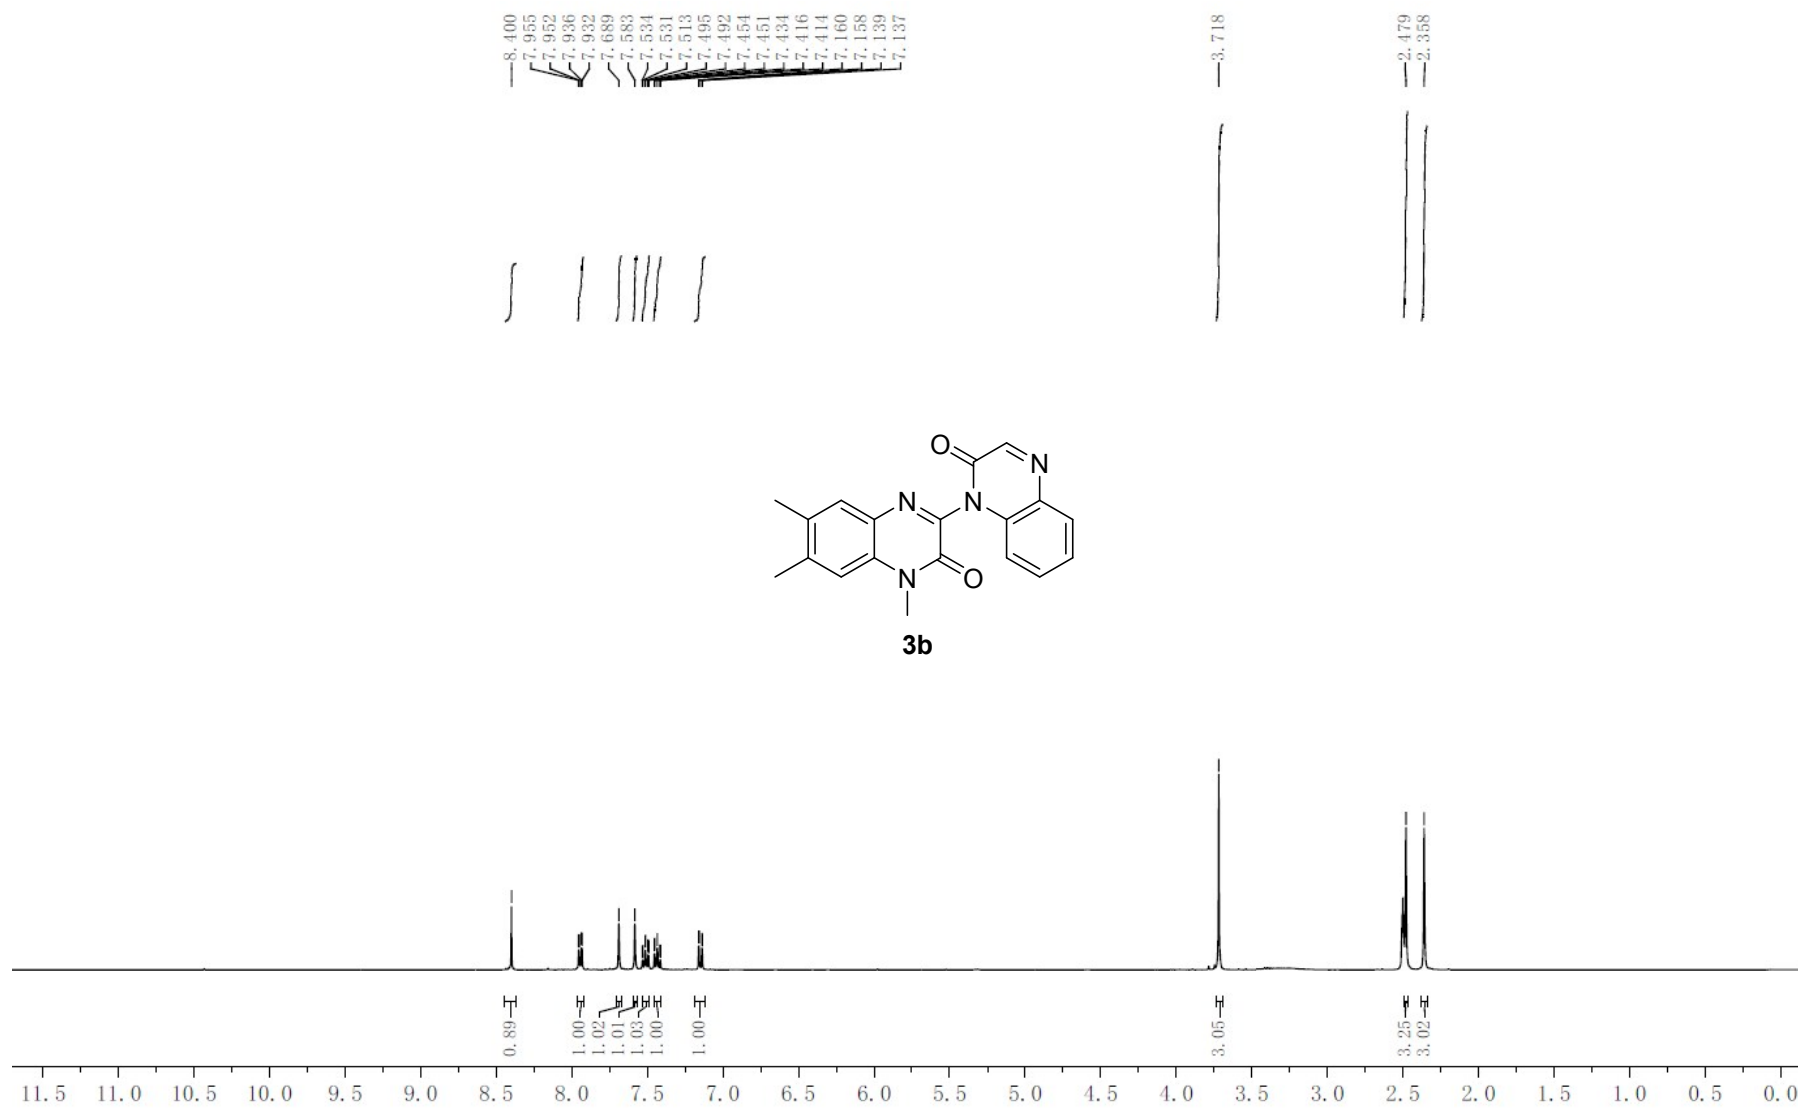



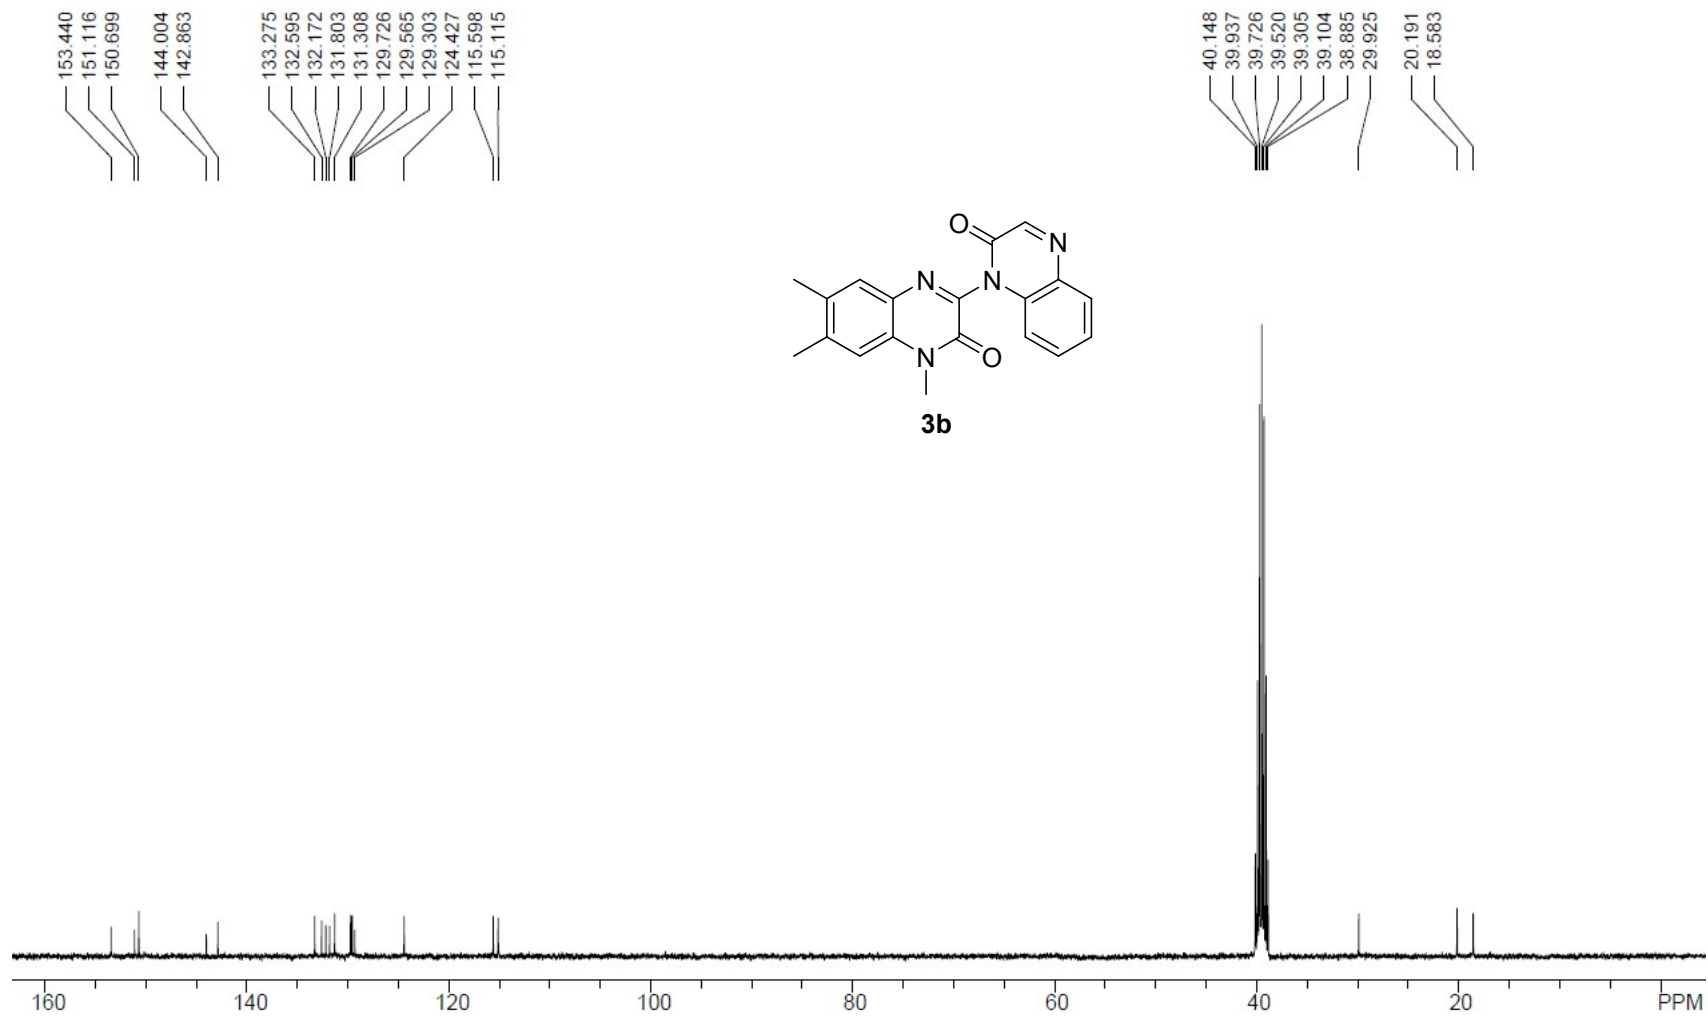

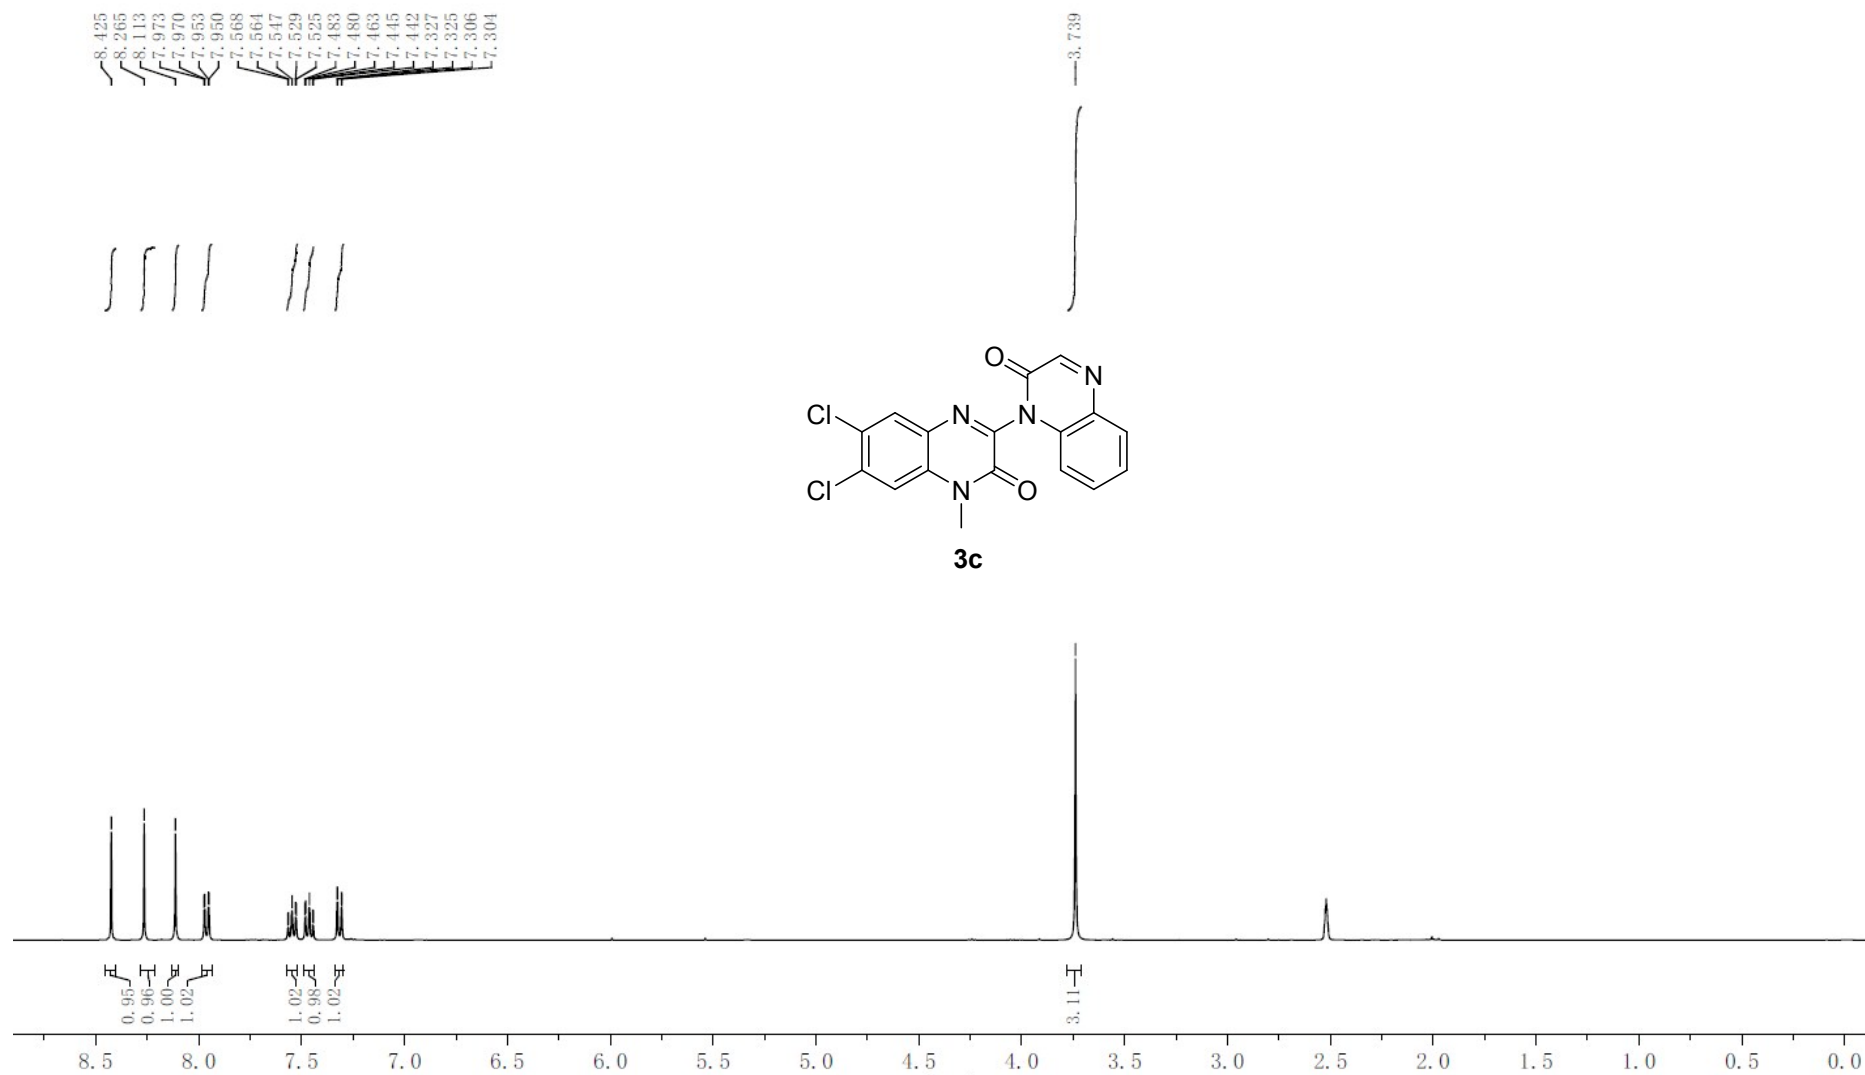

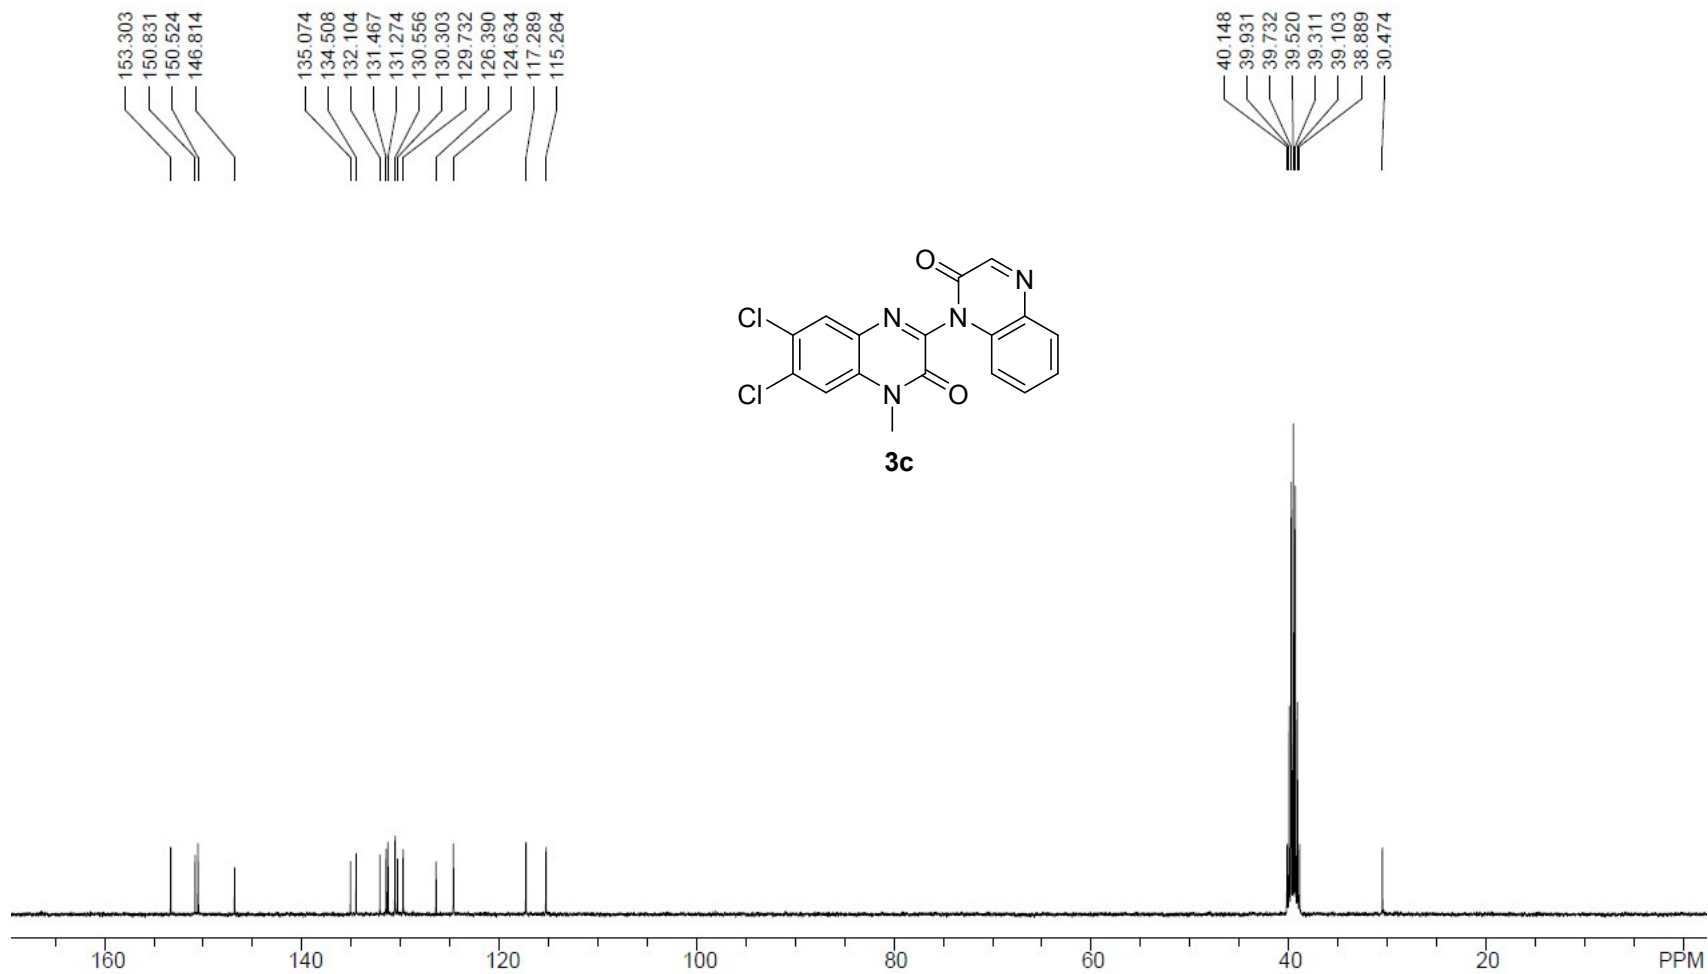

8.455  
8.058  
8.053  
8.005  
8.003  
7.986  
7.983  
7.908  
7.887  
7.748  
7.743  
7.726  
7.722  
7.597  
7.594  
7.576  
7.558  
7.555  
7.512  
7.509  
7.492  
7.474  
7.472  
7.329  
7.308

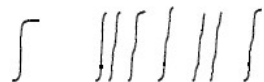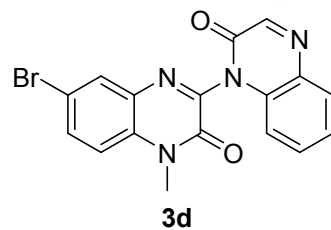

3.771

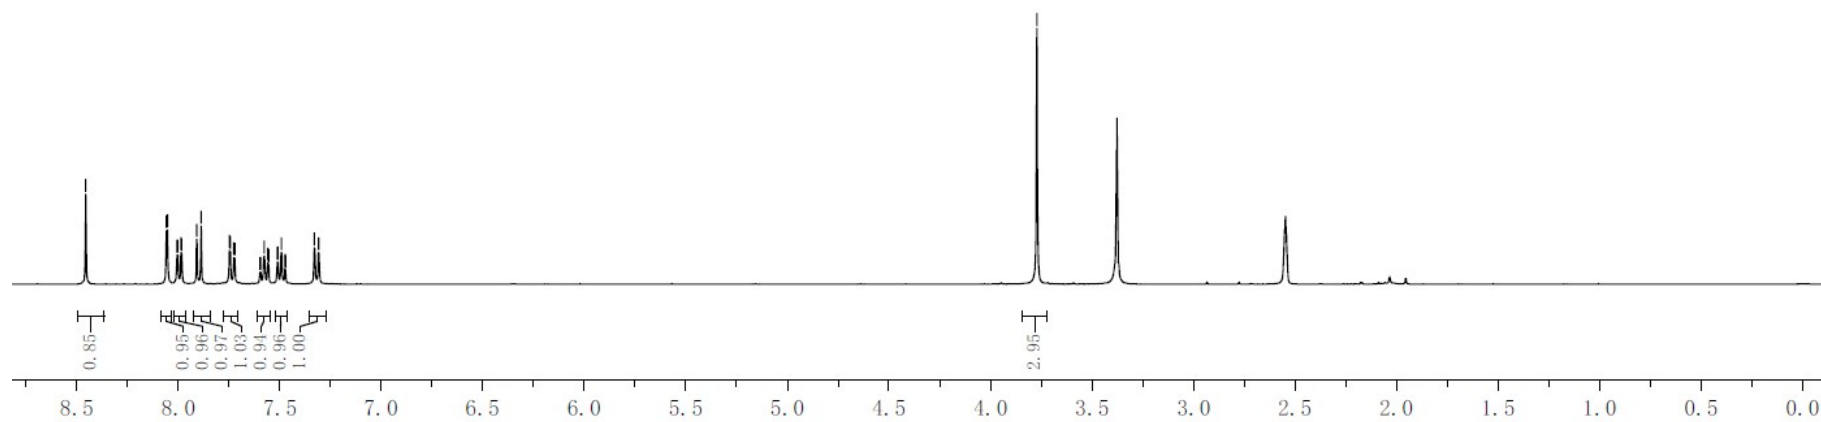

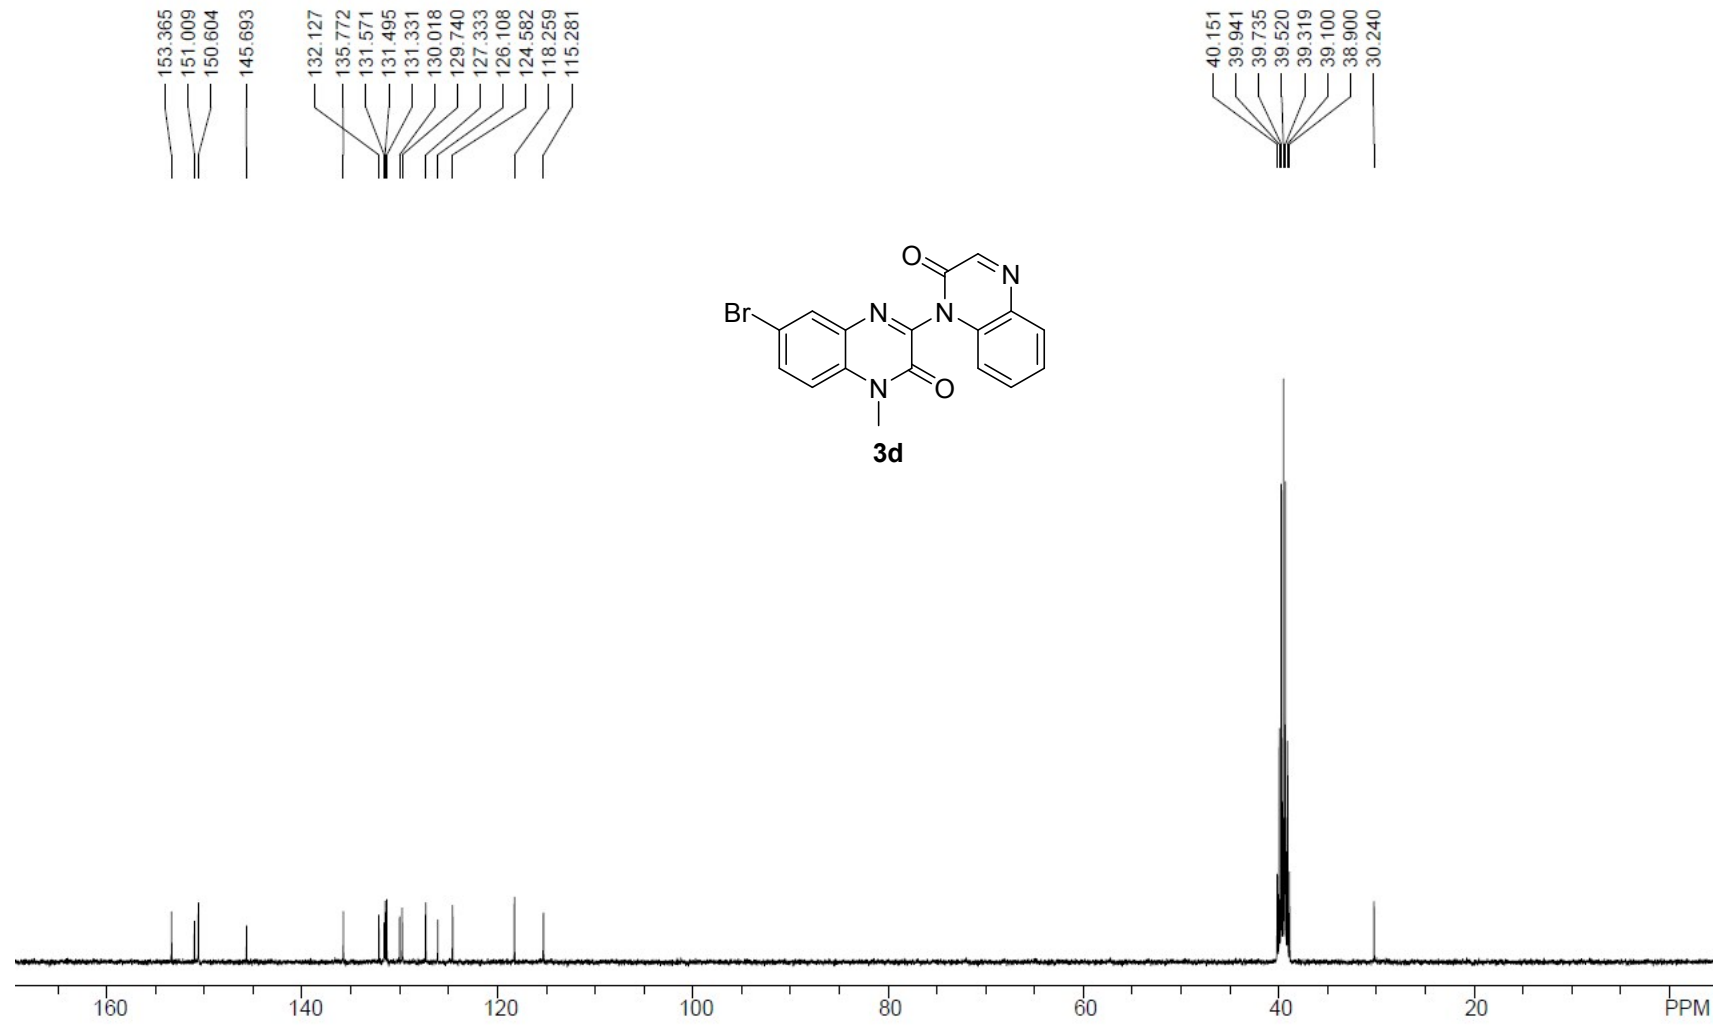

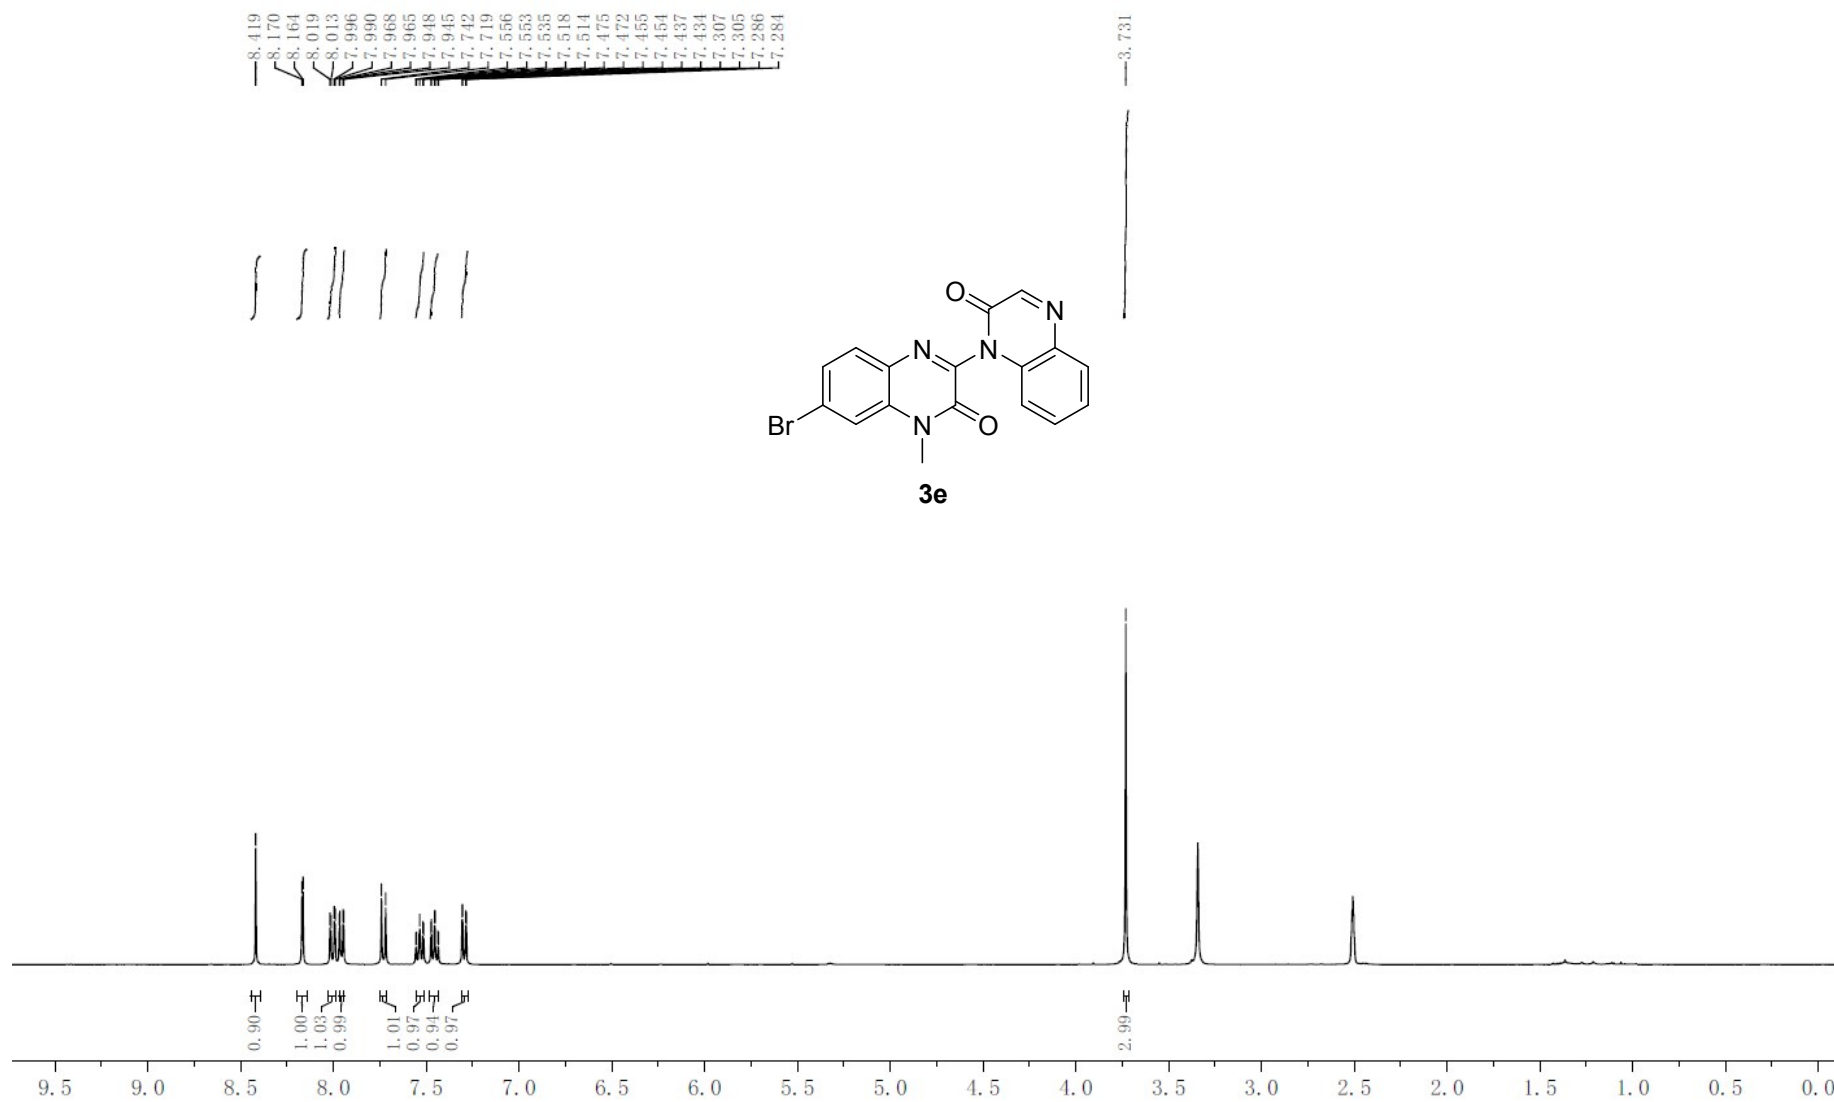

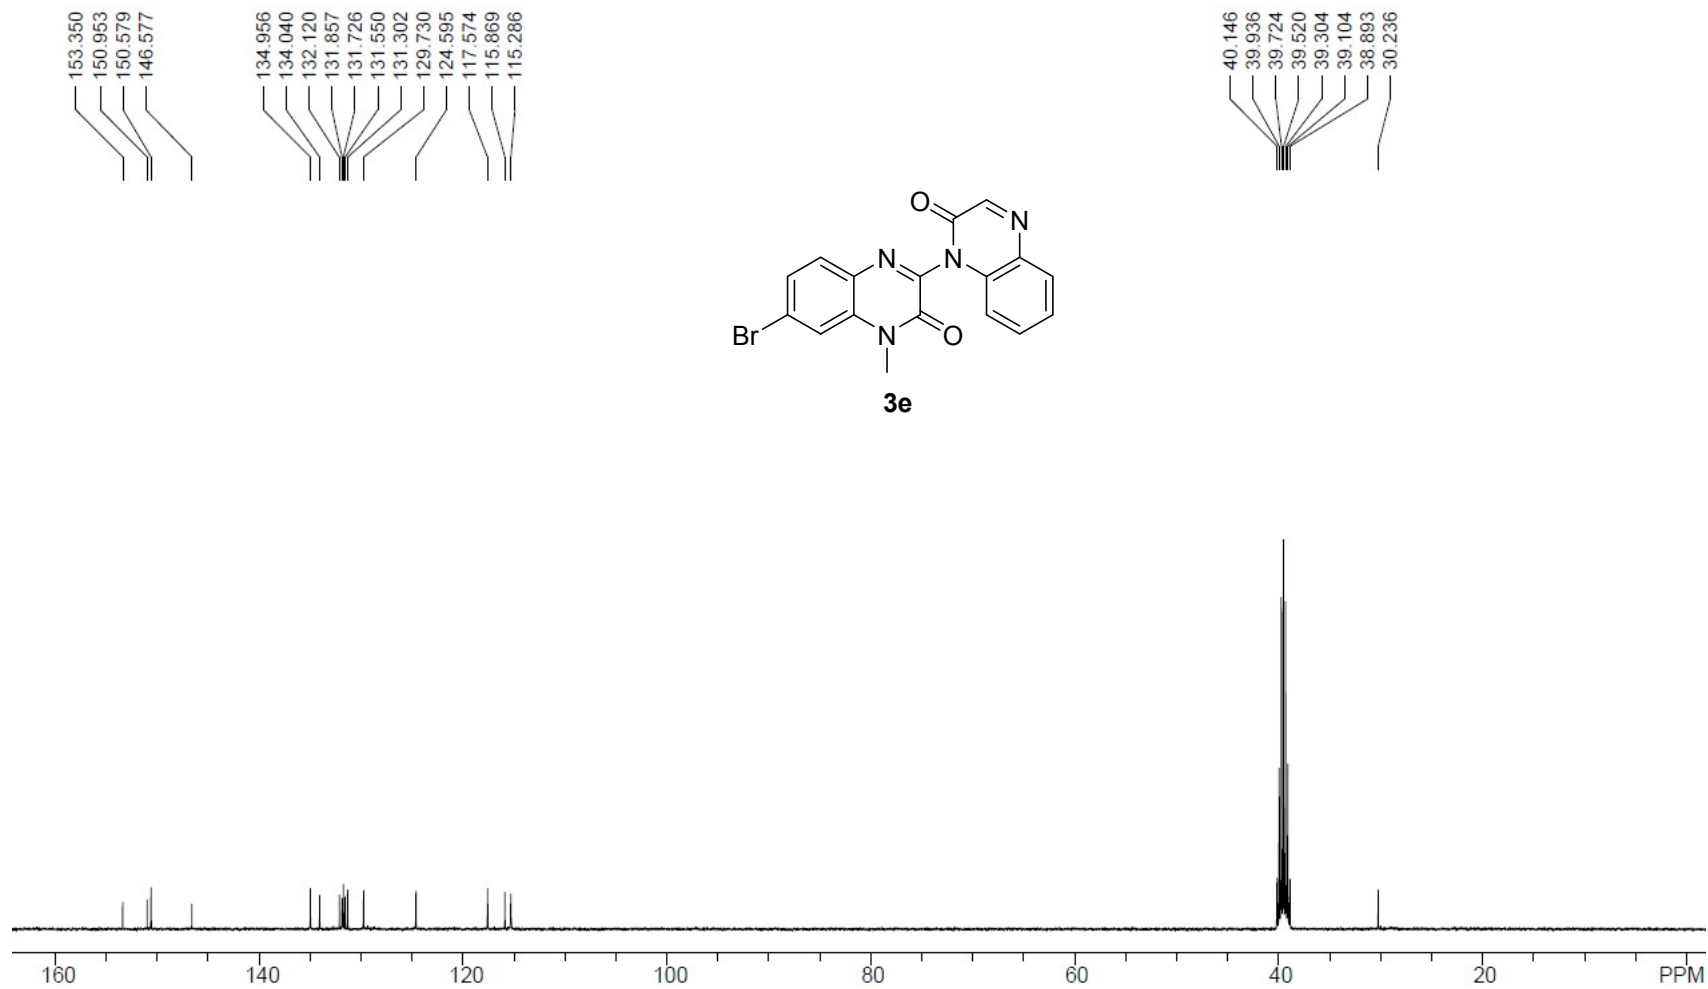

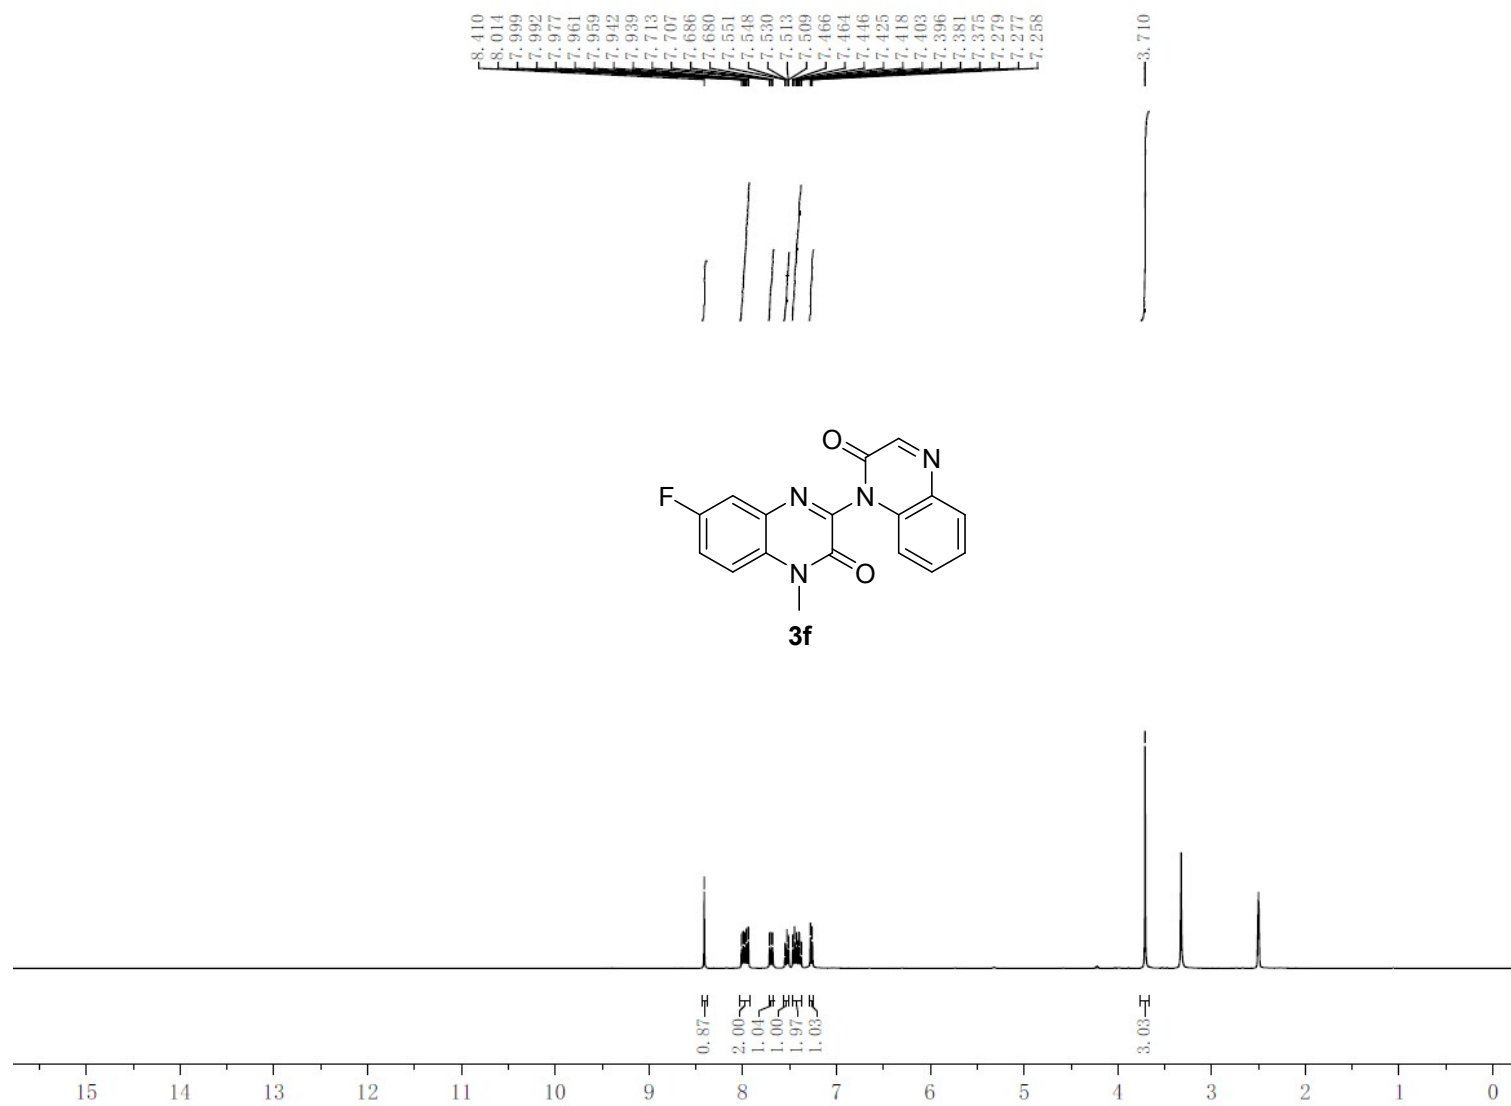



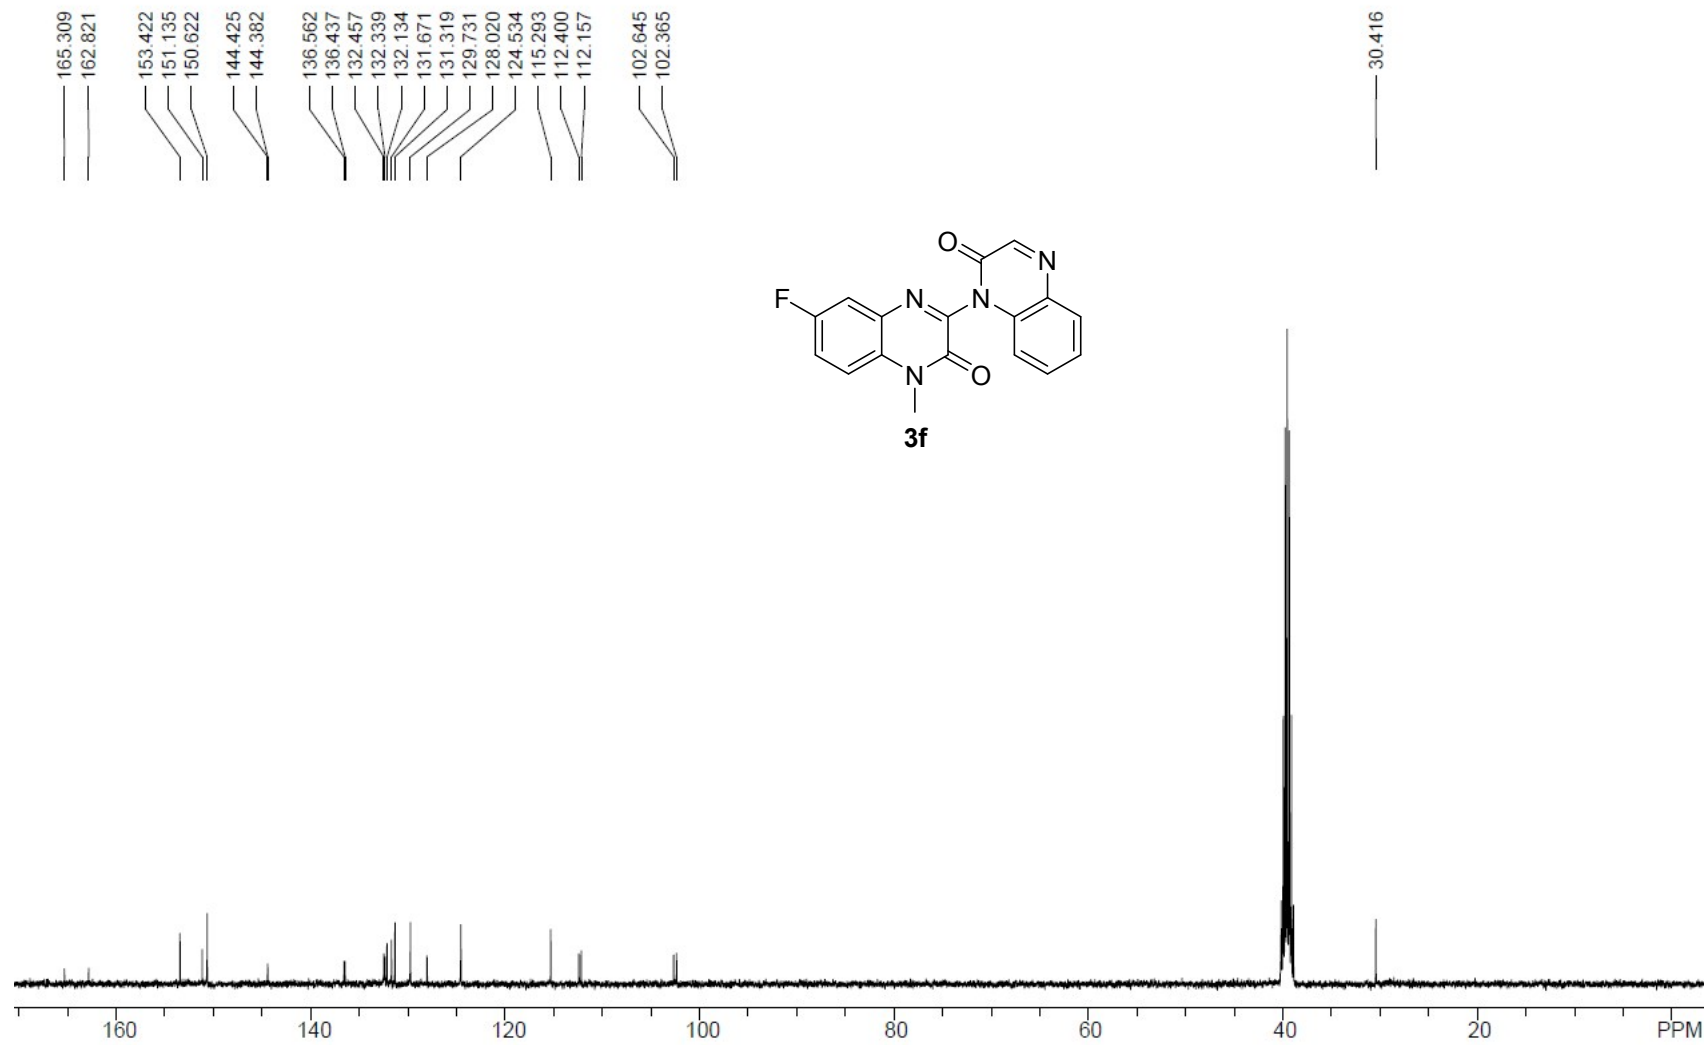

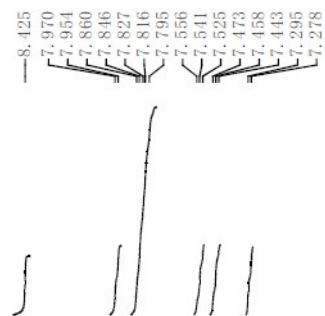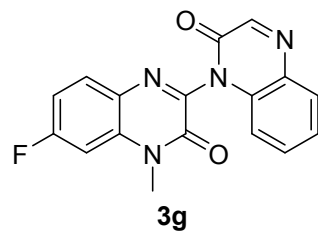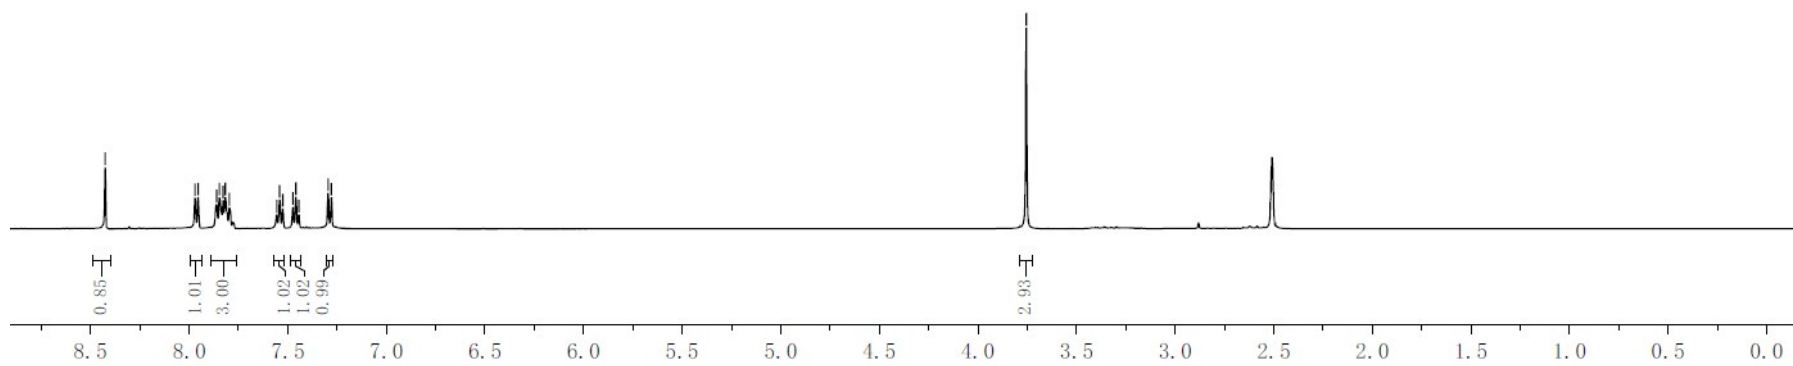

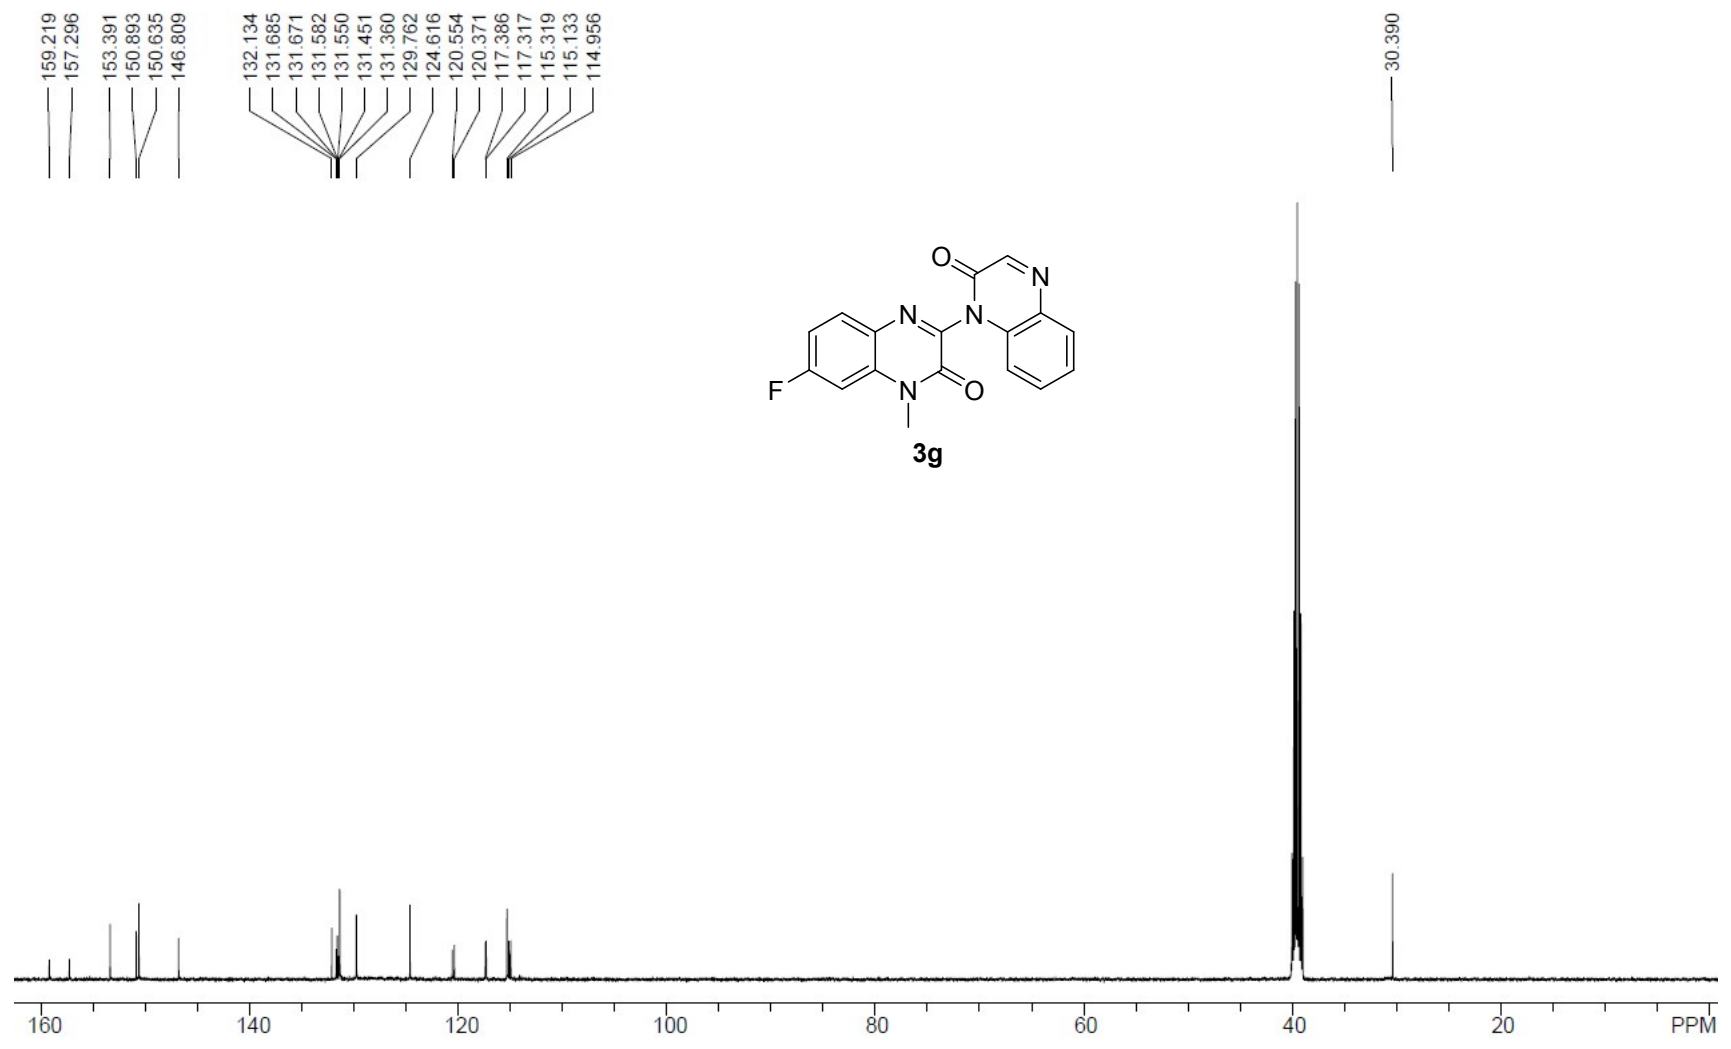

8.715  
8.631  
8.627  
8.612  
8.609  
8.435  
7.981  
7.963  
7.570  
7.554  
7.538  
7.486  
7.471  
7.456  
7.390  
7.373

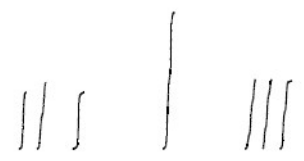

3.792

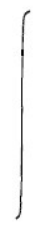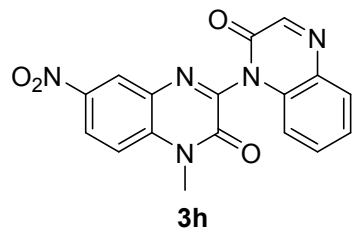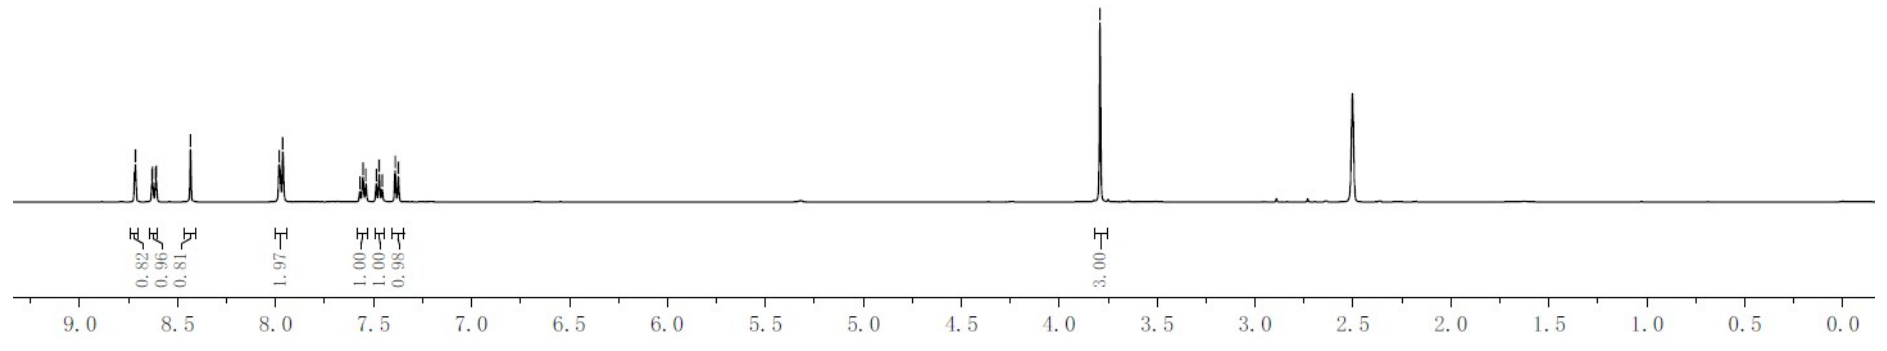

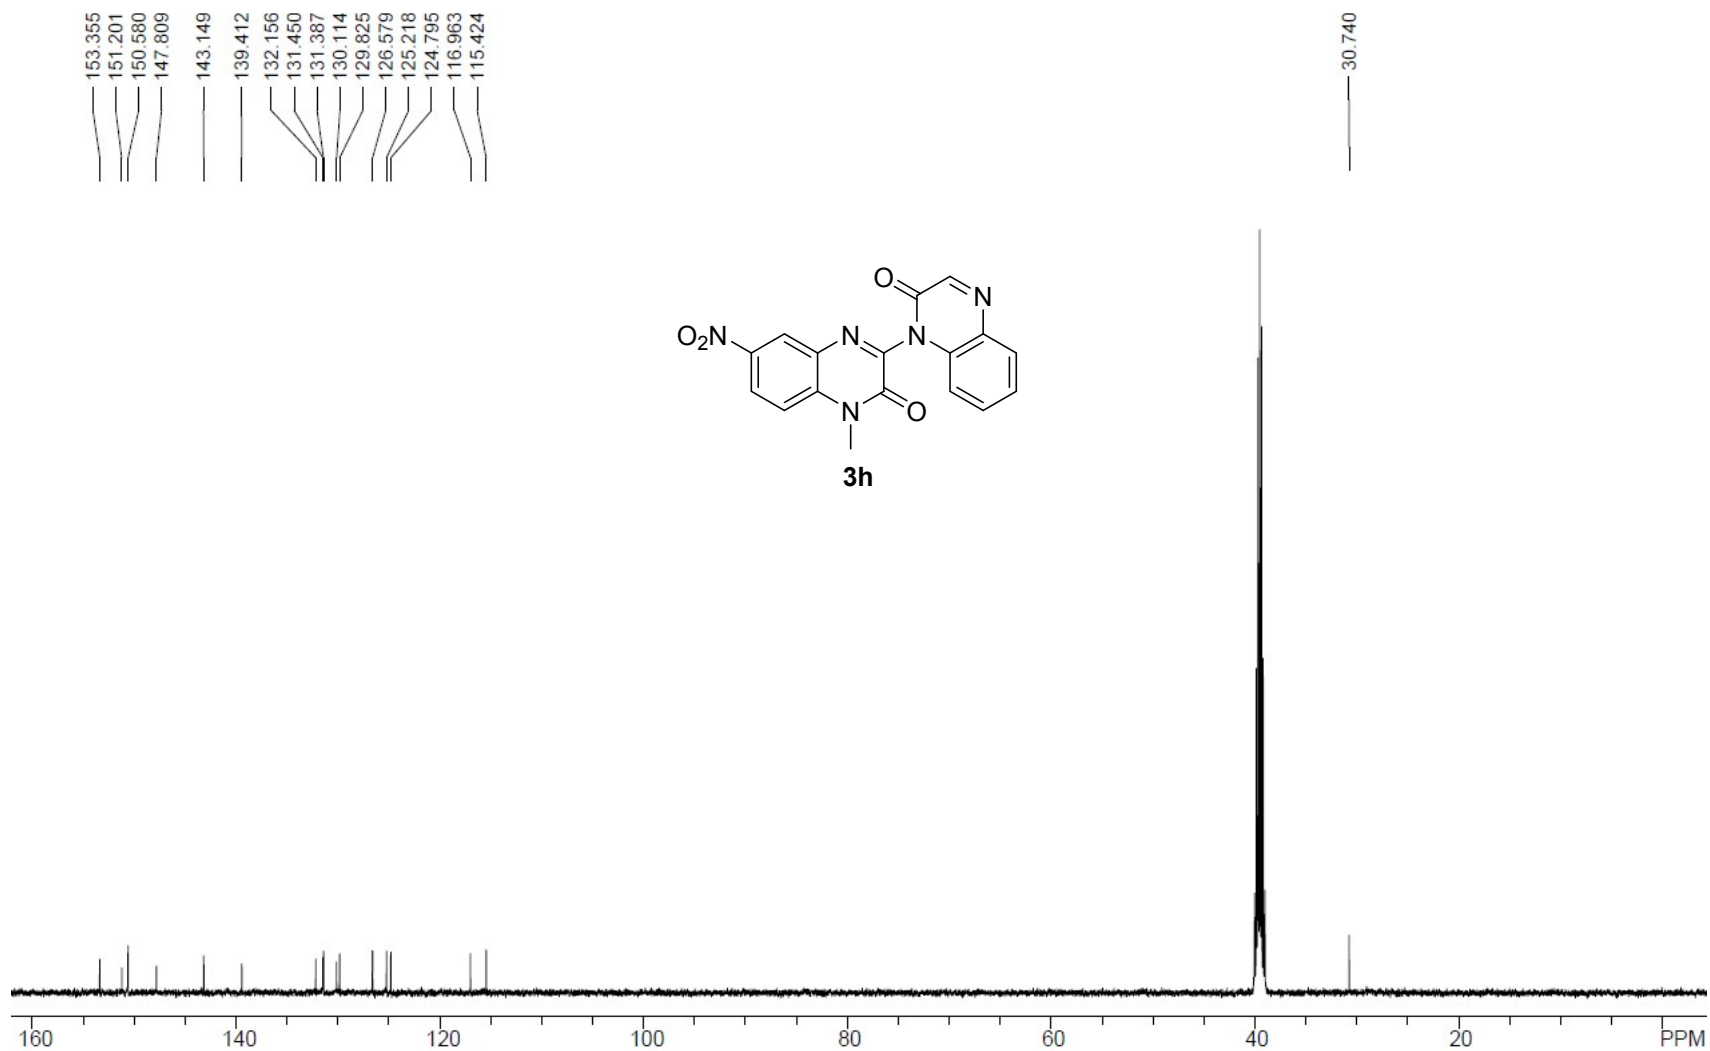

—13.192

8.447  
8.000  
7.982  
7.980  
7.927  
7.907  
7.793  
7.775  
7.756  
7.589  
7.571  
7.552  
7.538  
7.517  
7.503  
7.483  
7.465  
7.316  
7.295

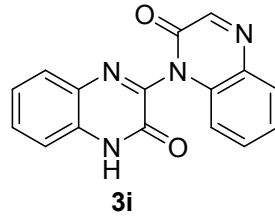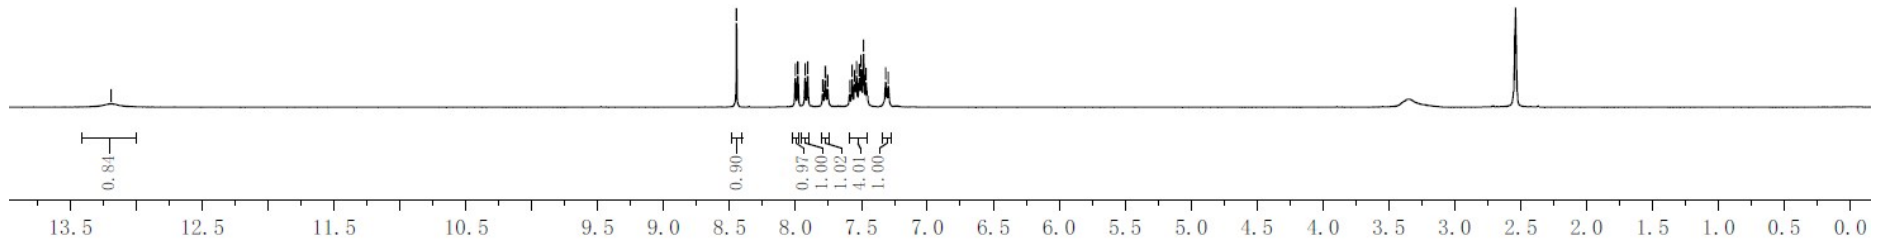

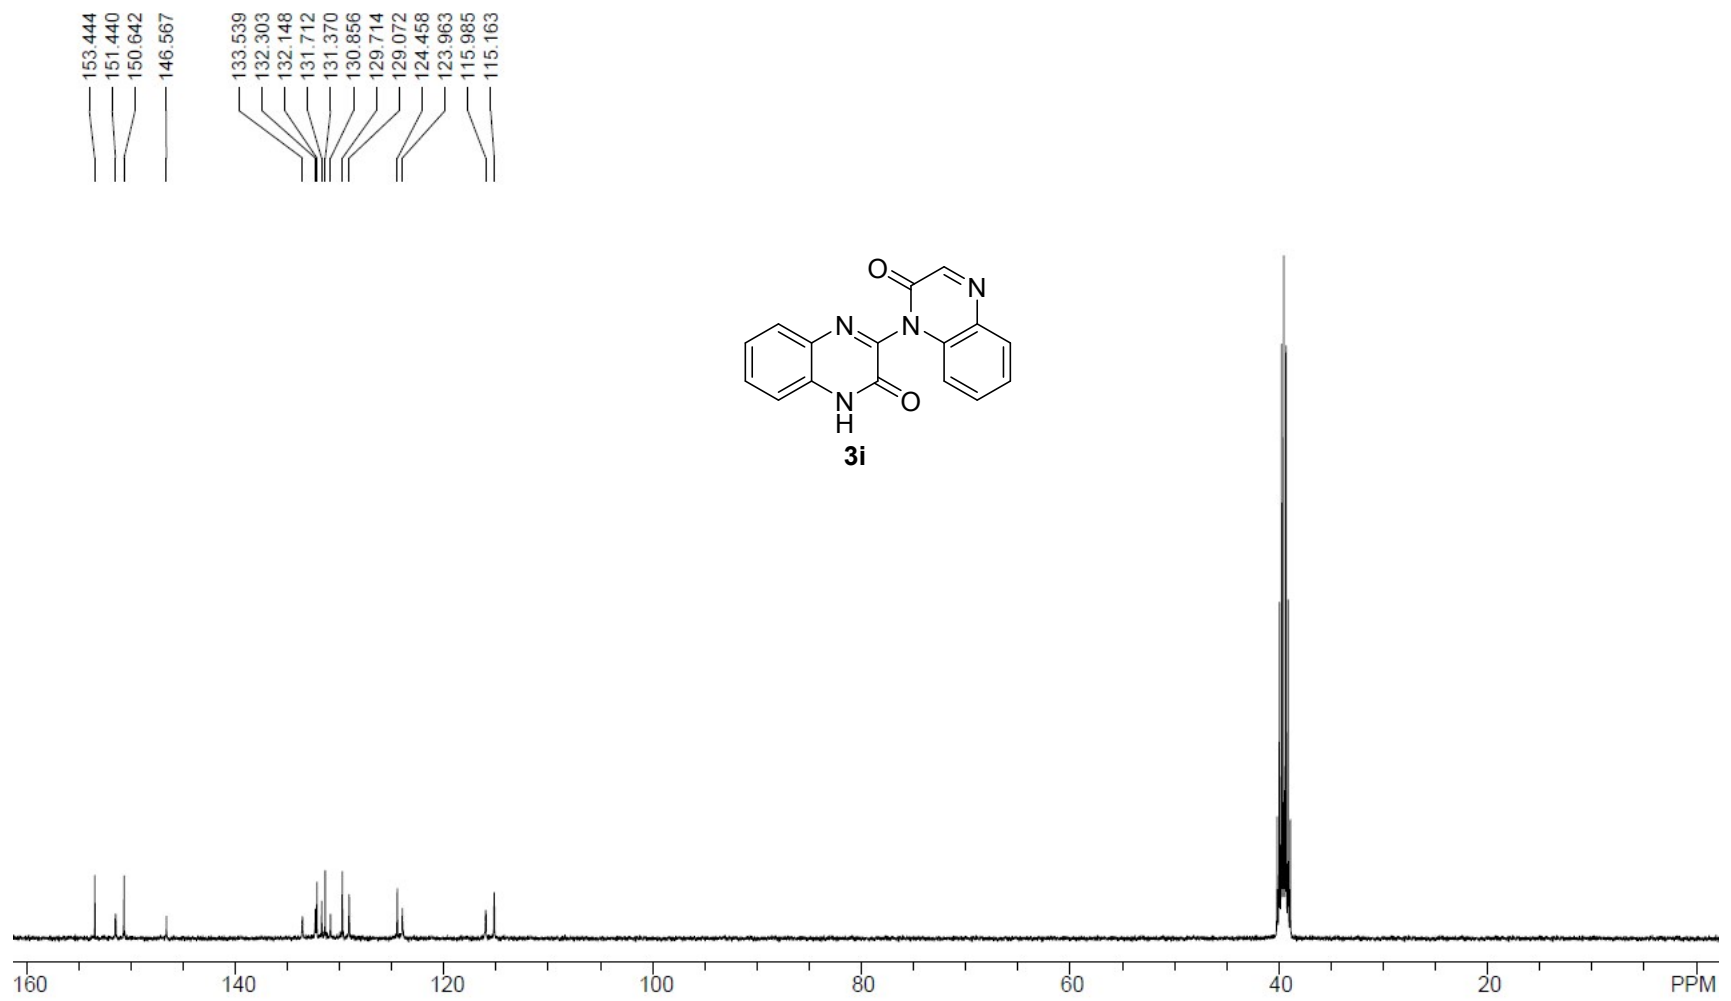

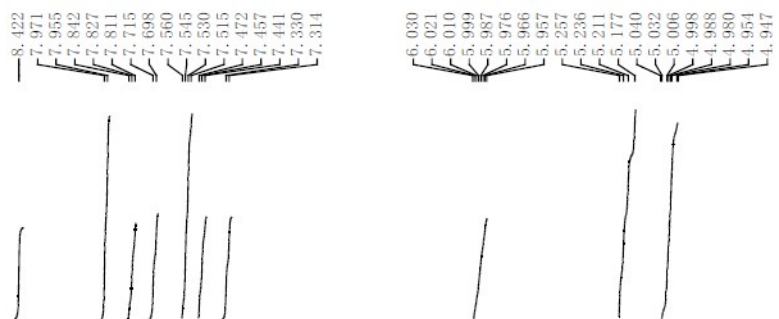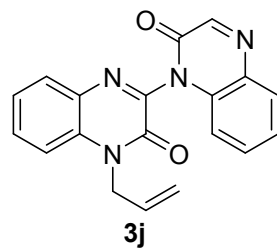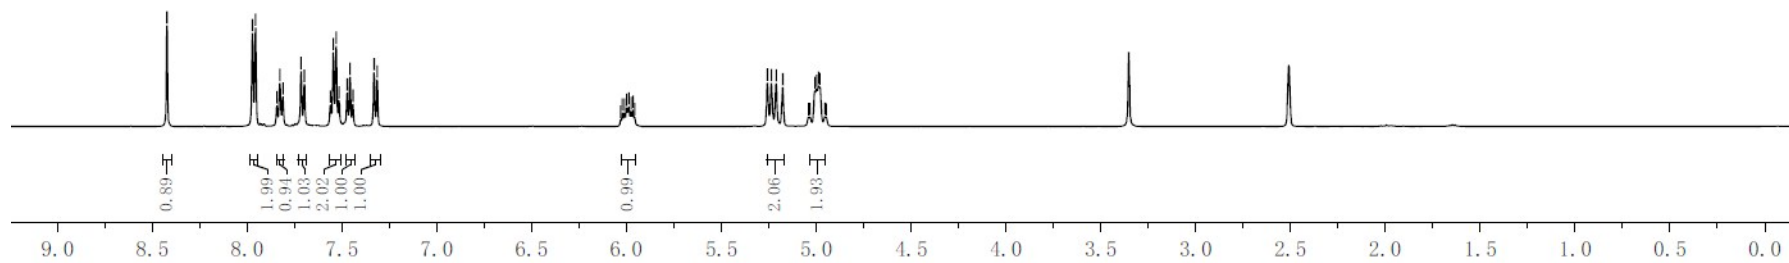



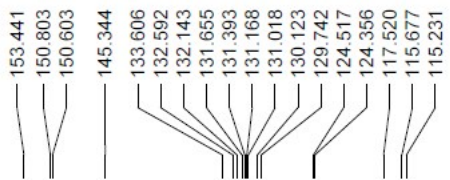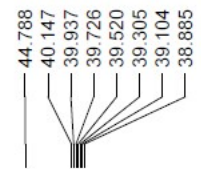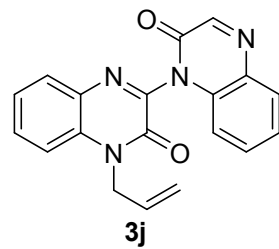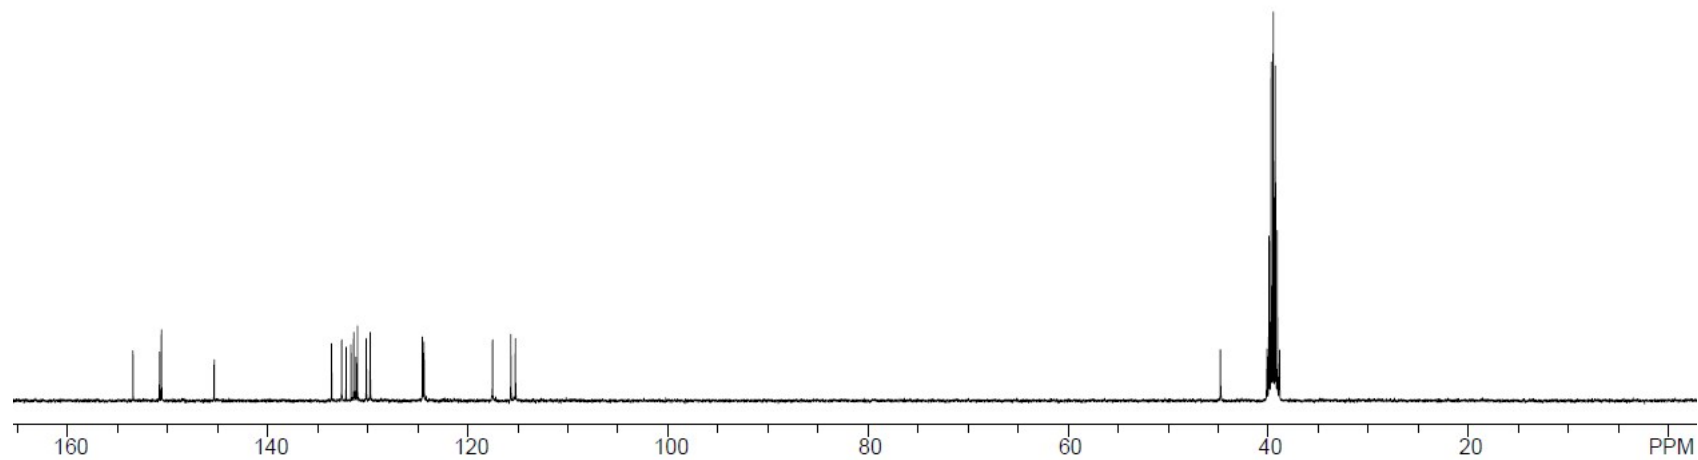

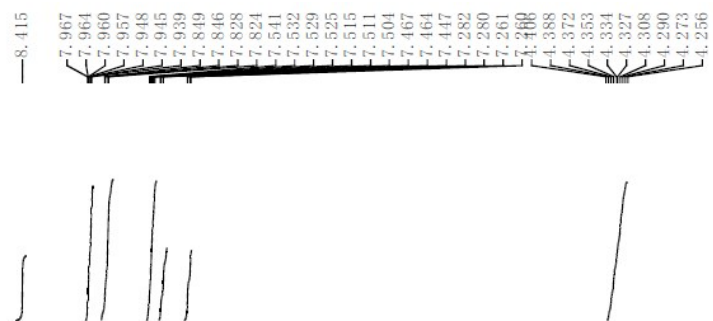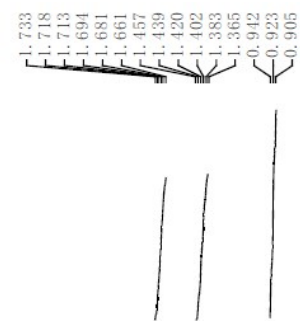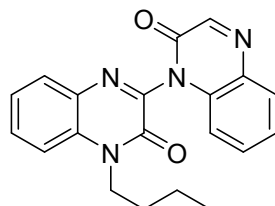

**3k**

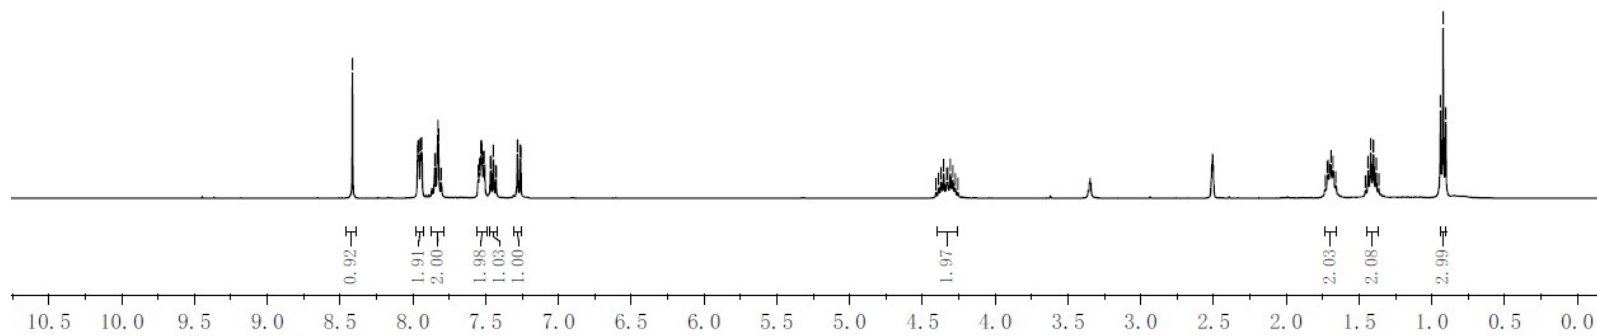

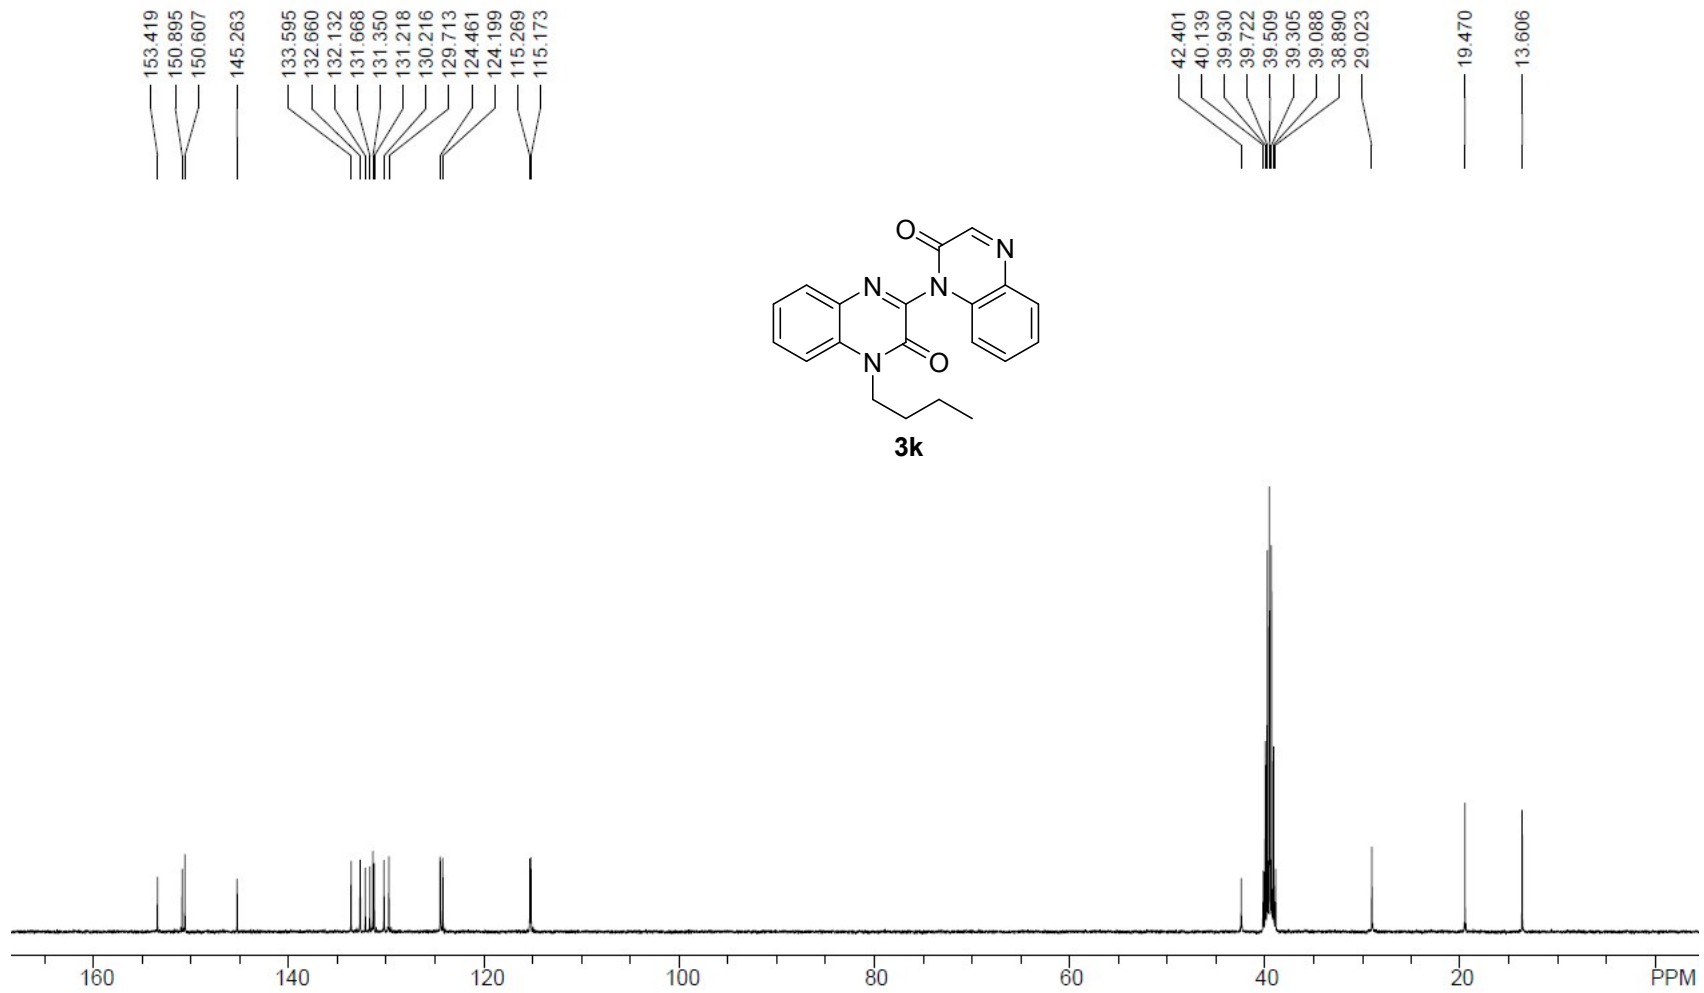

8.477  
8.018  
8.013  
8.001  
7.998  
7.993  
7.990  
7.787  
7.784  
7.769  
7.765  
7.708  
7.688  
7.608  
7.591  
7.587  
7.554  
7.534  
7.520  
7.516  
7.502  
7.485  
7.459  
7.457  
7.438  
7.436  
7.399  
7.388  
7.330  
5.769  
5.727  
5.578  
5.538

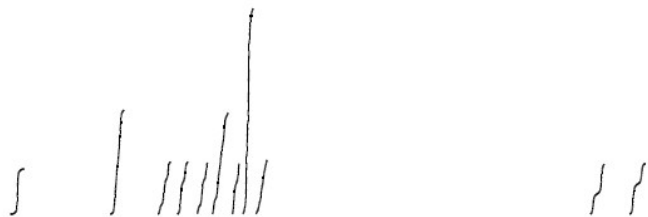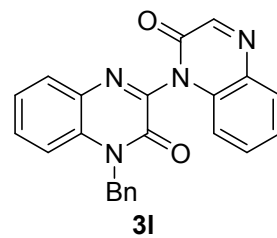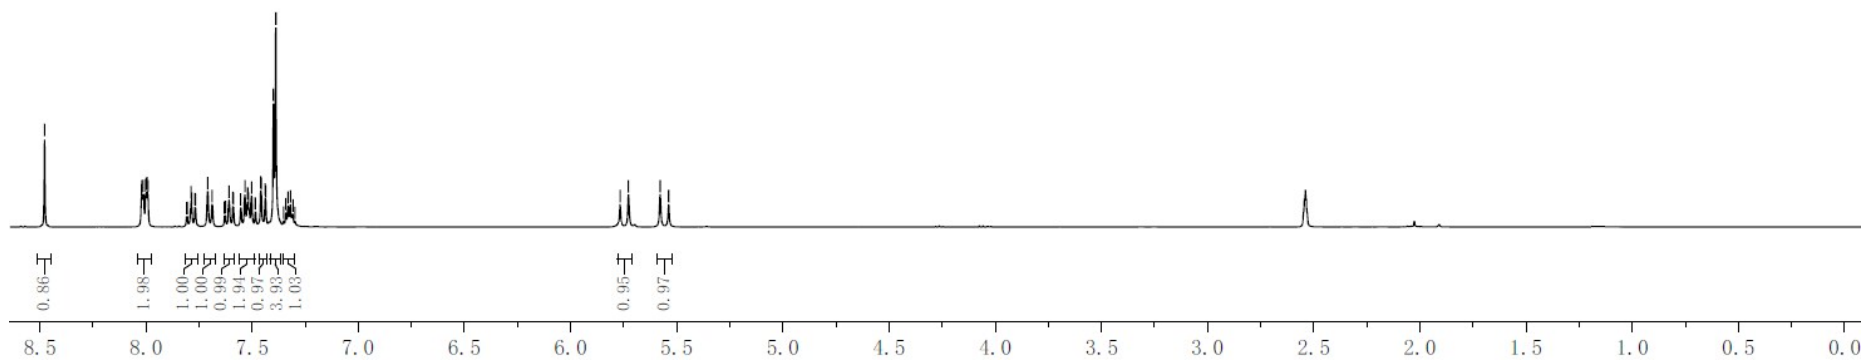

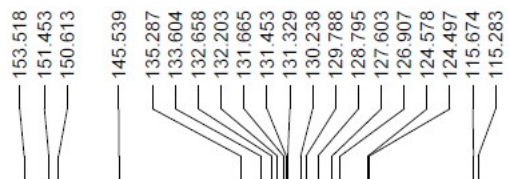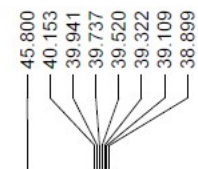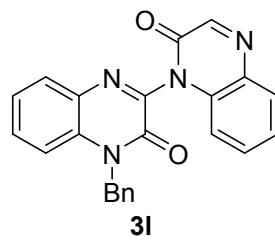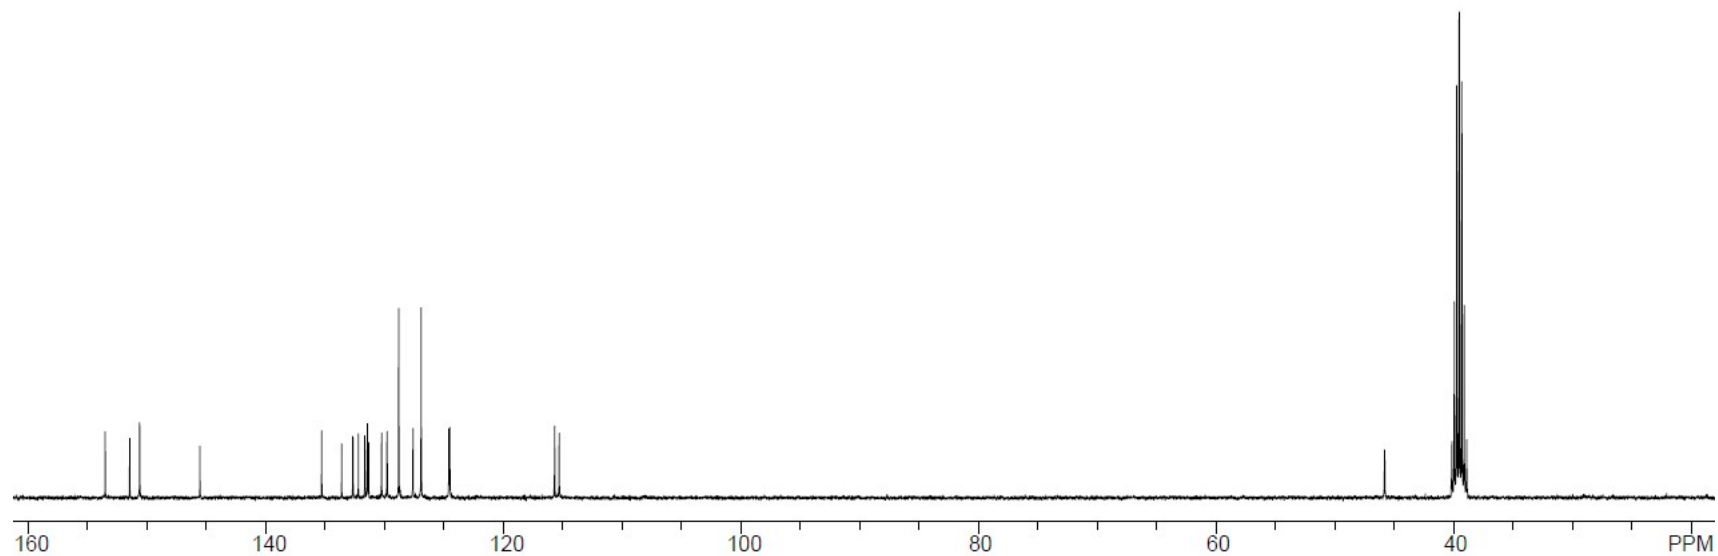

8.292  
7.942  
7.923  
7.872  
7.852  
7.834  
7.781  
7.760  
7.712  
7.548  
7.529  
7.511  
7.060

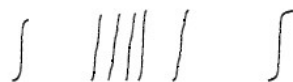

3.747

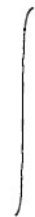

2.310  
2.230

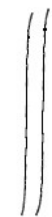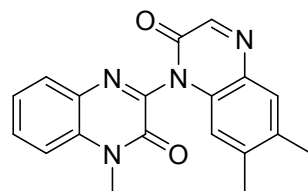

**3m**

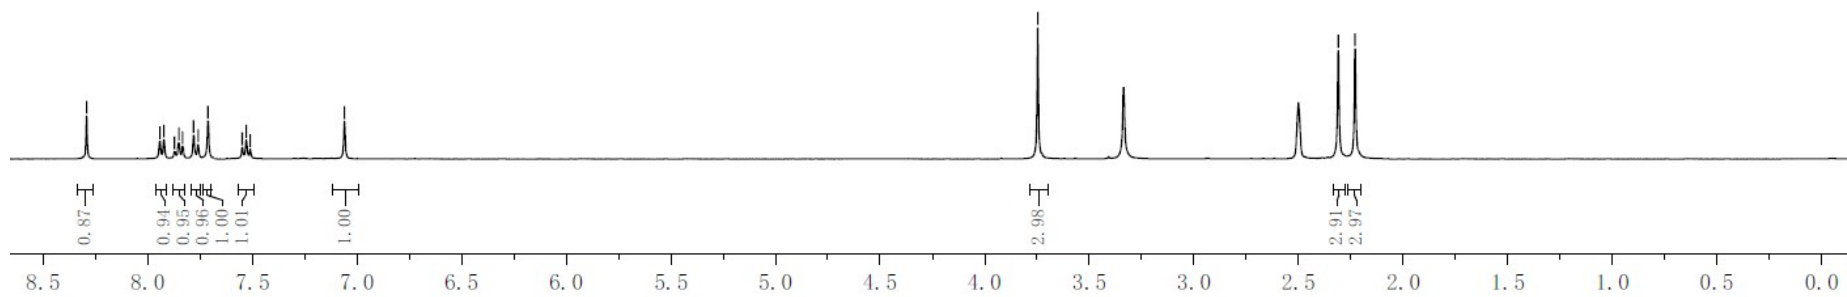

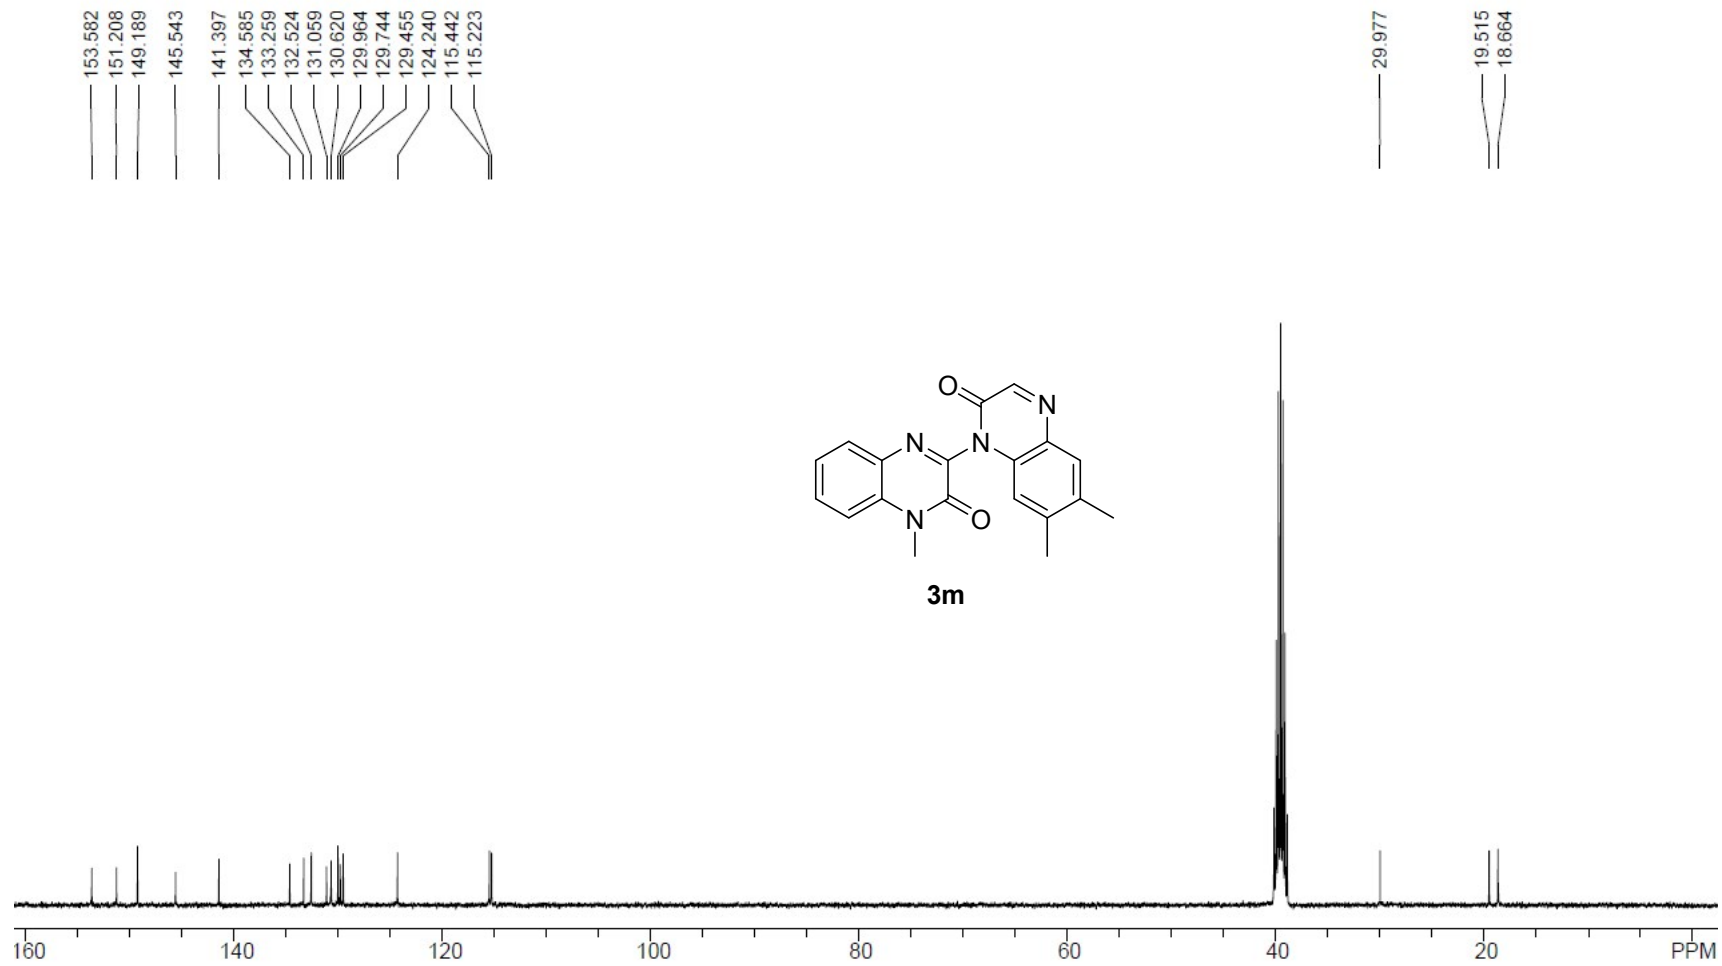

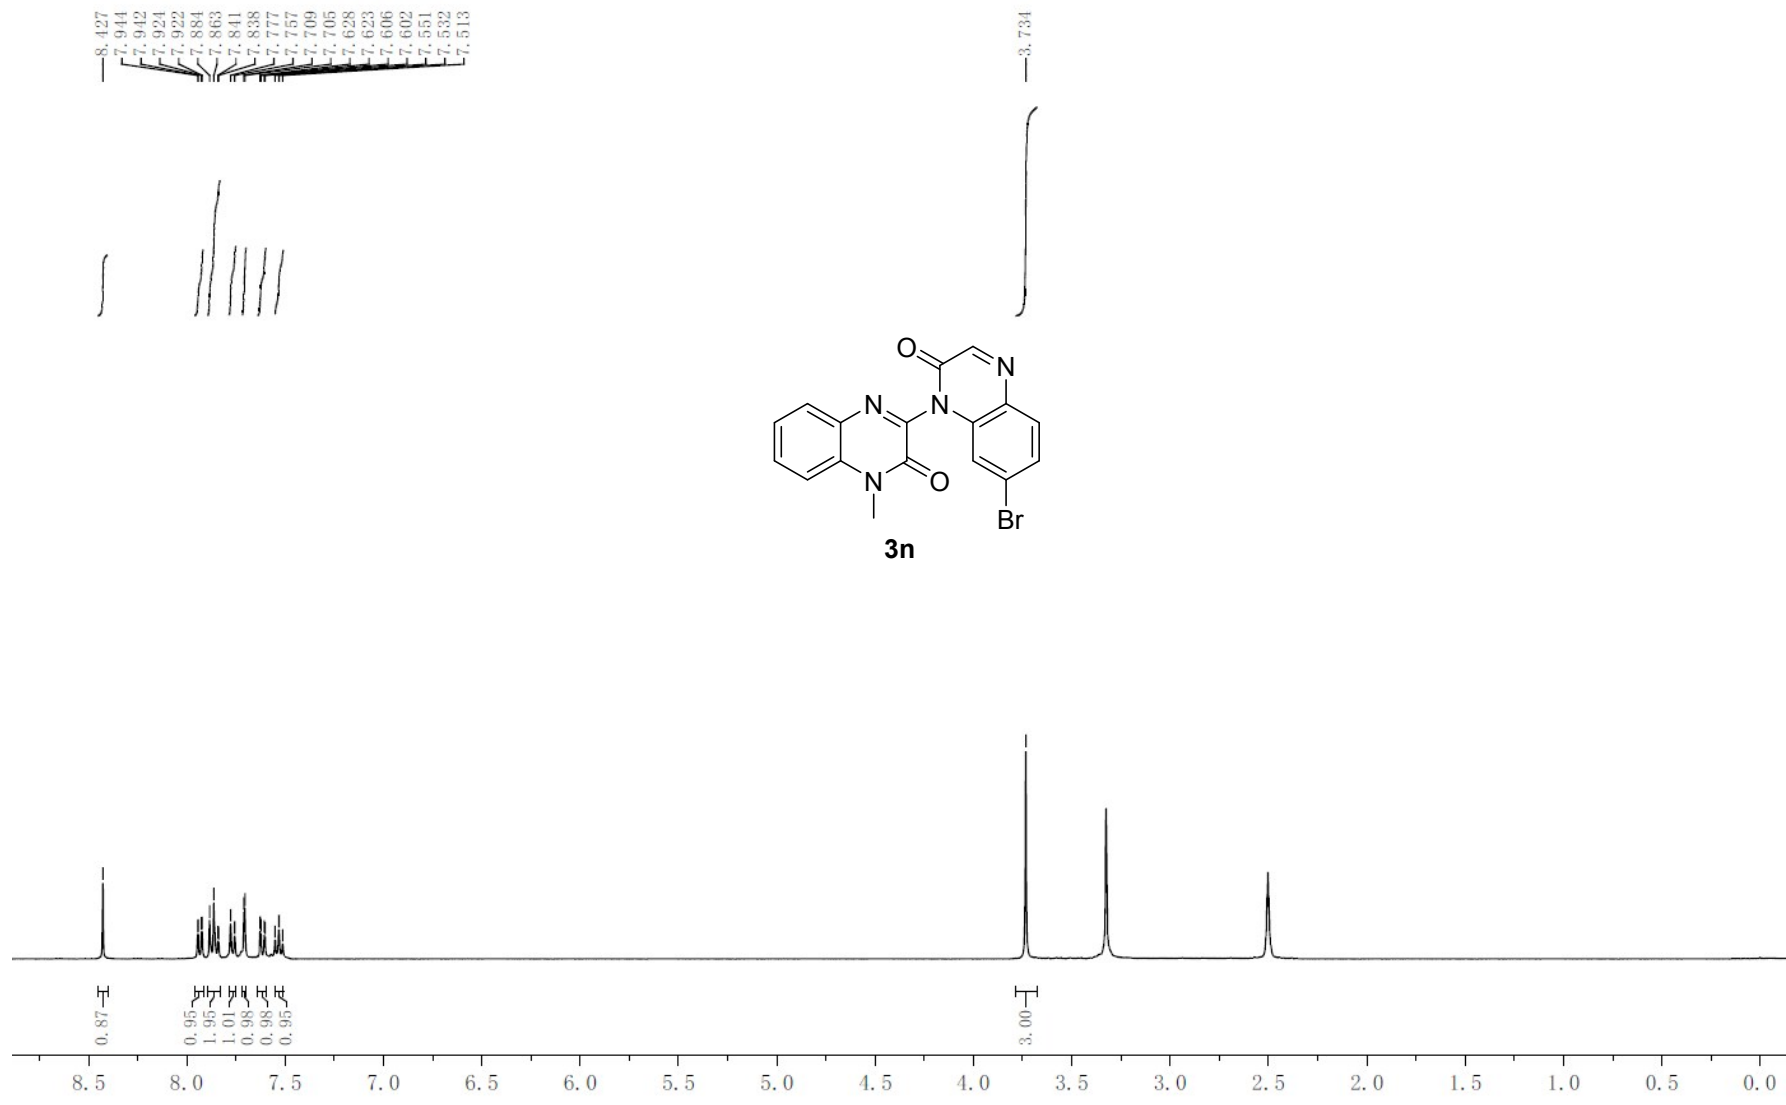



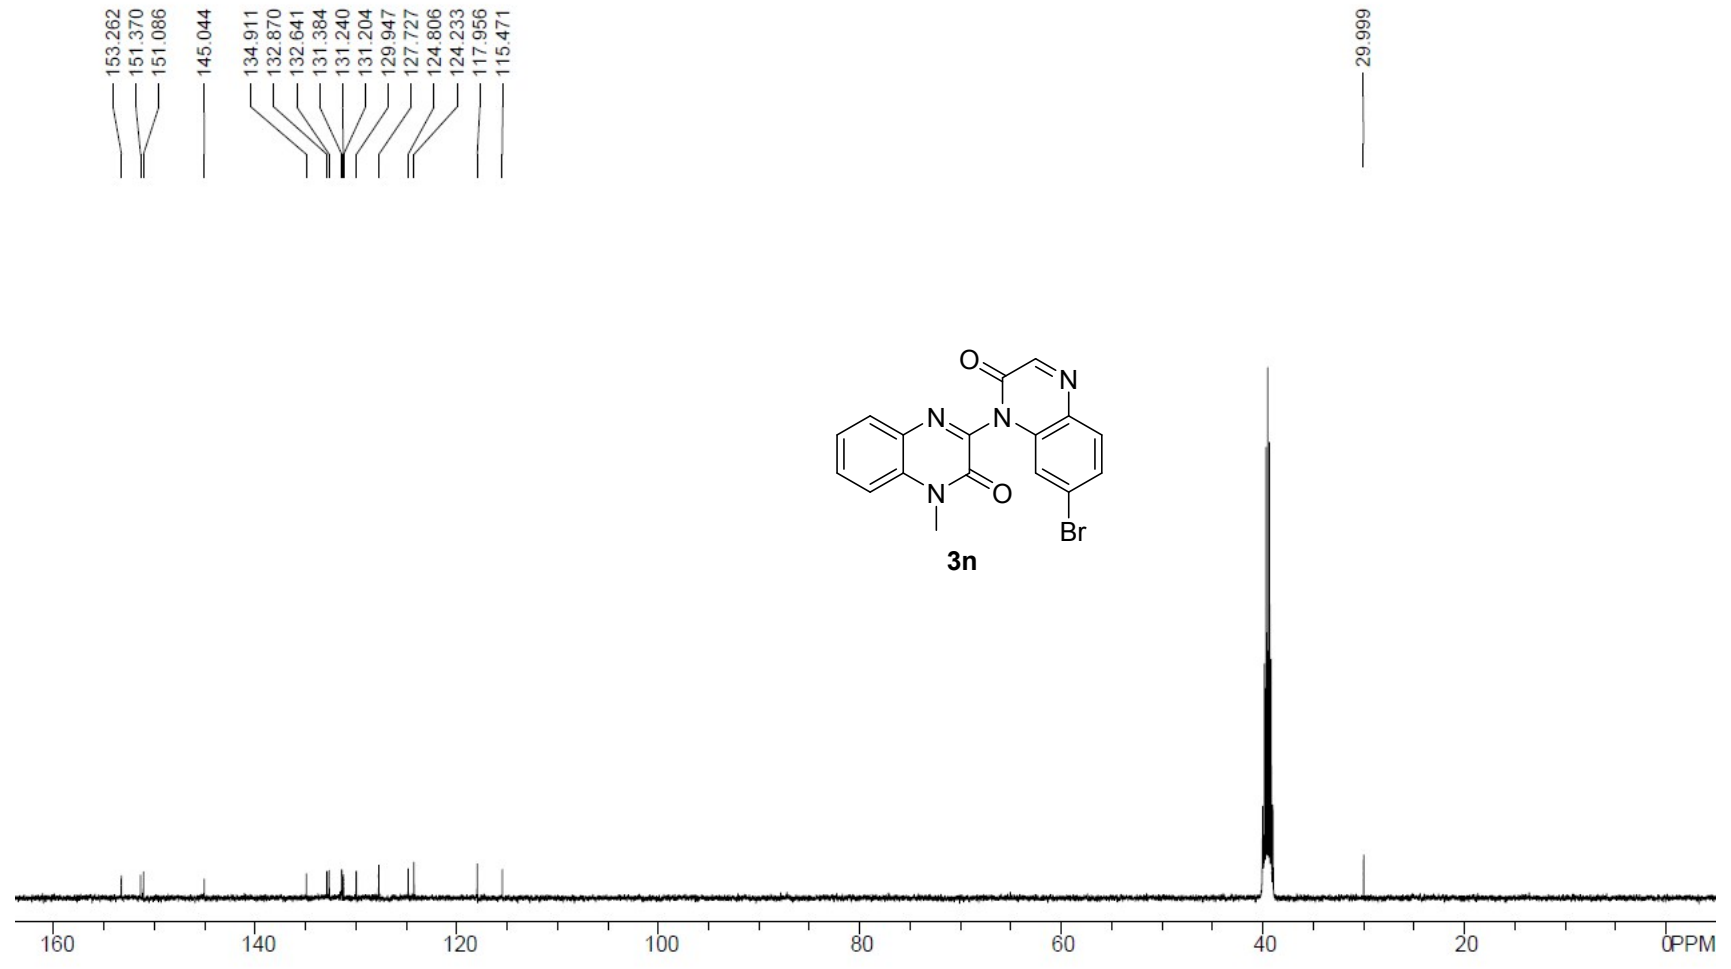

8.133  
8.109  
7.918  
7.915  
7.898  
7.895  
7.838  
7.820  
7.817  
7.802  
7.799  
7.746  
7.725  
7.527  
7.524  
7.507  
7.489  
7.486  
7.473  
7.469  
7.451  
7.433  
7.430  
7.322  
7.320  
7.302  
7.285  
7.283  
7.076  
7.055  
6.712  
6.688

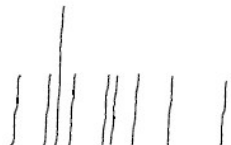

3.734

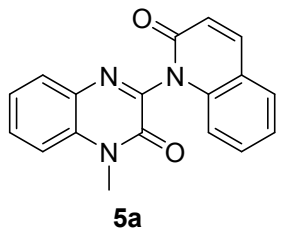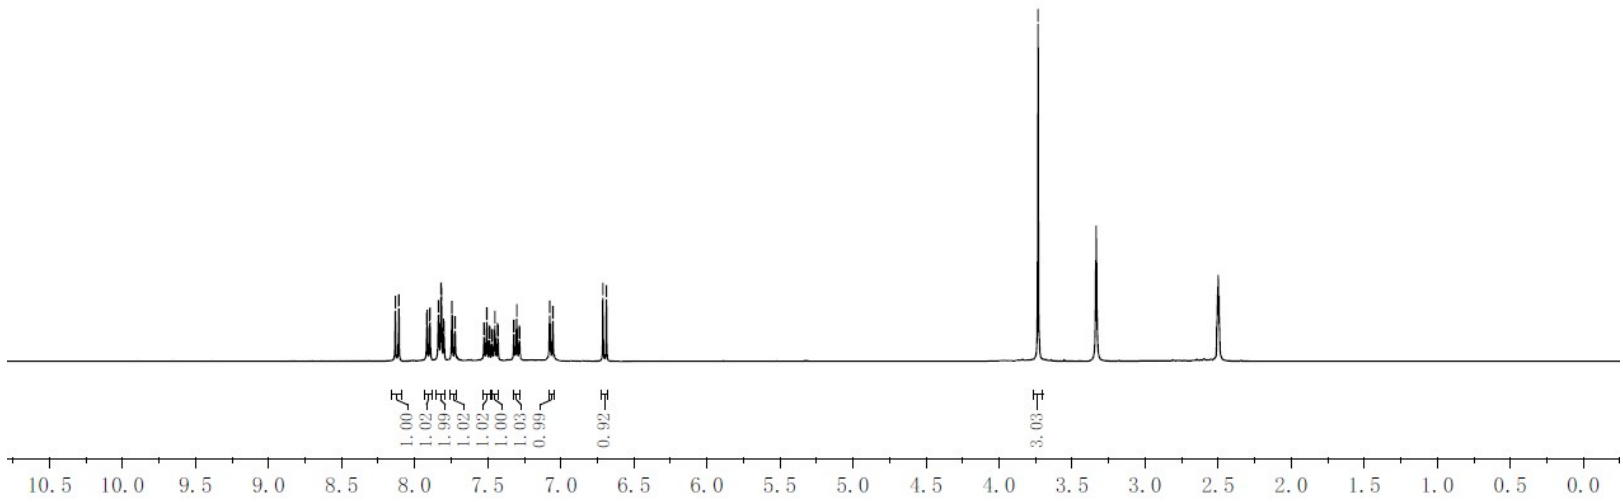

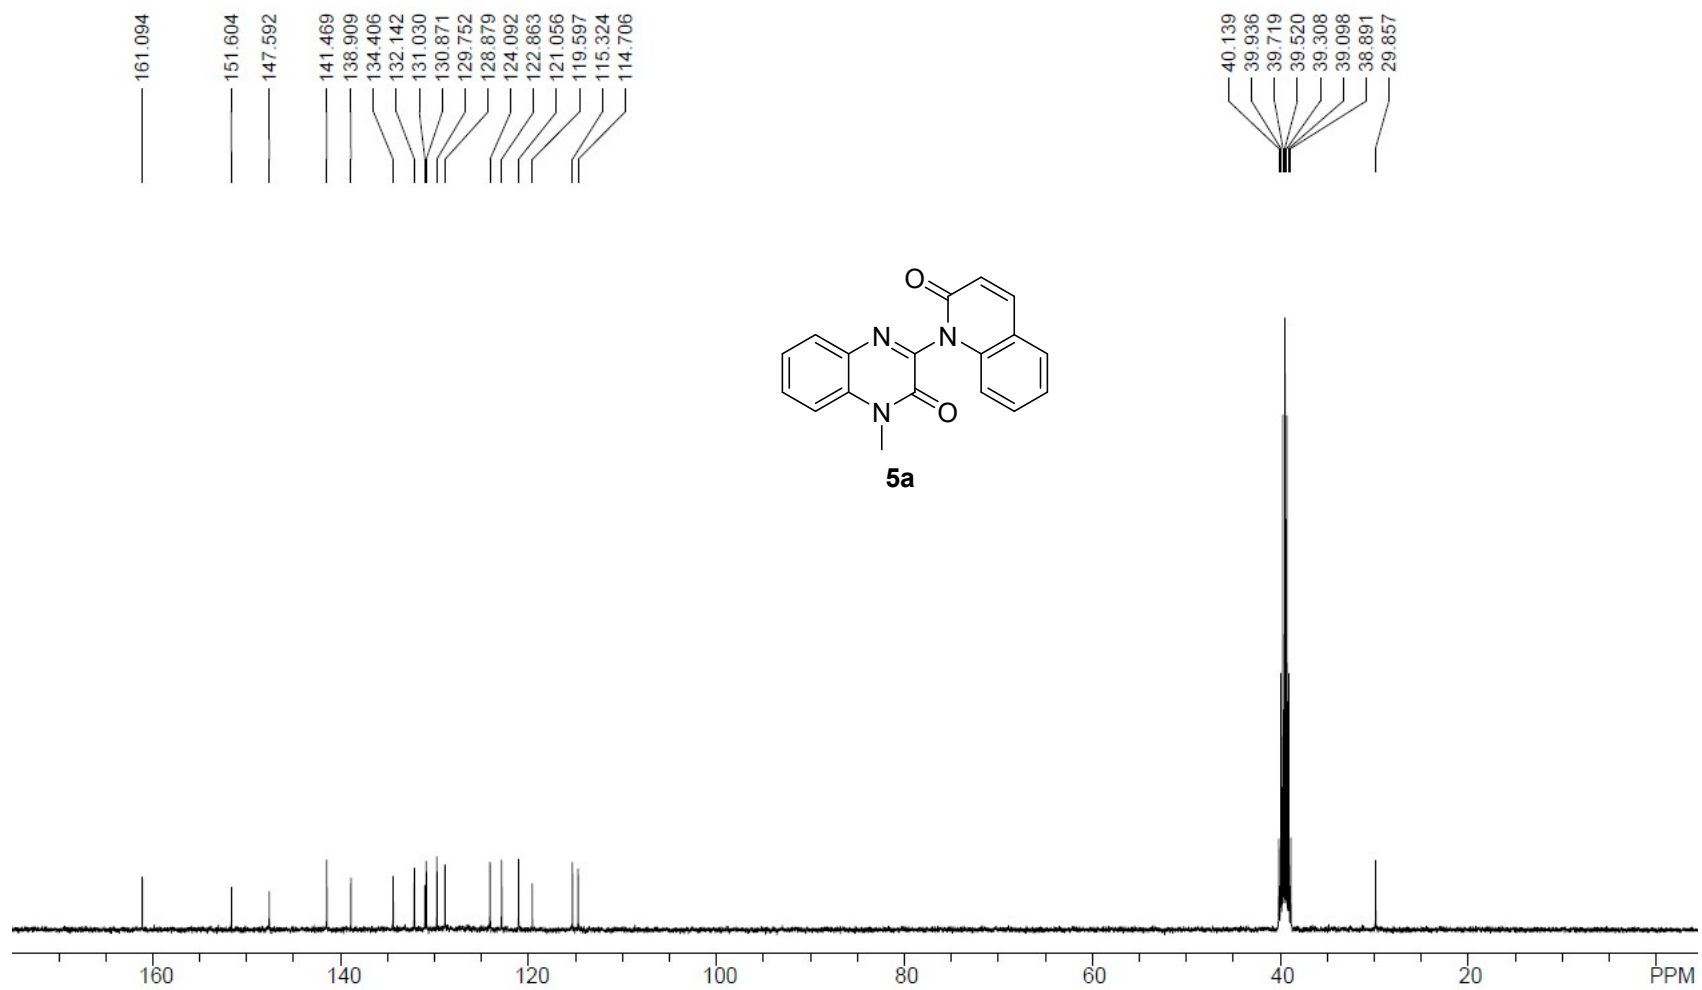

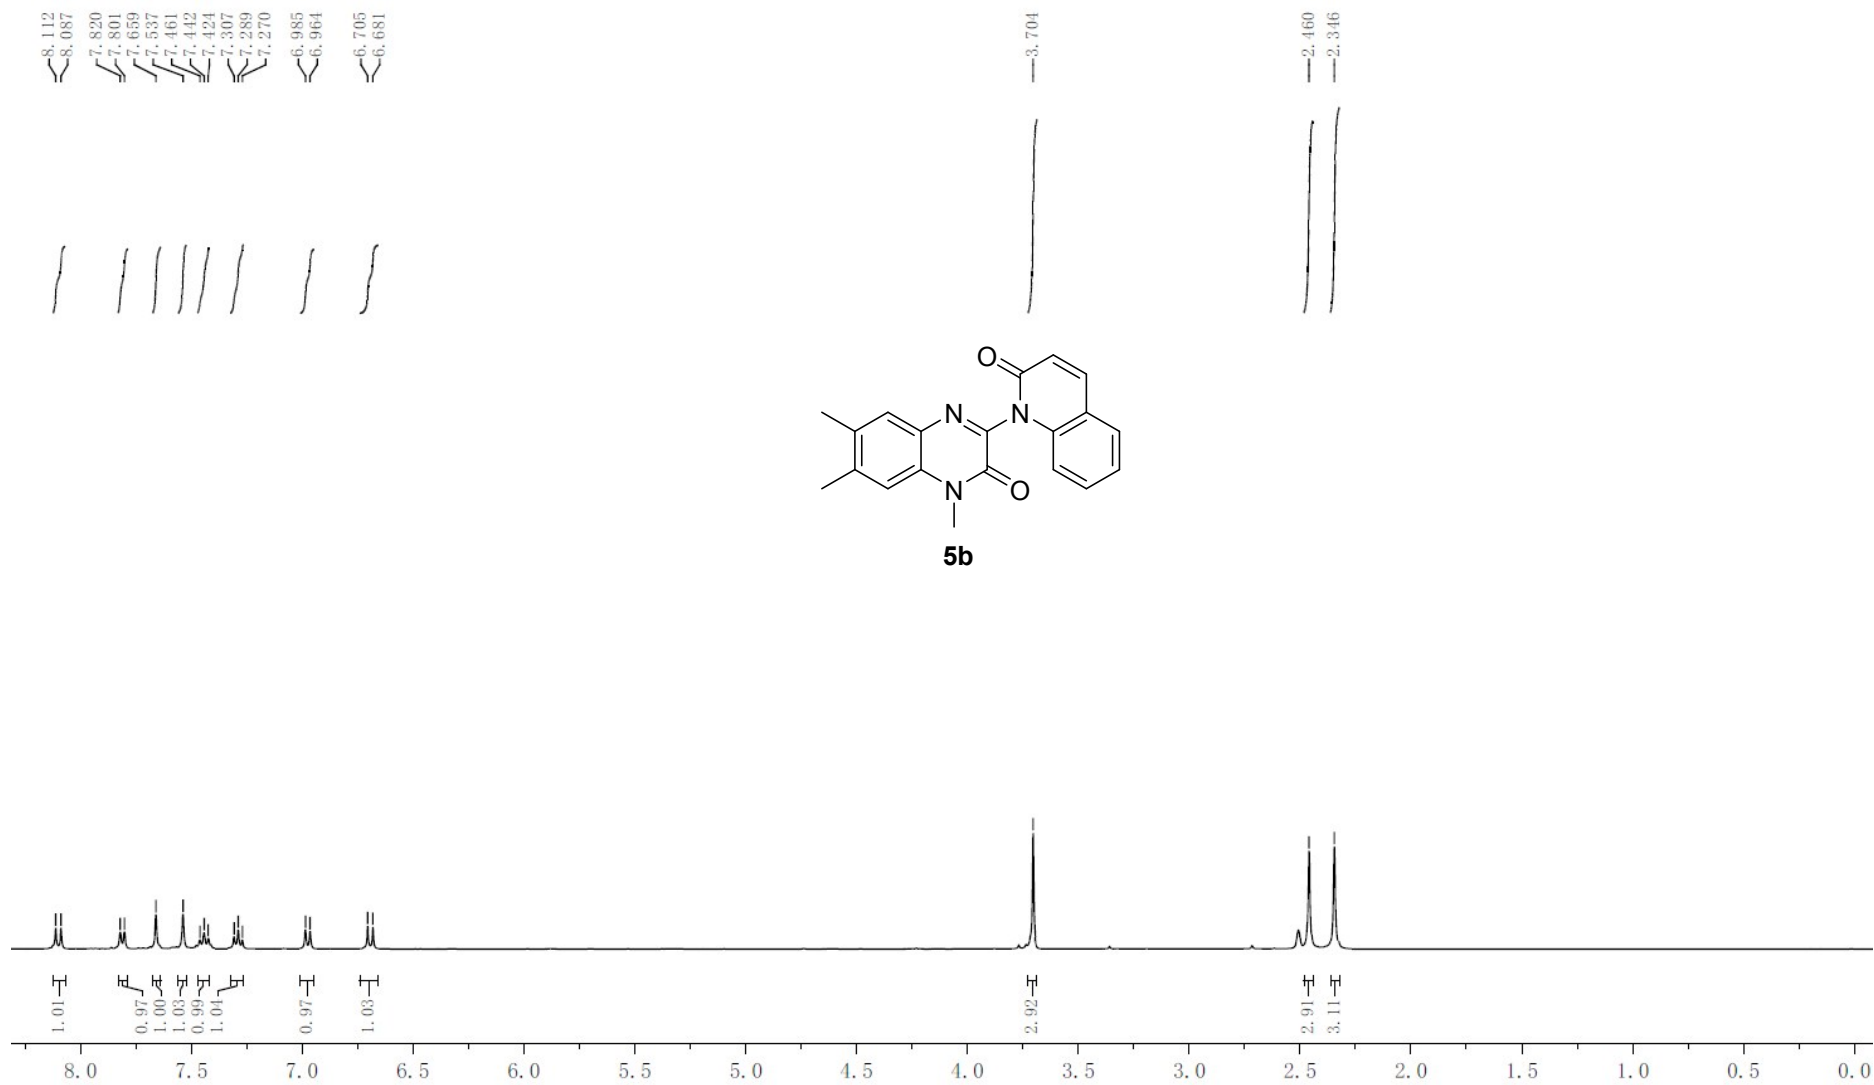

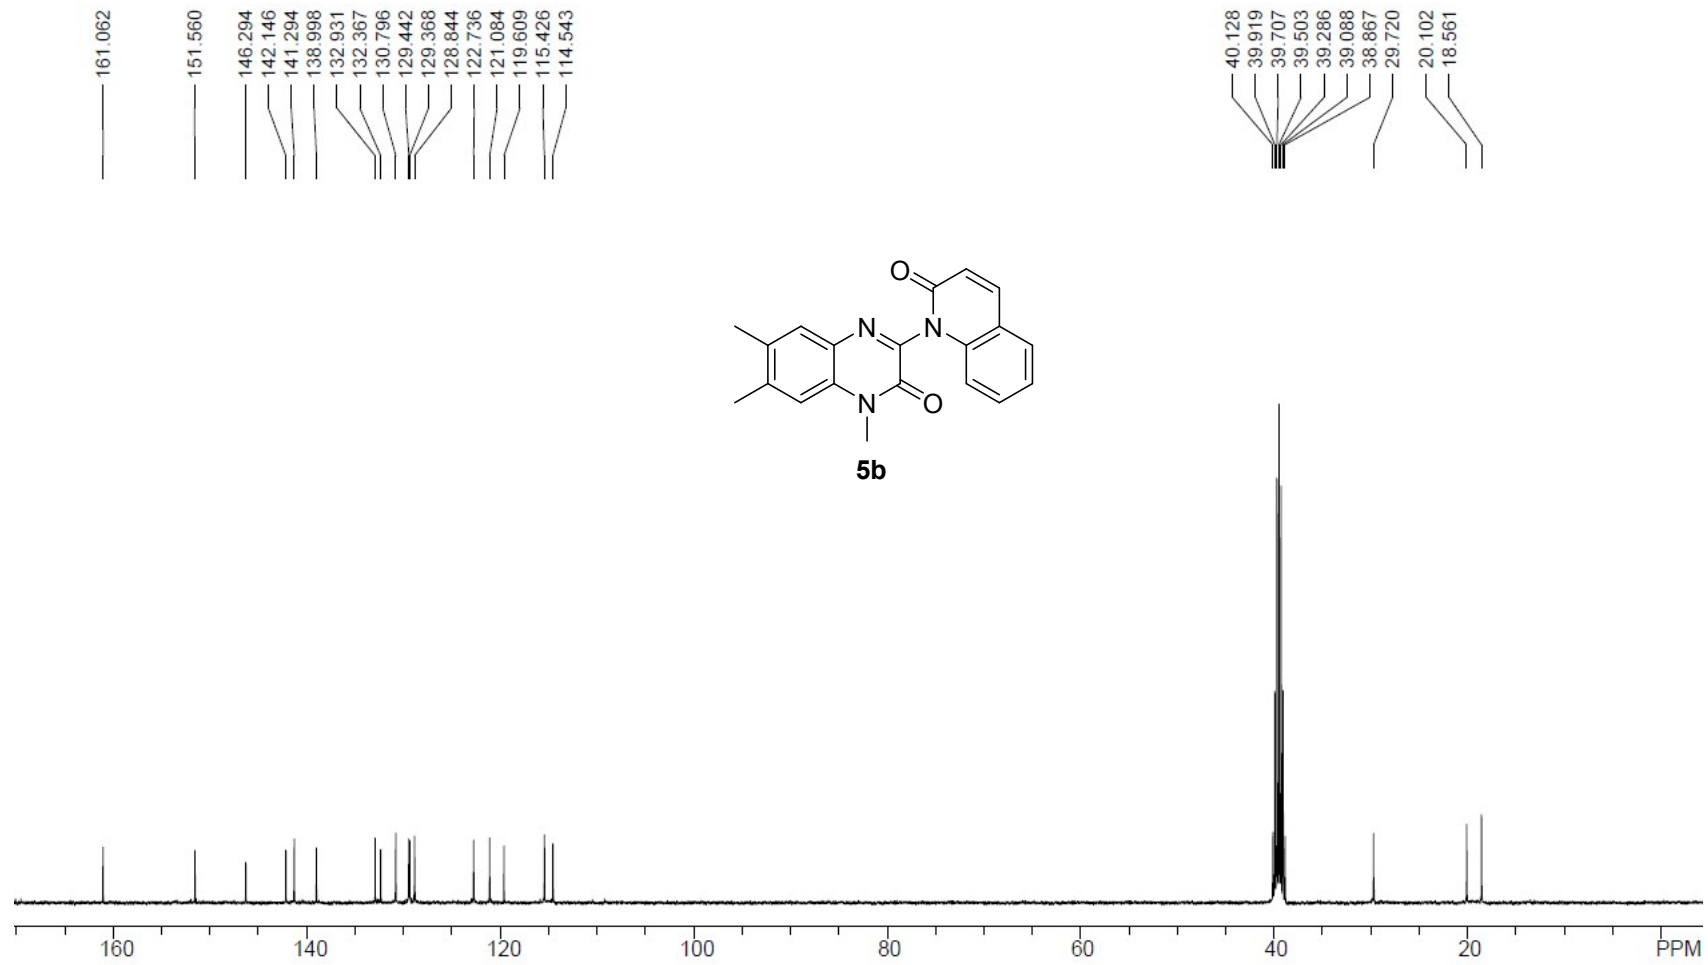

8.220  
8.133  
8.109  
8.061  
7.832  
7.813  
7.475  
7.473  
7.455  
7.436  
7.433  
7.325  
7.306  
7.288  
7.150  
7.129  
6.704  
6.680

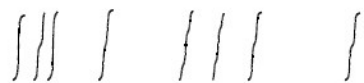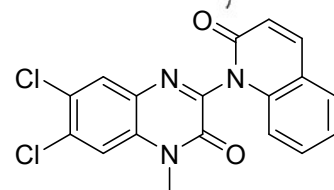

**5c**

3.704

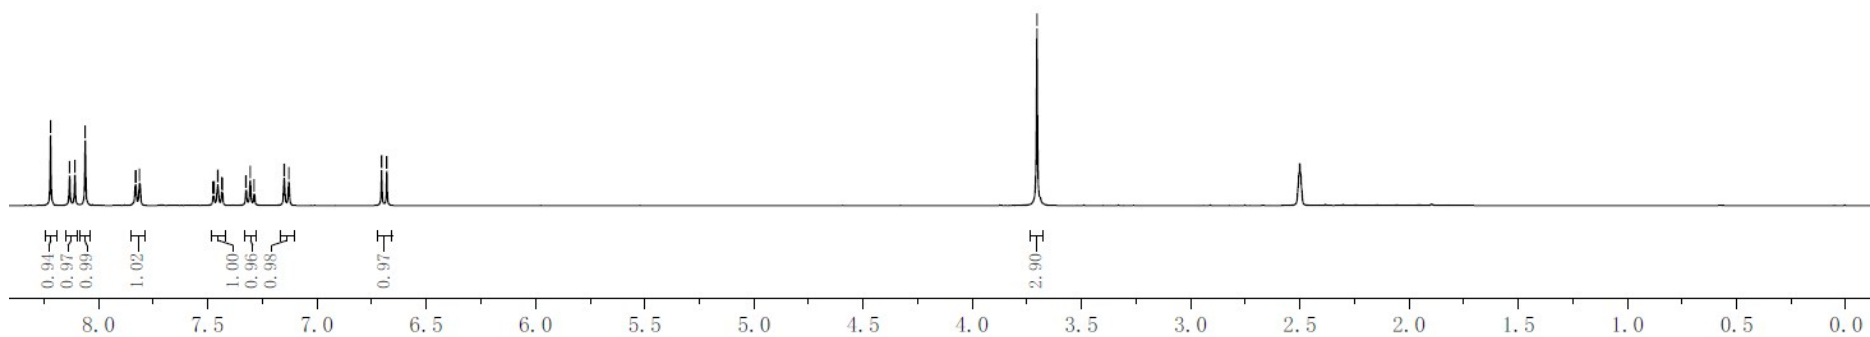

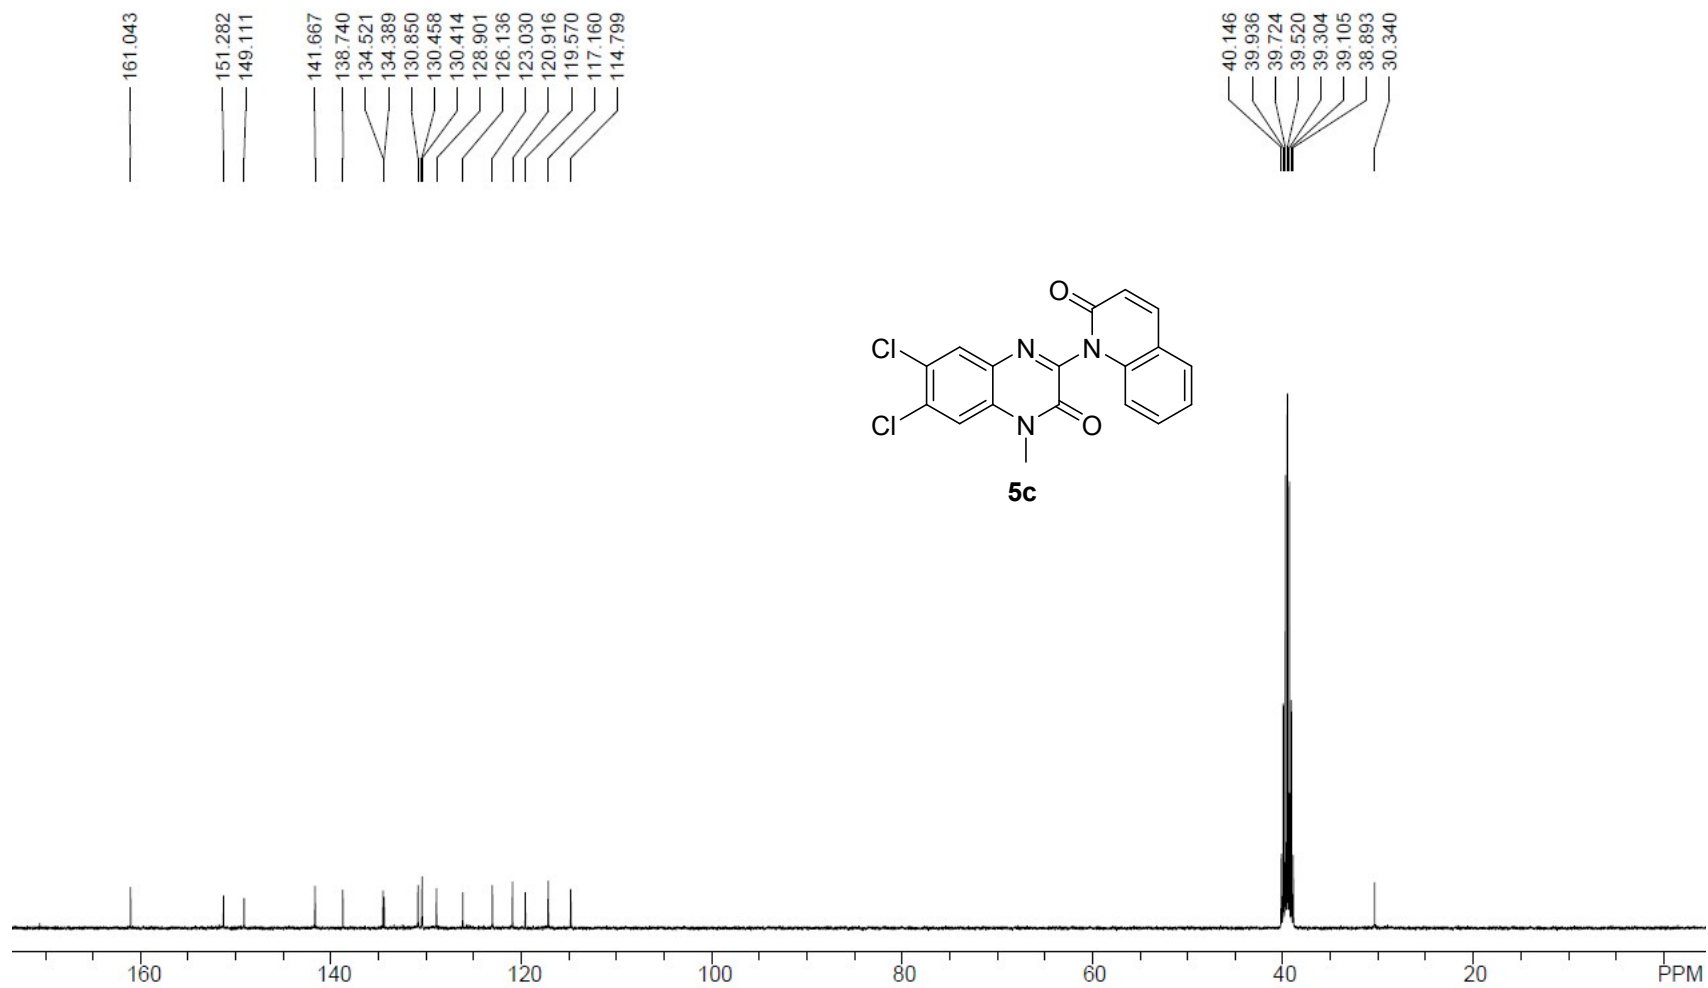

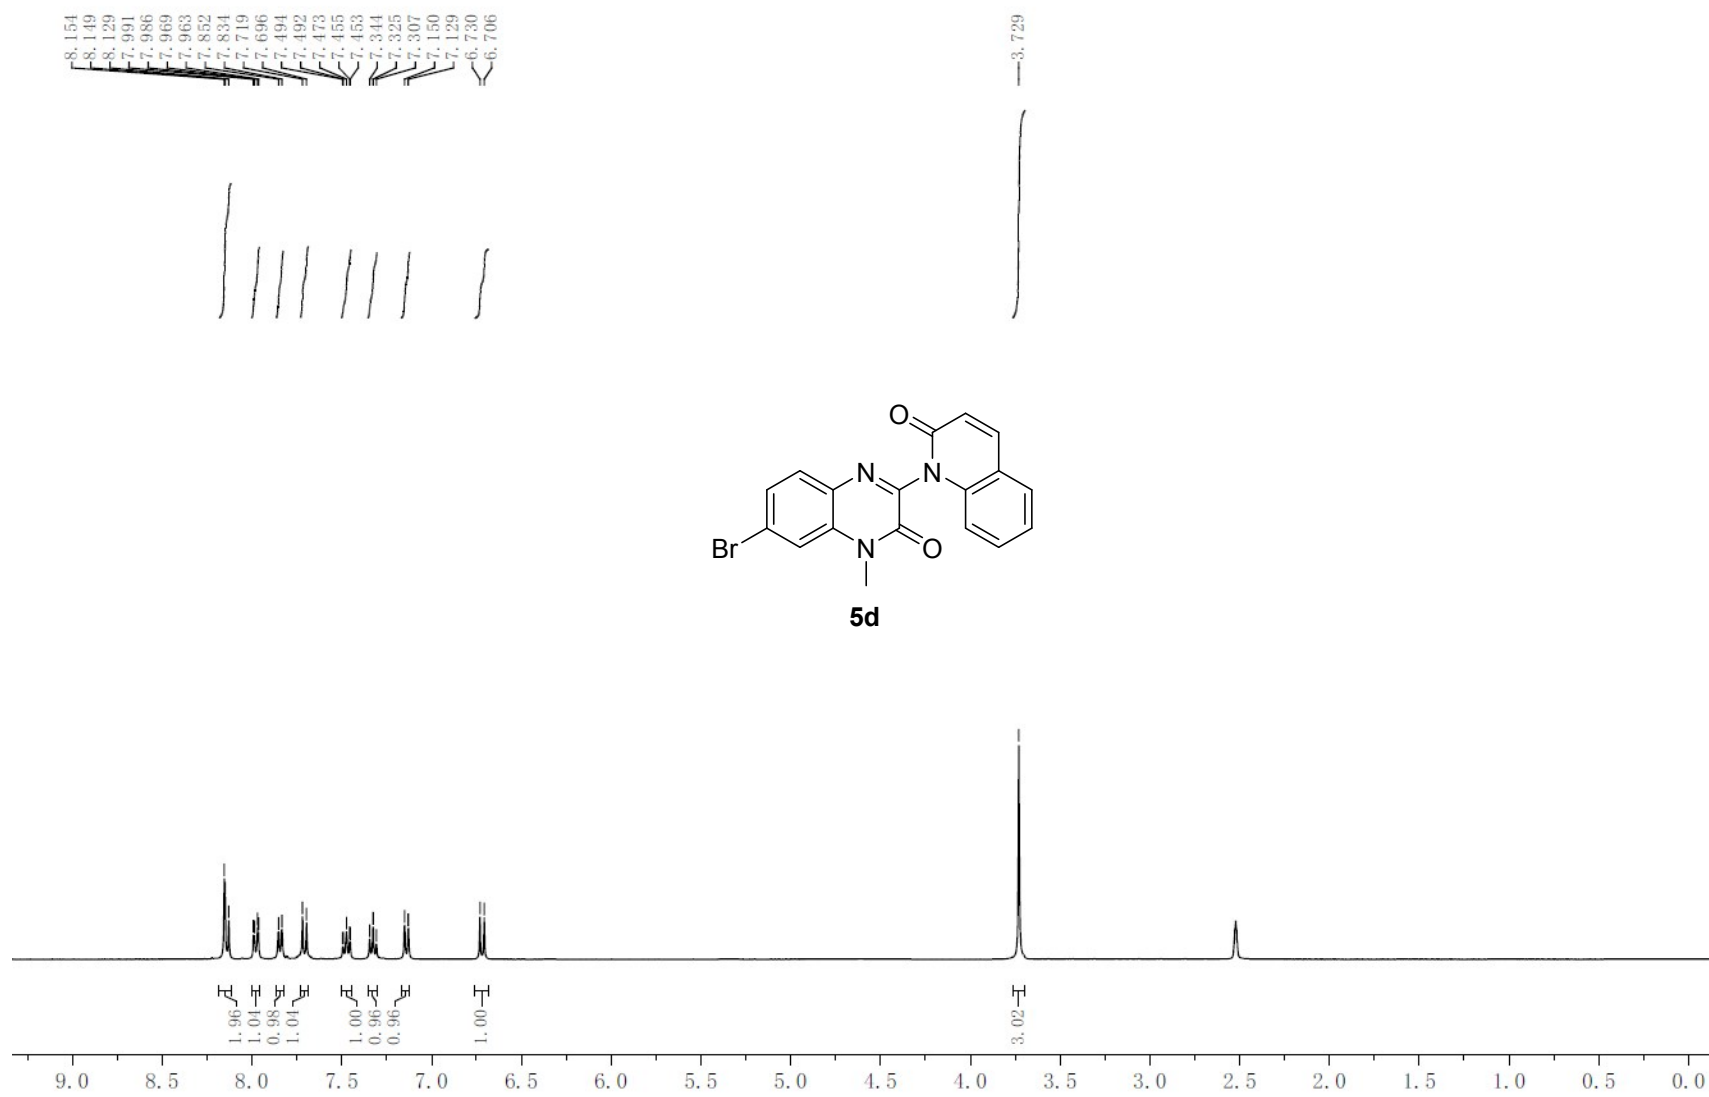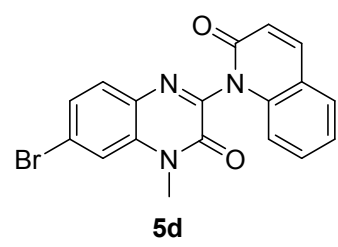



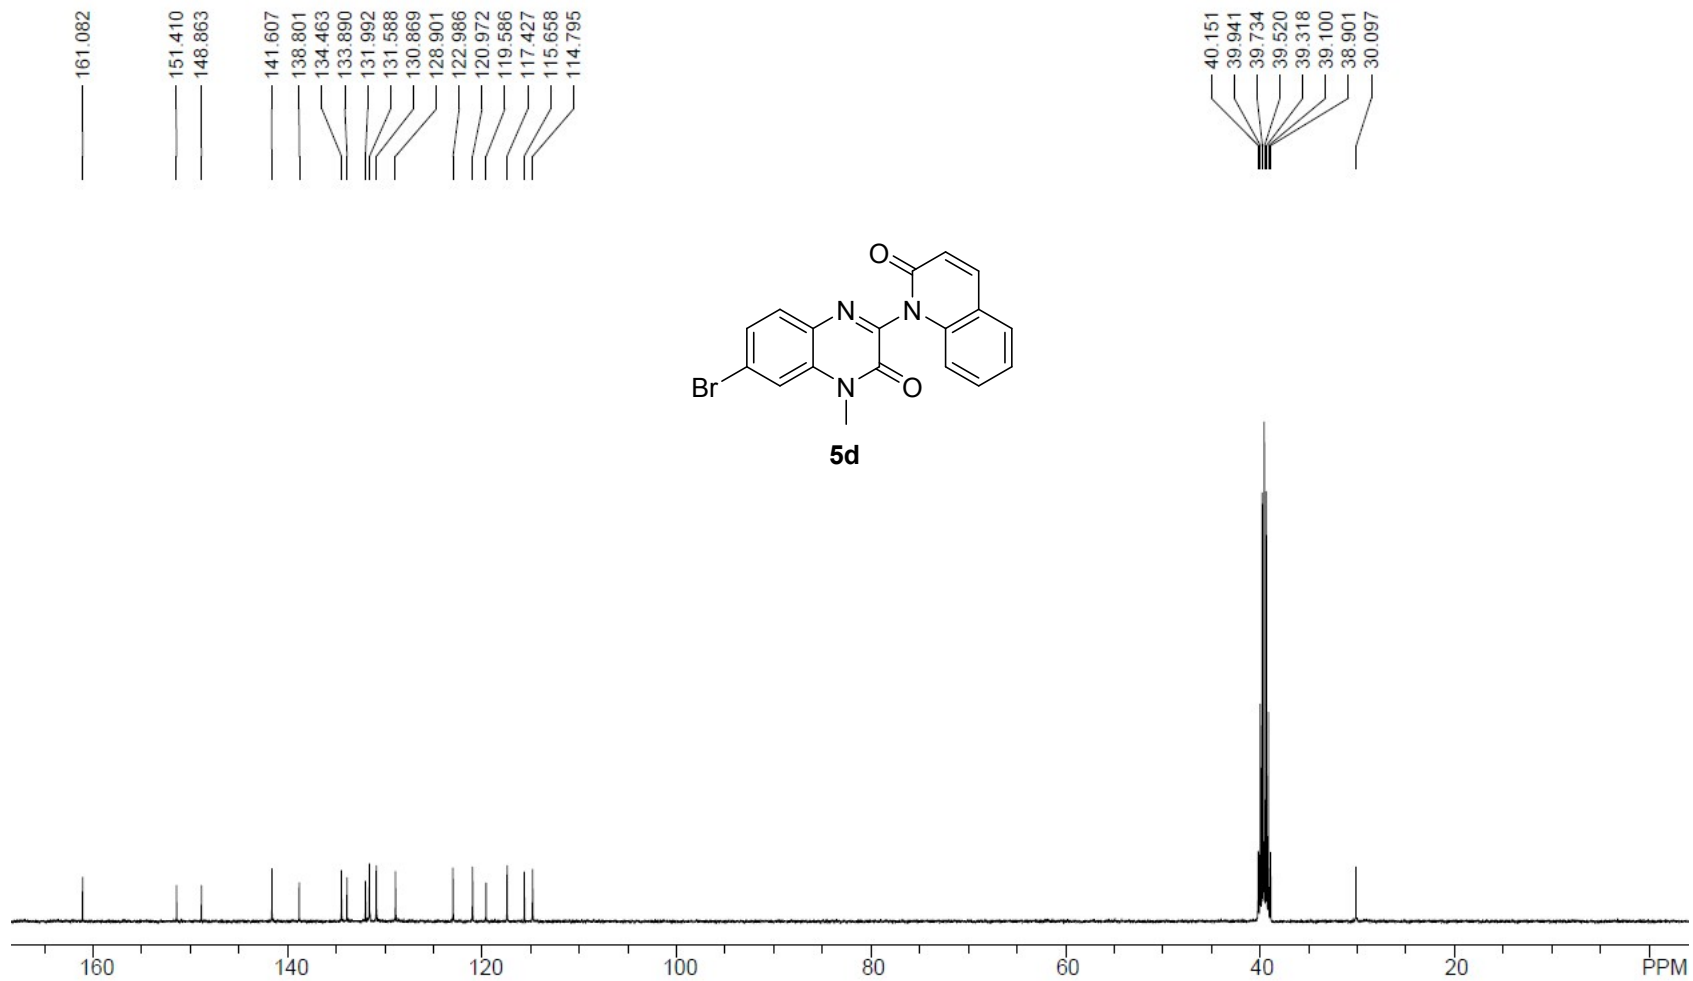

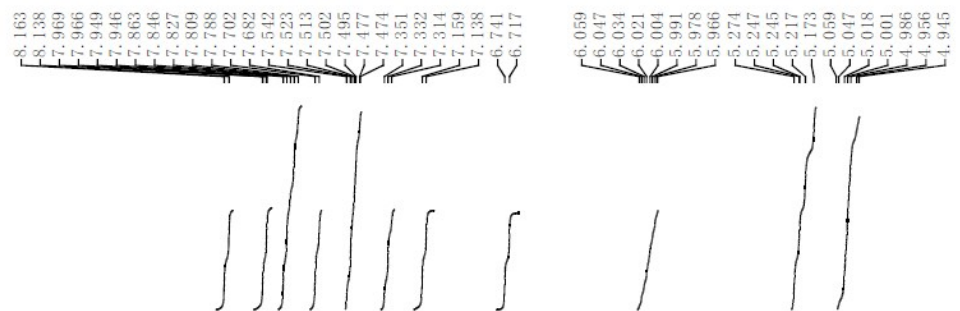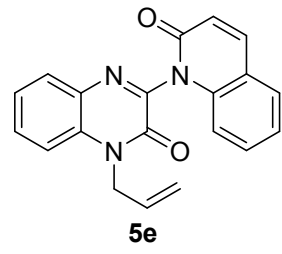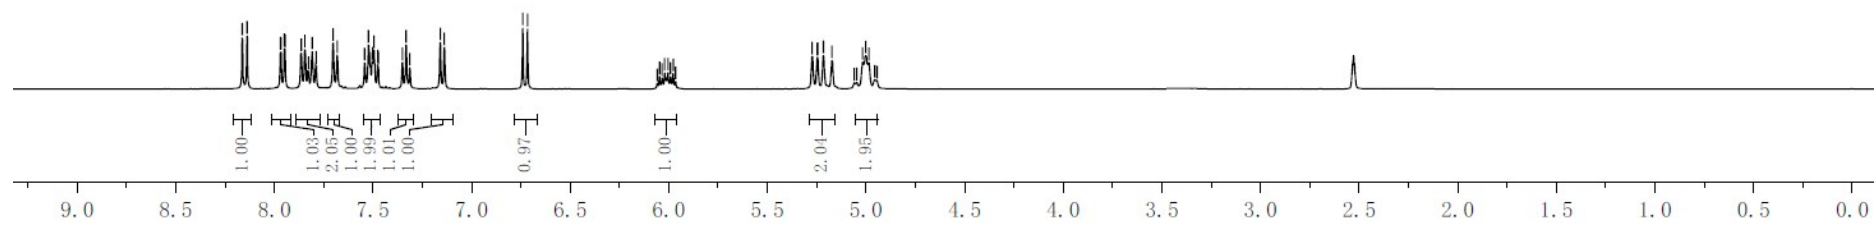

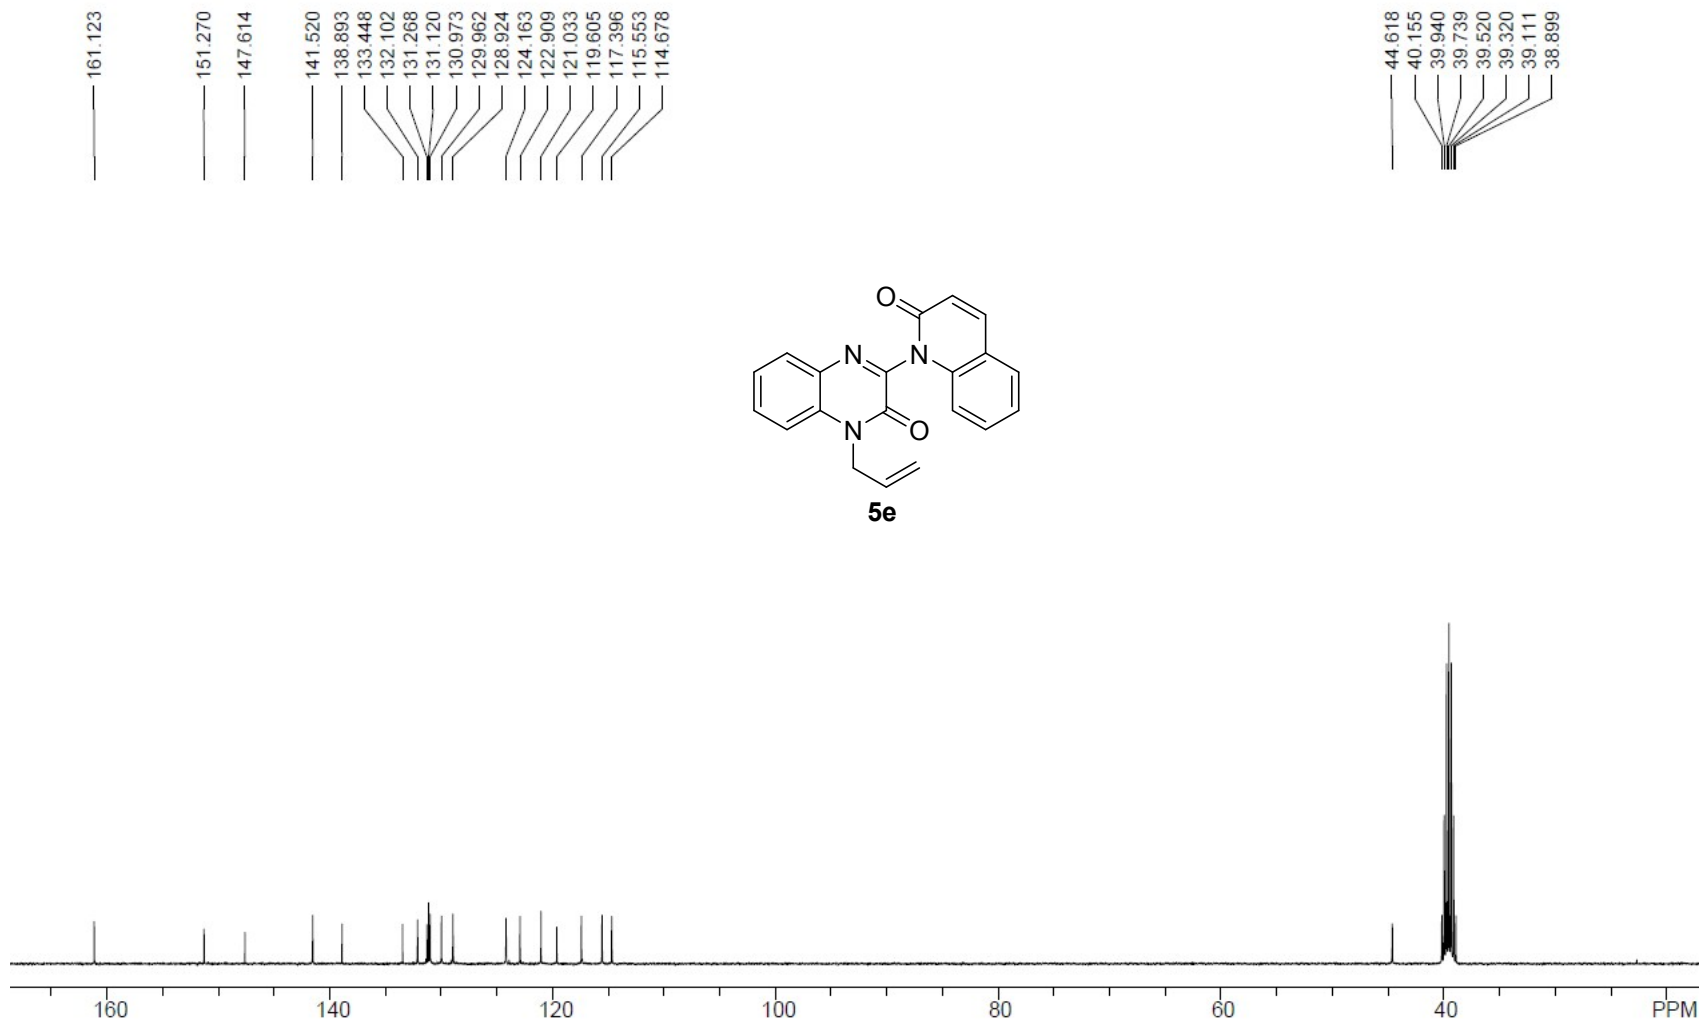

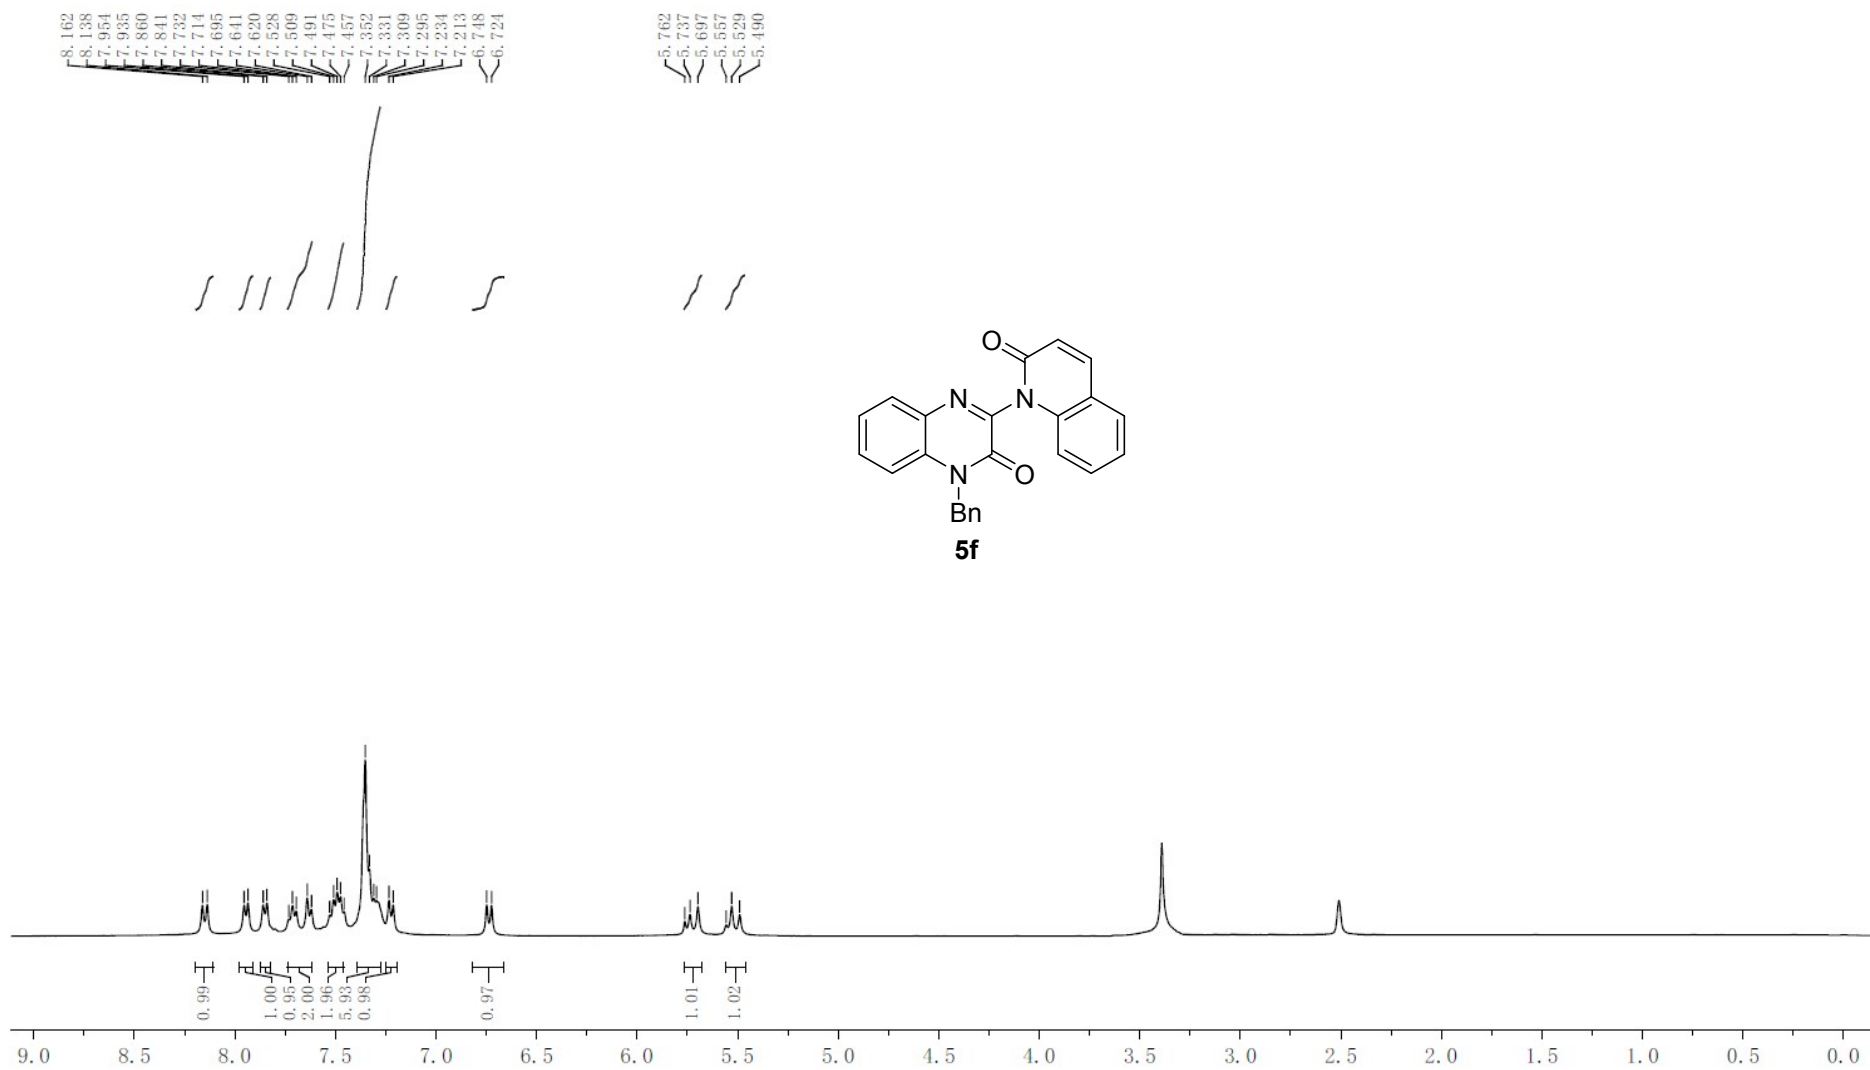

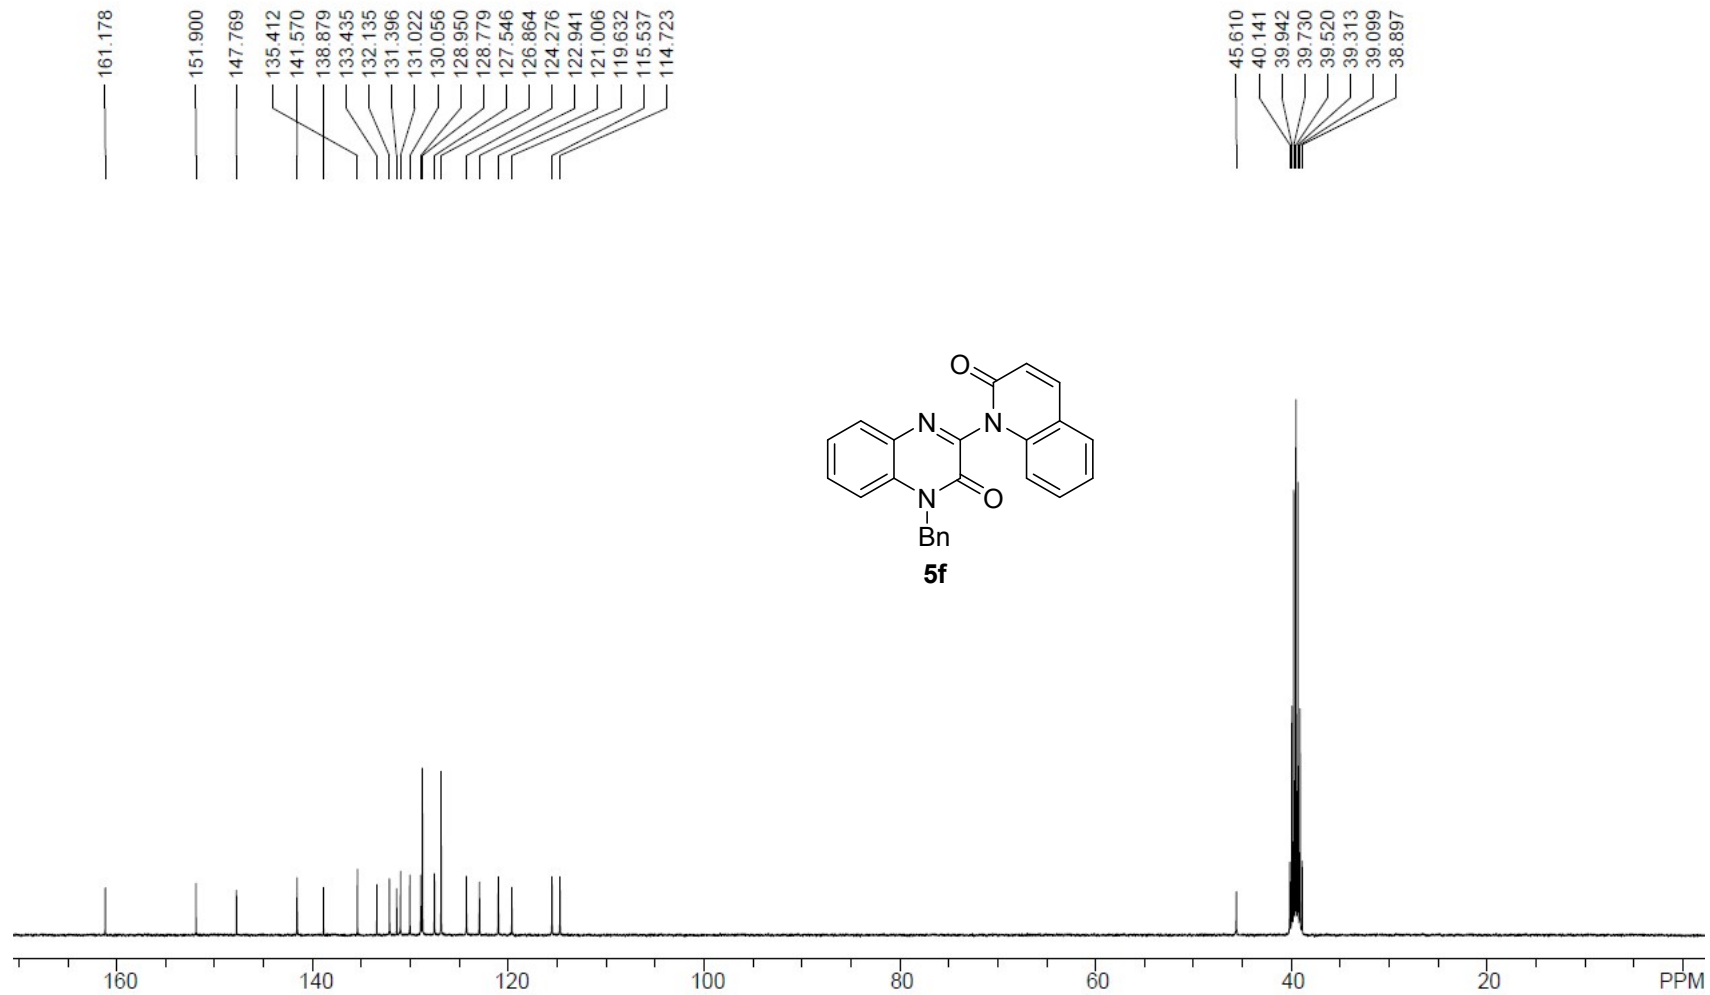

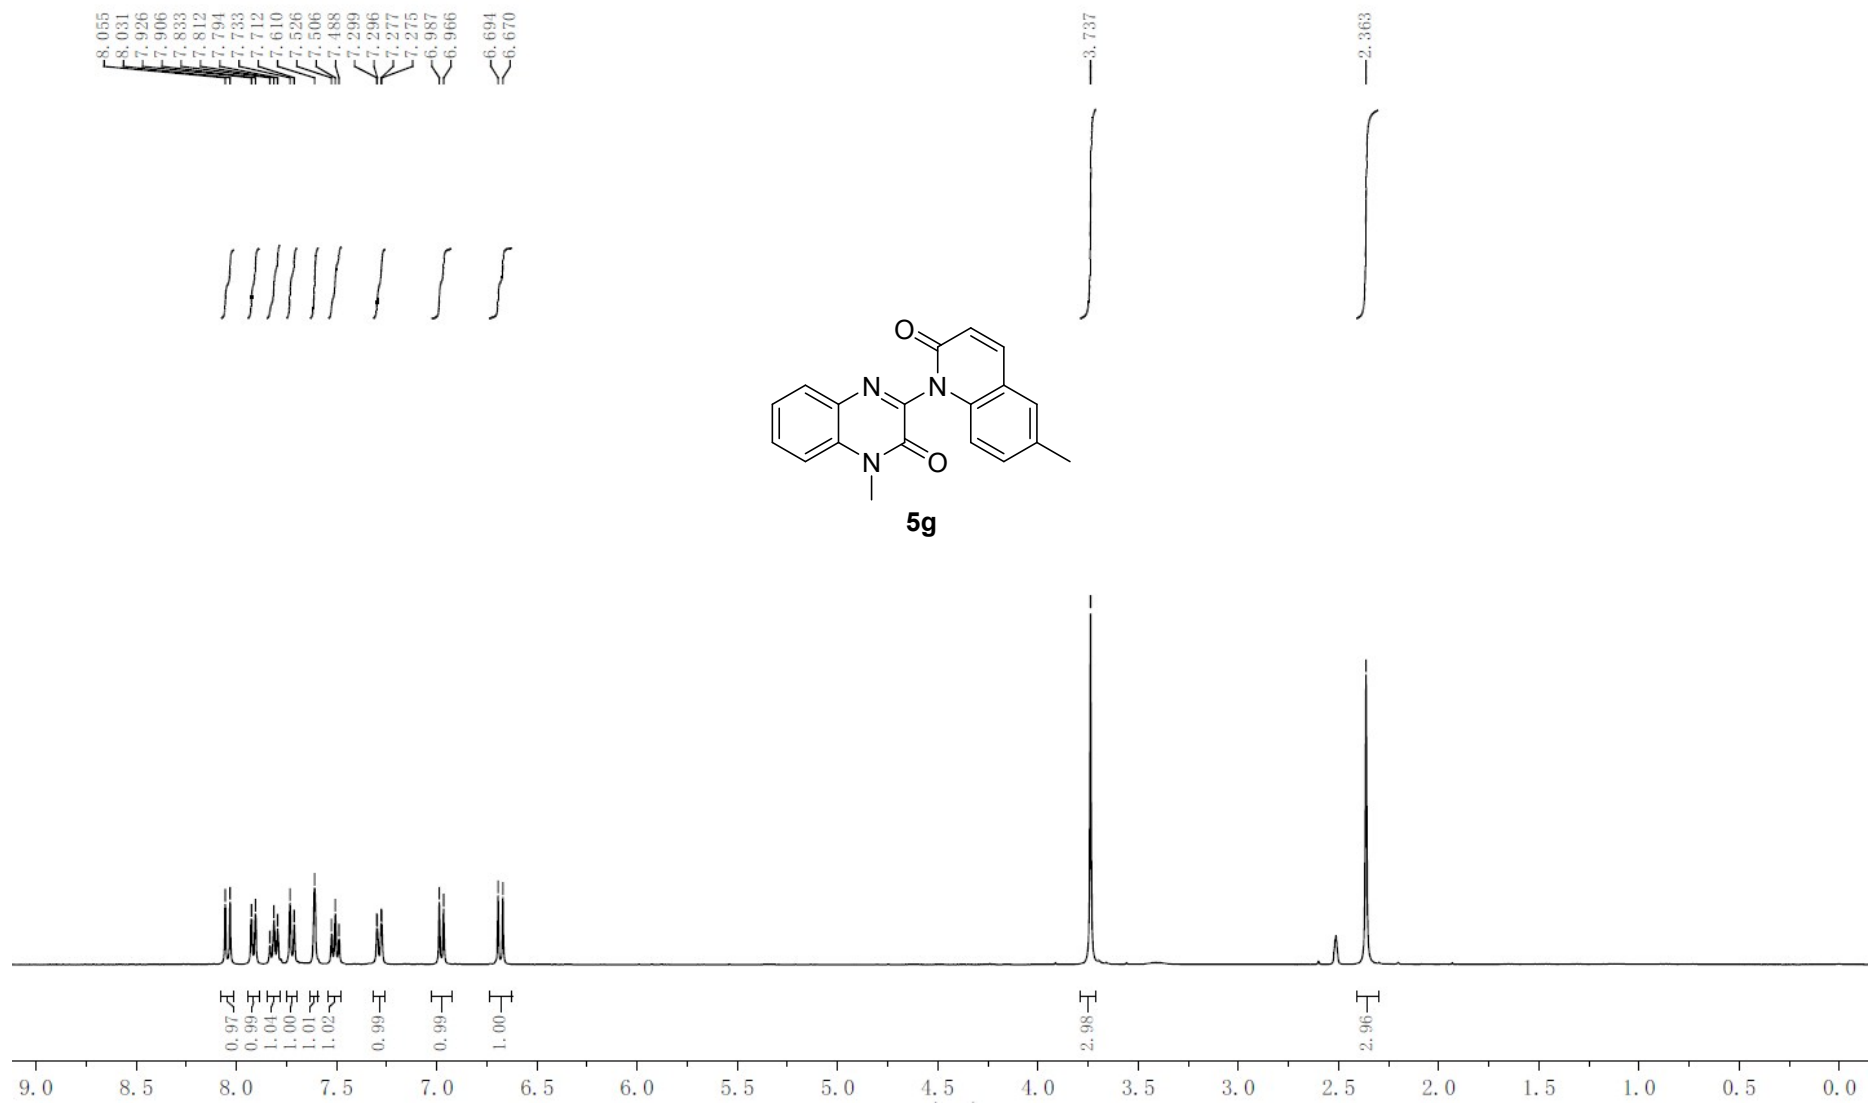

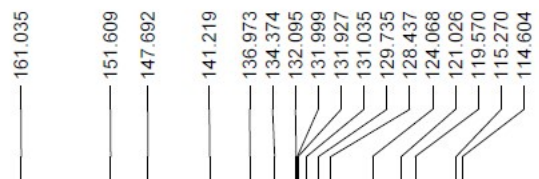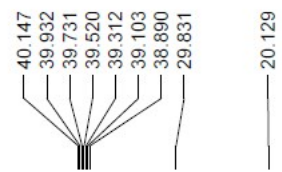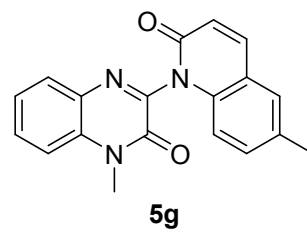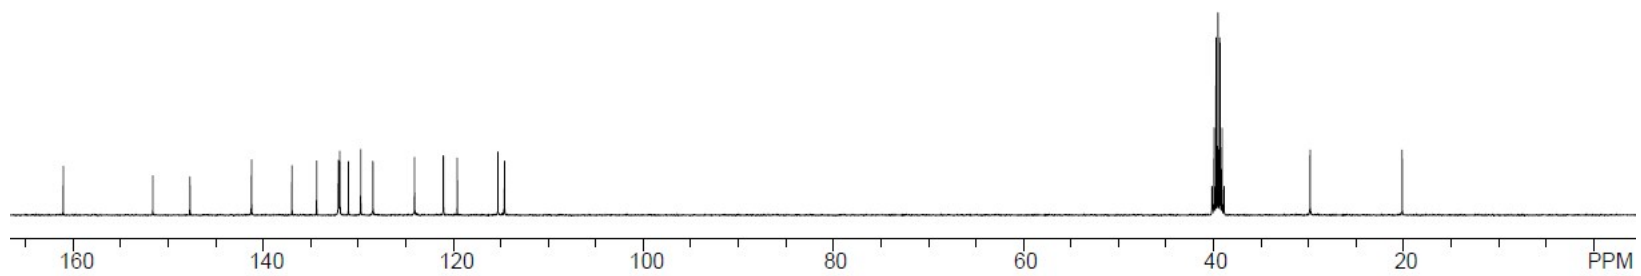

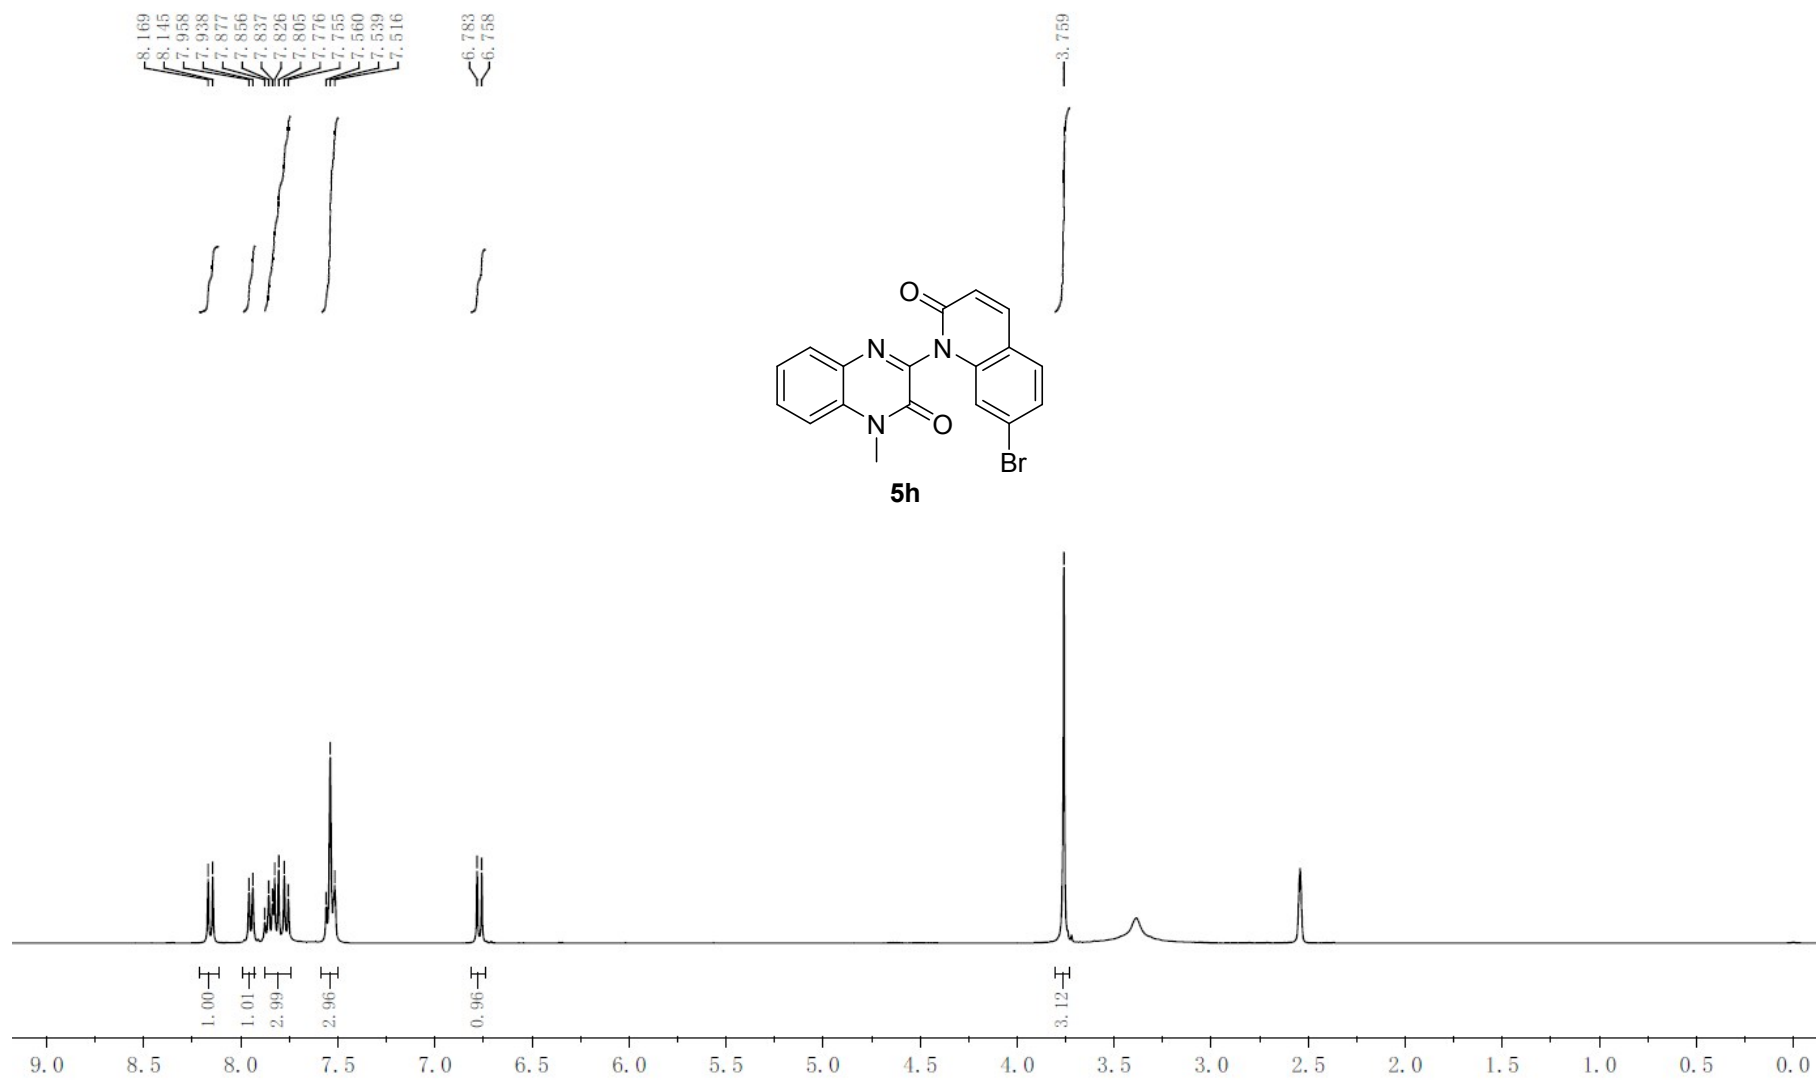



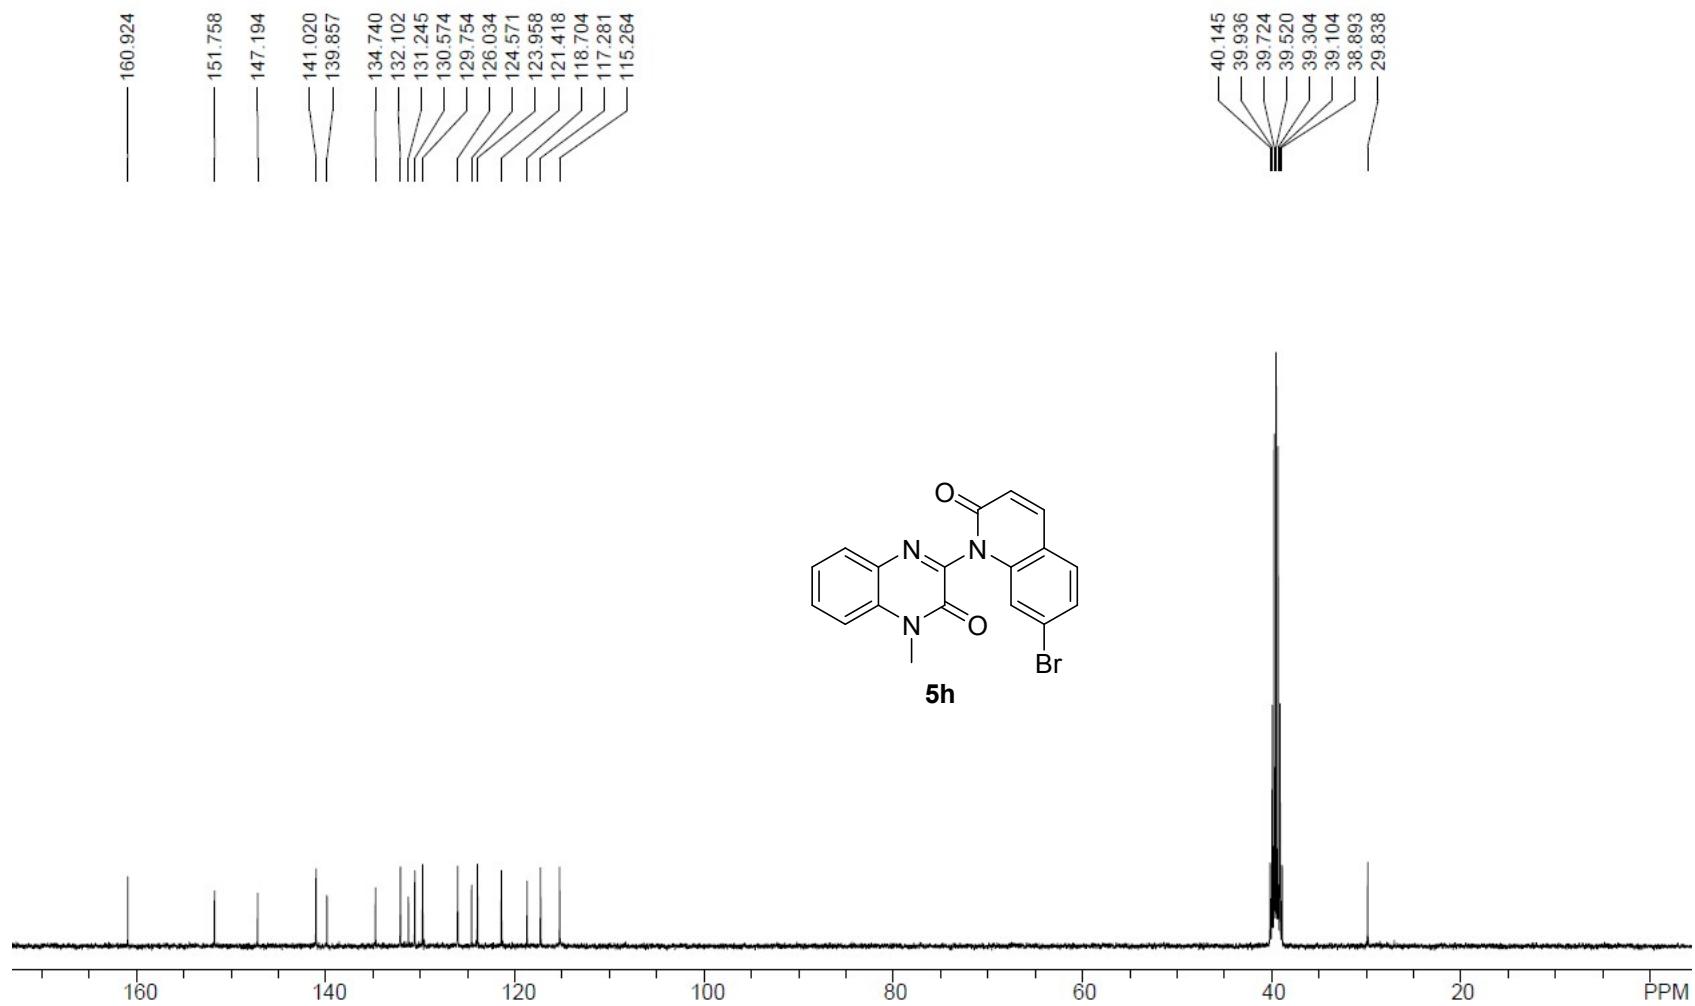

8.111  
8.087  
7.921  
7.902  
7.833  
7.814  
7.795  
7.736  
7.714  
7.522  
7.503  
7.485  
7.368  
7.361  
7.345  
7.339  
7.324  
7.317  
7.201  
7.190  
7.178  
7.167  
6.795  
6.771

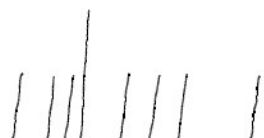

3.734

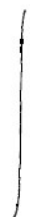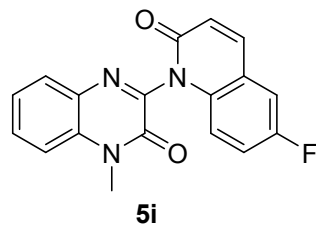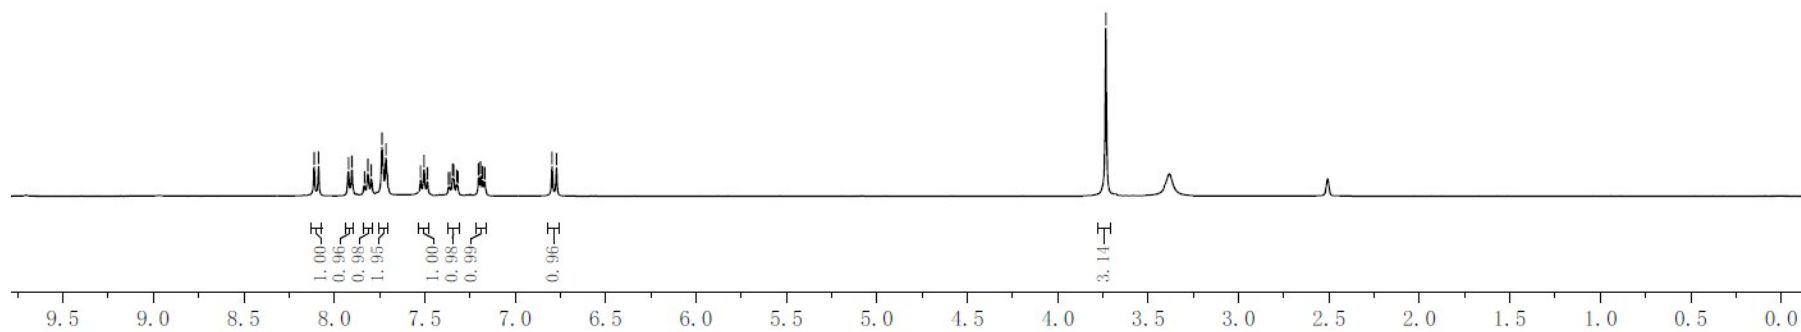

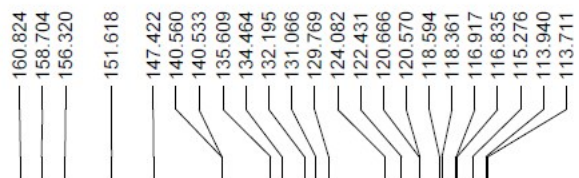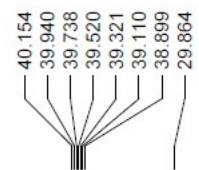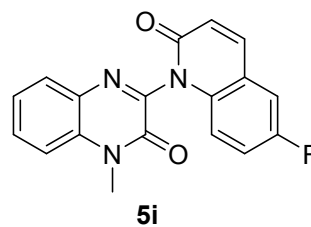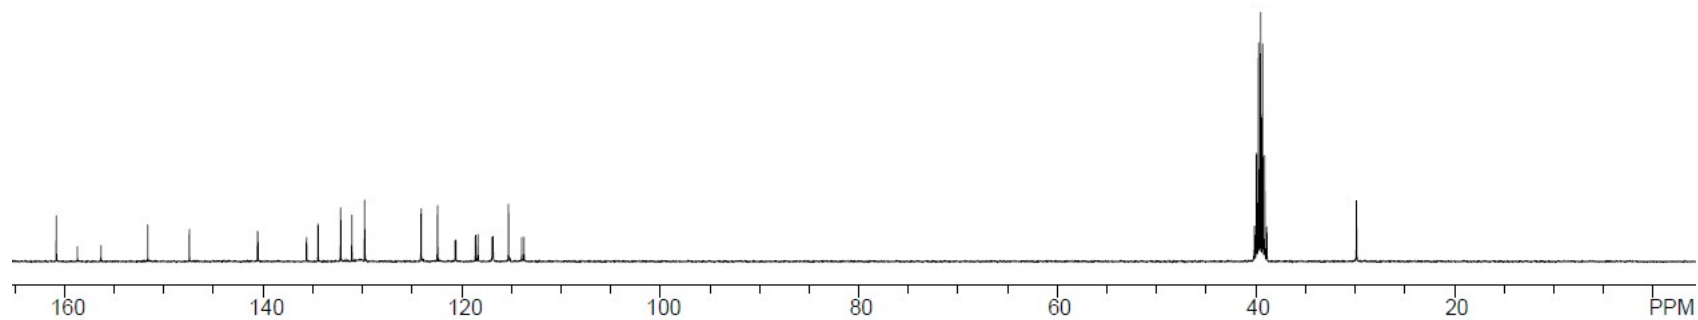

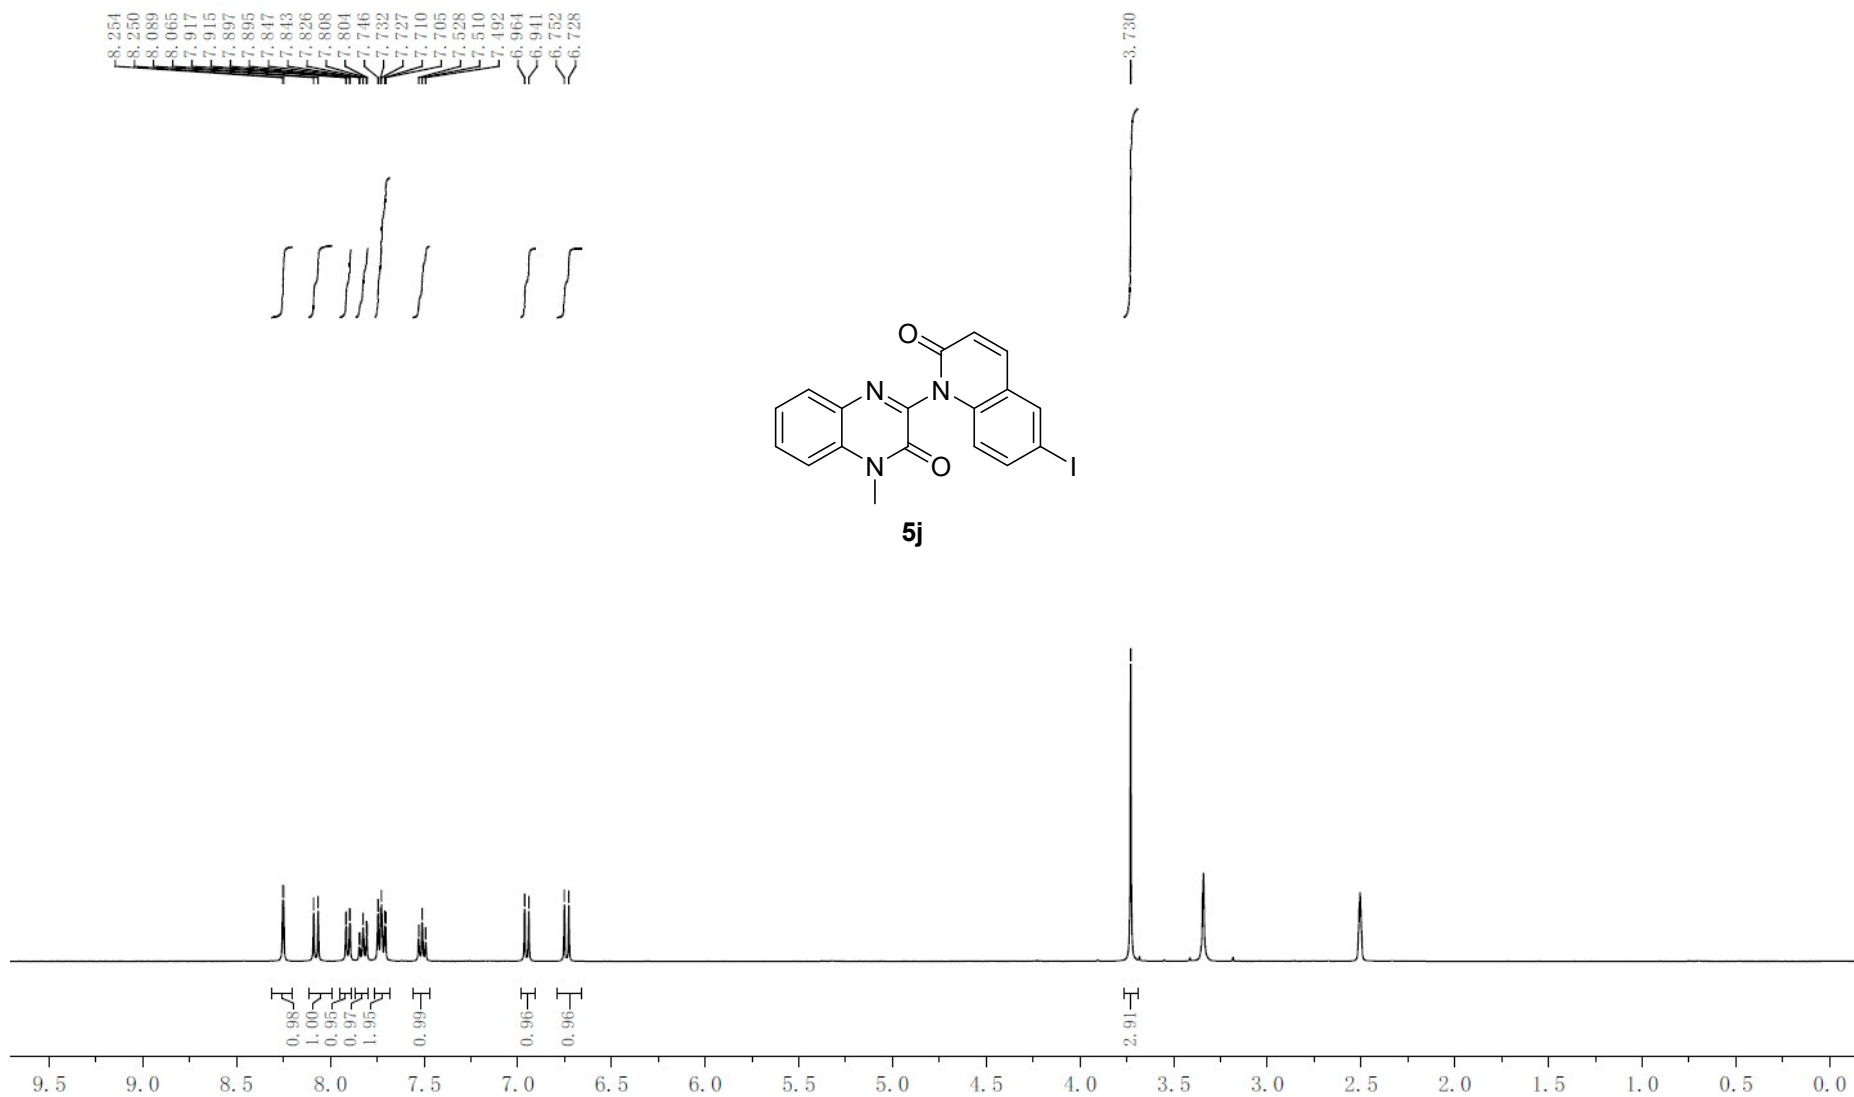

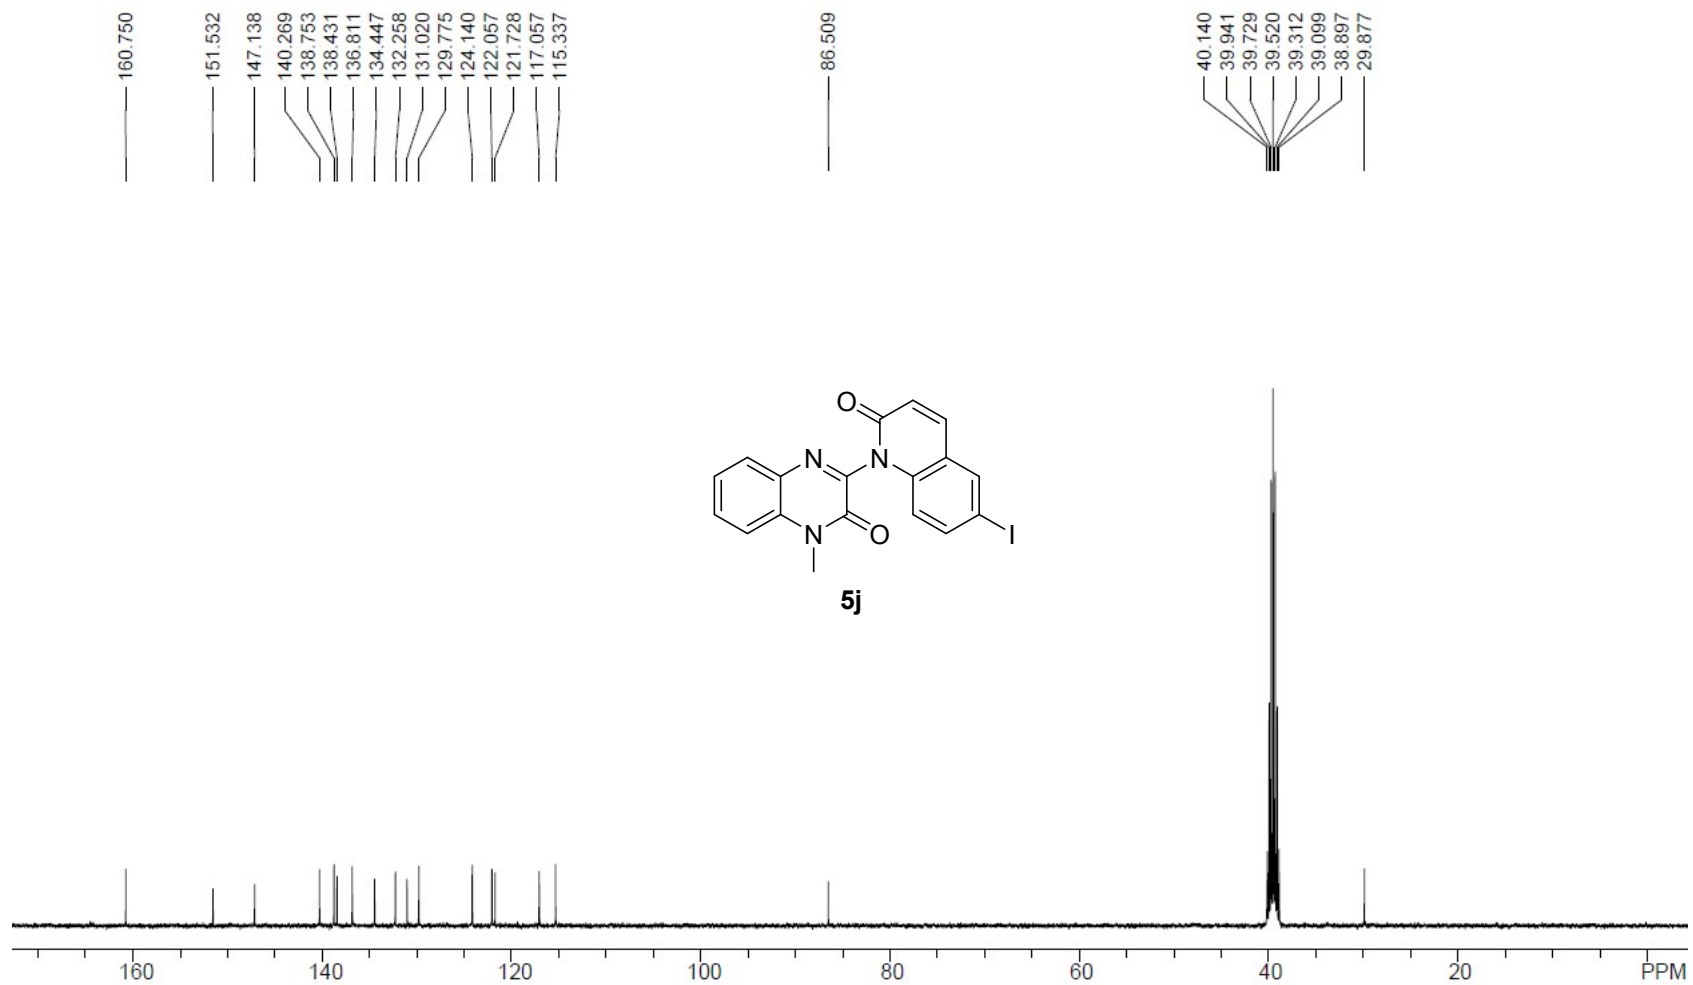

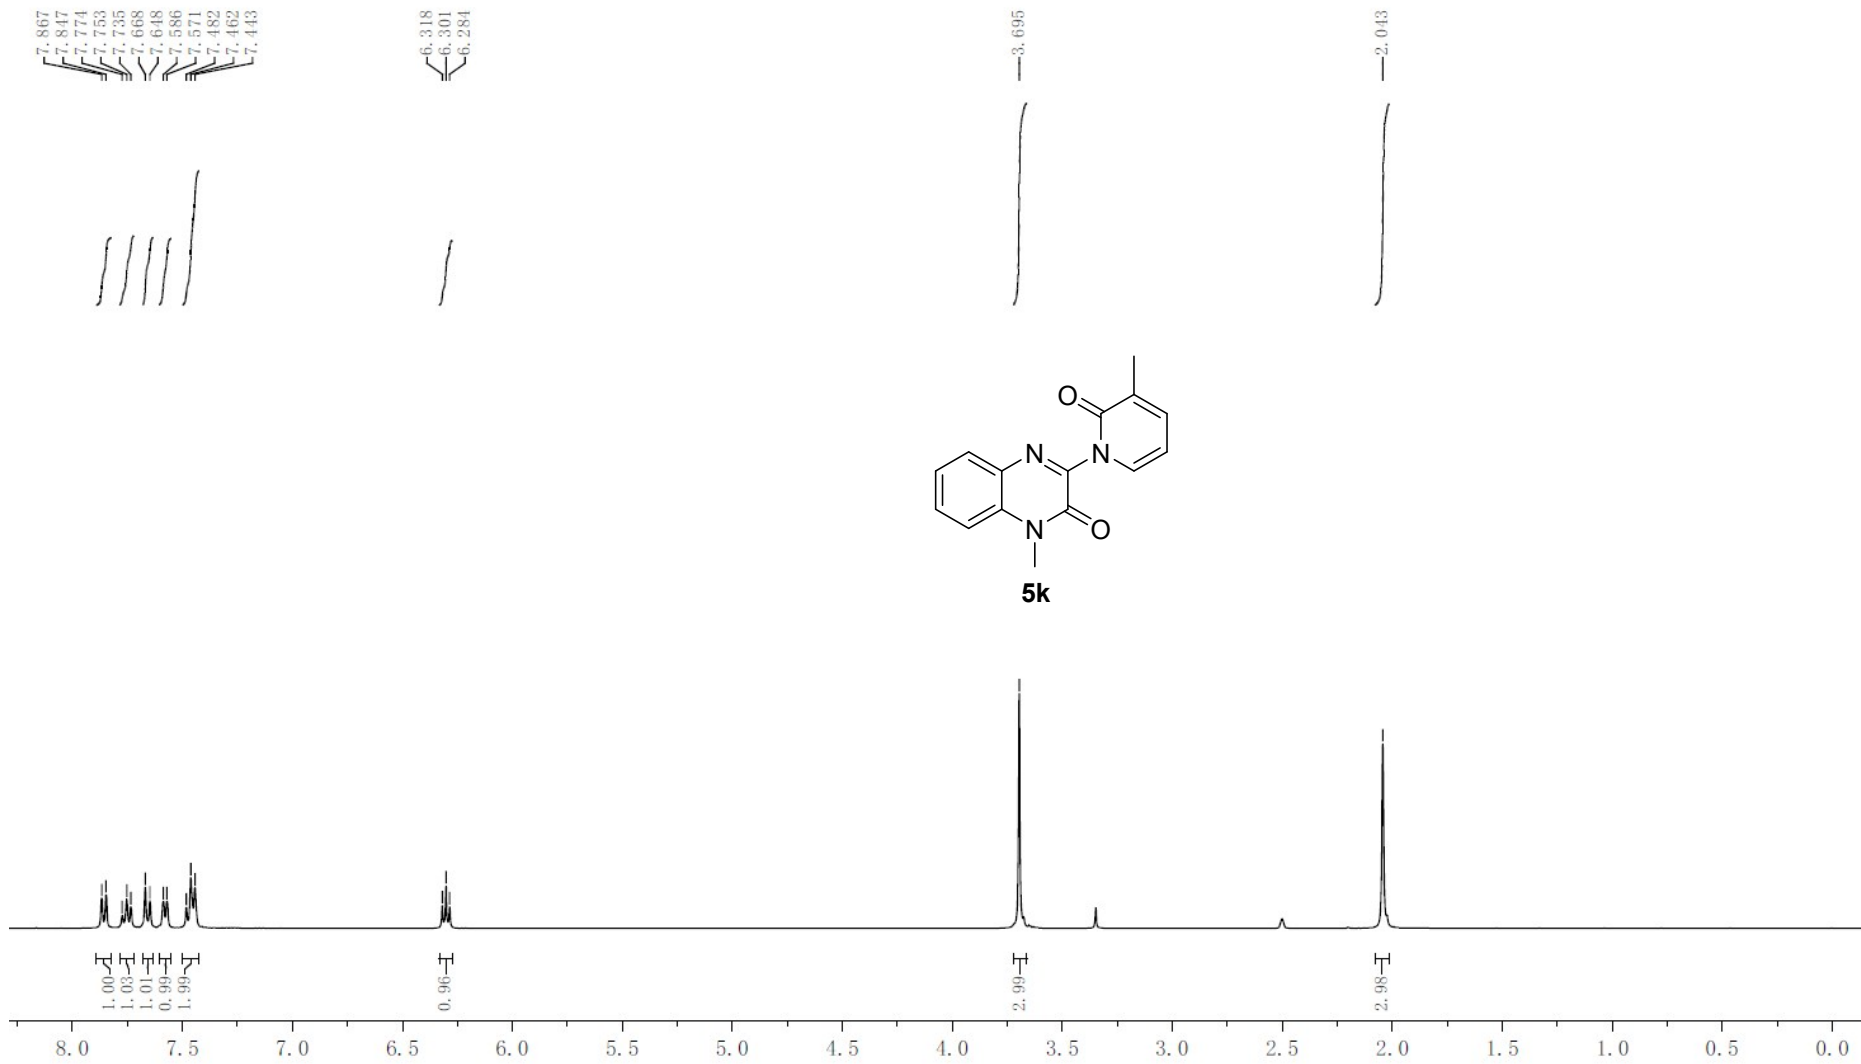

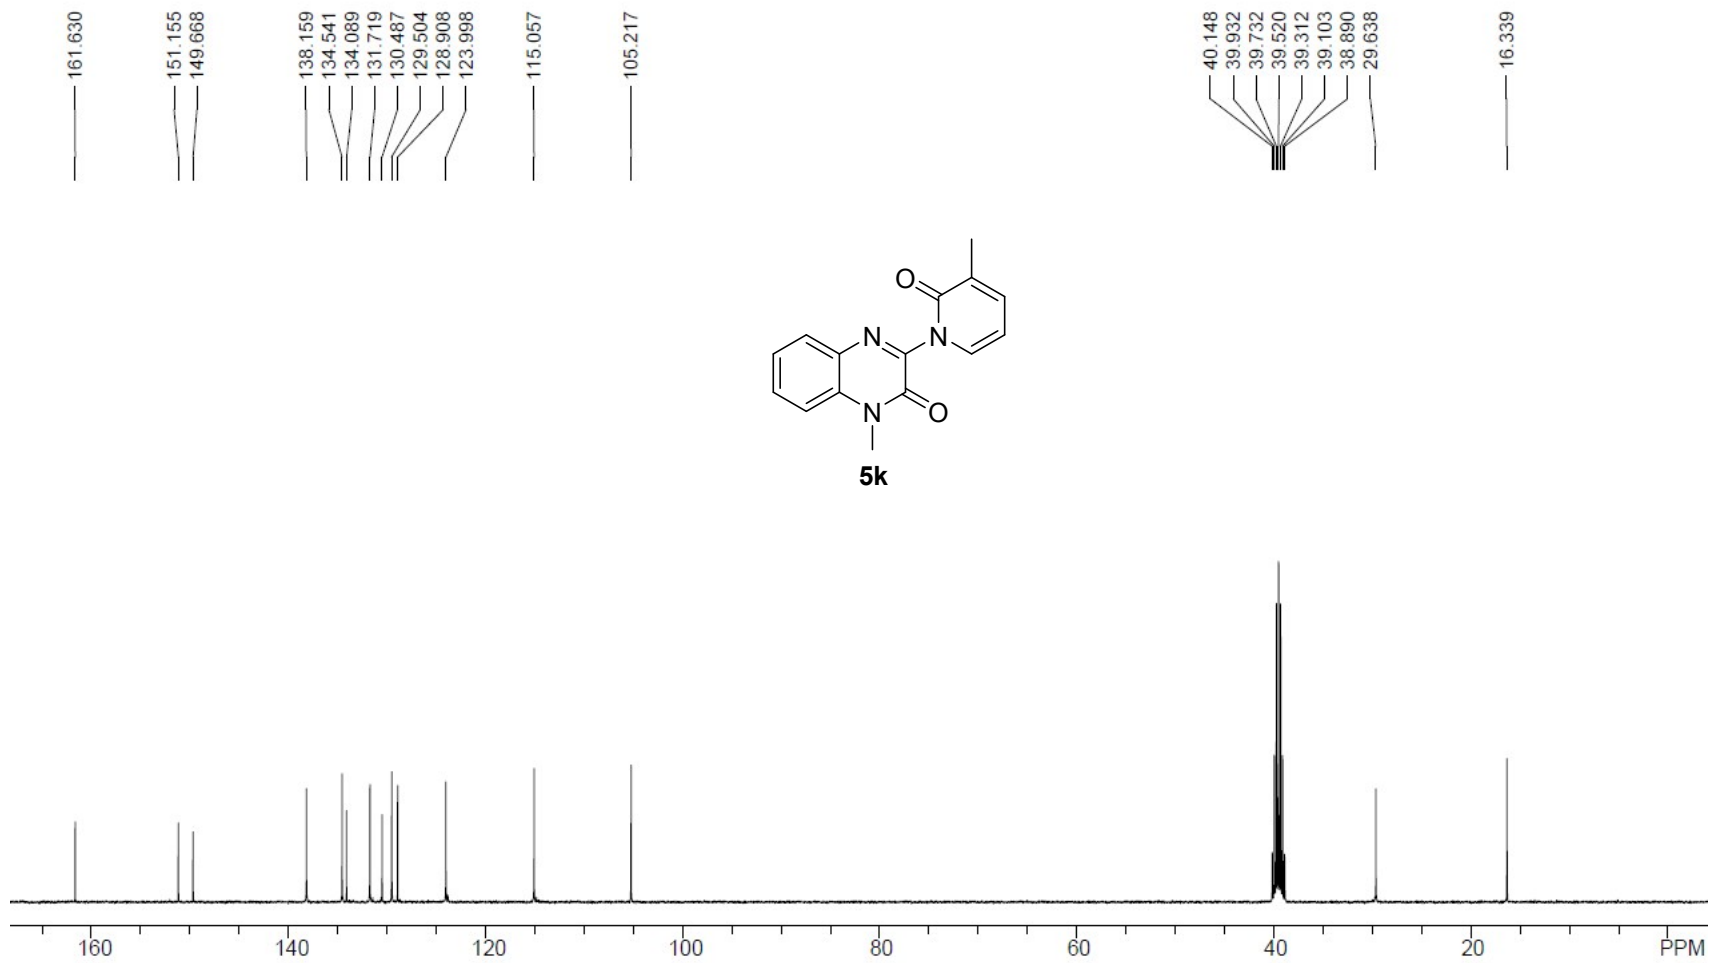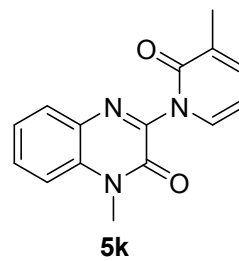

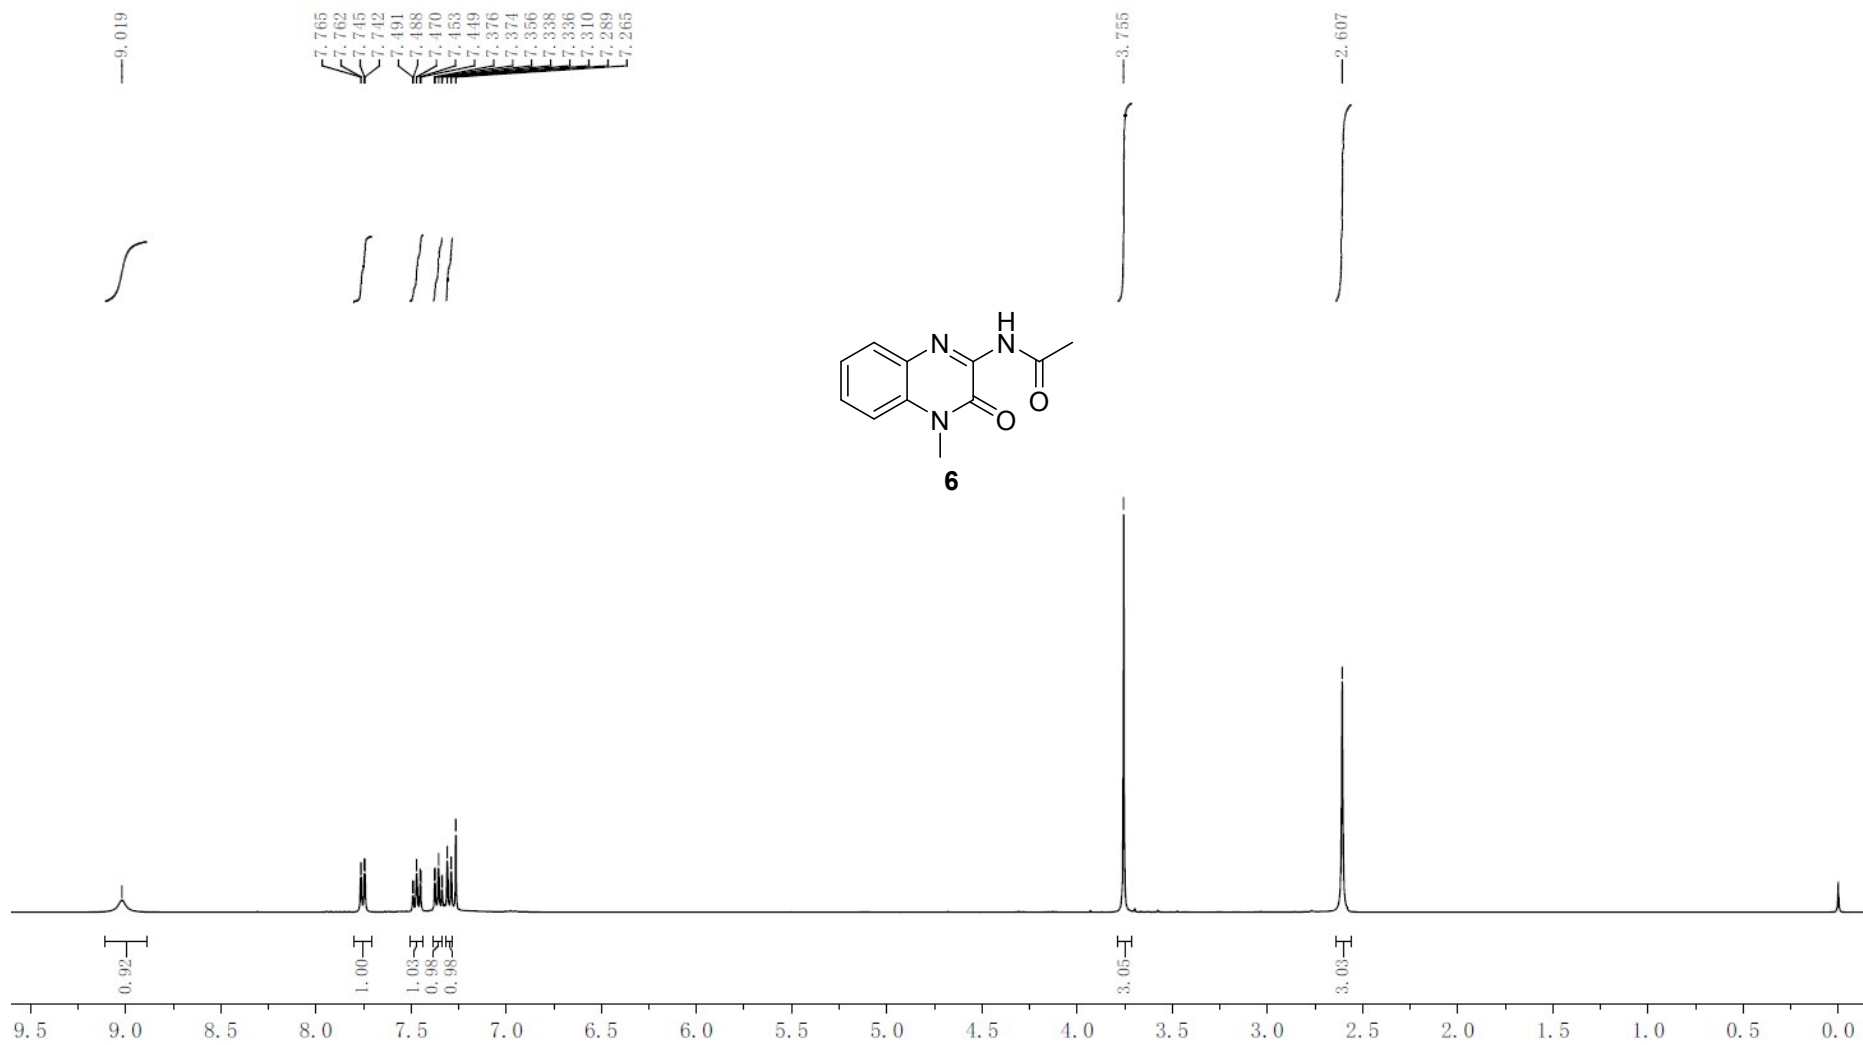



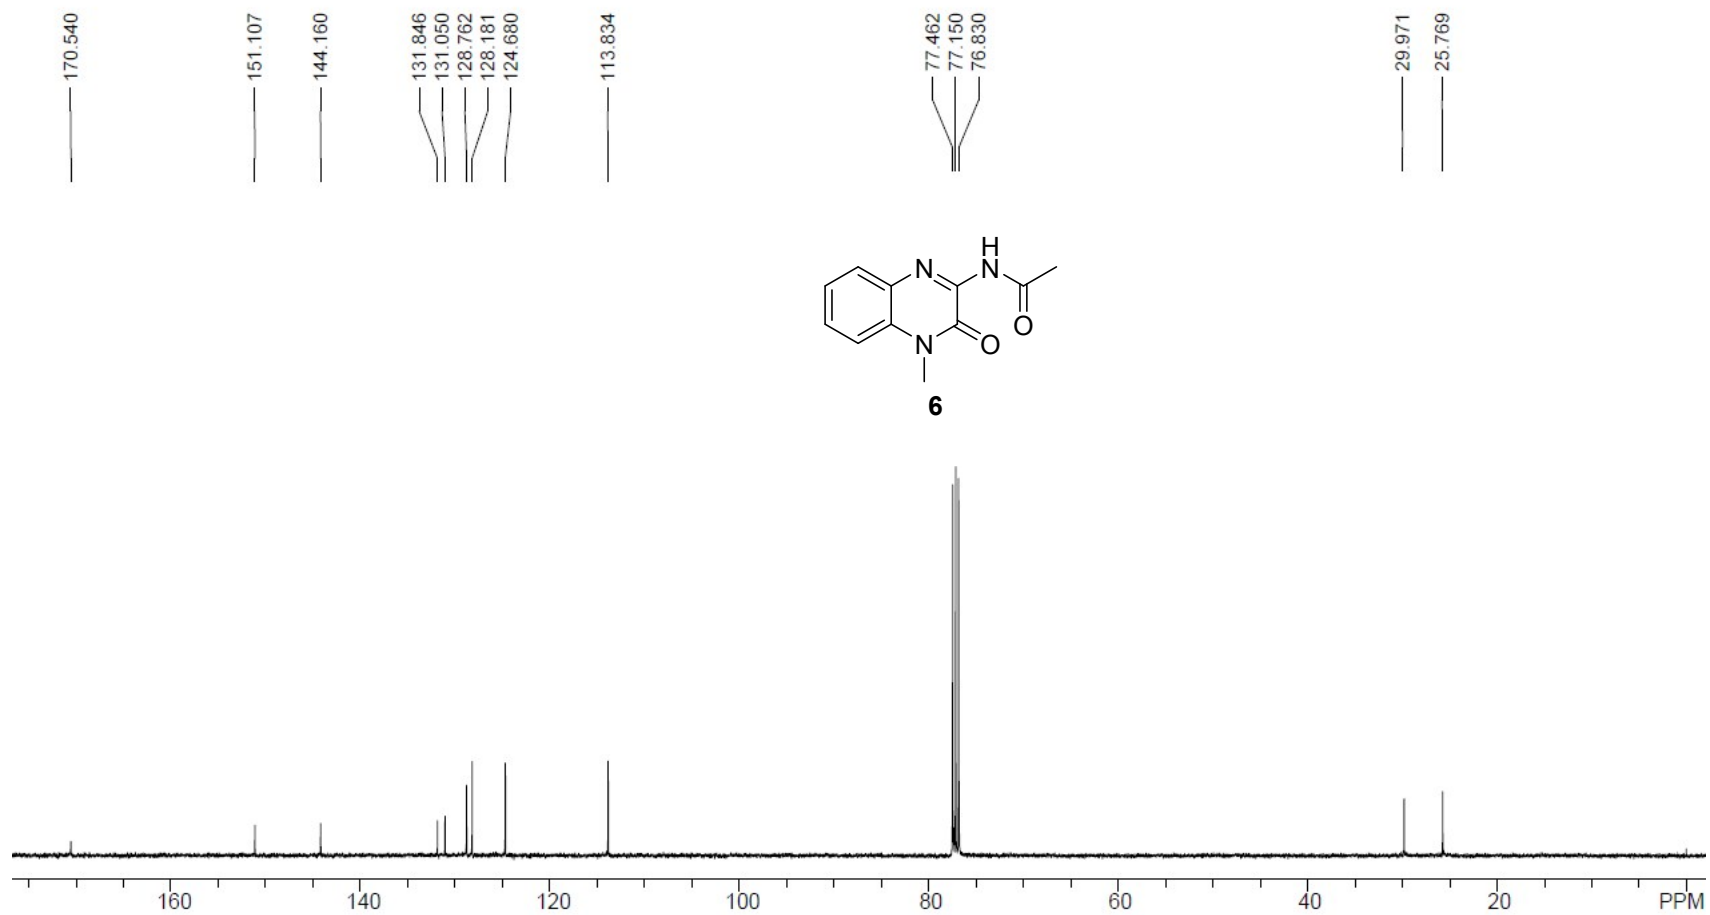

Supplement: c9ob00294d1.pdf [file c9ob00294d1.pdf]
